# Supplementary material for: Optimization of the Central α-Amino Acid in Cystobactamids to the Broad-Spectrum, Resistance-Breaking Antibiotic CN-CC-861
Source: PubMed Central journal article supplement (PMC11472329; doi:10.1021/acs.jmedchem.4c00927), 2024-09-20
Supplement: jm4c00927_si_001.pdf [file jm4c00927_si_001.pdf]

## Supplementary Information

### Optimization of the central $\alpha$ -amino acid in cystobactamids to the broad-spectrum, resistance-breaking antibiotic CN-CC-861

*Daniel Kohnhäuser<sup>1</sup>, Tim Seedorf<sup>2</sup>, Katarina Cimski<sup>3,4</sup>, Dominik Heimann<sup>1</sup>, Janetta Coetzee<sup>3,4</sup>, Sylvie Sordello<sup>5</sup>, Jana Richter<sup>1</sup>, Moritz Stappert<sup>1</sup>, Jean-Francois Sabuco<sup>5</sup>, David Corbett<sup>5</sup>, Eric Bacqué<sup>5</sup>, Katharina Rox<sup>1,4</sup>, Jennifer Herrmann<sup>3,4</sup>, Aurelie Vassort<sup>5</sup>, Rolf Müller<sup>3,4</sup>, Andreas Kirschning<sup>2,6</sup>, Mark Brönstrup<sup>1,2,4,\*</sup>*

#### Author Address

<sup>1</sup> Department of Chemical Biology, Helmholtz Centre for Infection Research, Inhoffenstraße 7, 38124 Braunschweig, Germany.

<sup>2</sup> Institute of Organic Chemistry and Biomolecular Drug Research Centre (BMWZ), Leibniz University Hannover, Schneiderberg 1B, 30167, Hannover, Germany.

<sup>3</sup> Microbial Natural Products, Helmholtz Institute for Pharmaceutical Research Saarland (HIPS), Helmholtz Centre for Infection Research (HZI), Department of Pharmacy at Saarland University, Campus Building E8.1, 66123 Saarbrücken (Germany).

<sup>4</sup> German Center for Infection Research (DZIF), Site Hannover-Braunschweig, Inhoffenstraße 7, 38124 Braunschweig, Germany.

<sup>5</sup> Evotec ID, 1541 Avenue Marcel Merieux, 69289 Marcy l'Etoile, France.

<sup>6</sup> Uppsala Biomedical Center (BMC), Uppsala University, Husargatan 3, 752 37 Uppsala, Sweden

#### Corresponding Author

Mark Brönstrup, email: [mark.broenstrup@helmholtz-hzi.de](mailto:mark.broenstrup@helmholtz-hzi.de)

#### Table of content

|                                               |    |
|-----------------------------------------------|----|
| SI Tables .....                               | 2  |
| Docking Study .....                           | 12 |
| Synthesis of Cystobactamide Derivatives ..... | 15 |
| NMR Spectra of Final Compounds.....           | 36 |
| HPLC chromatograms .....                      | 68 |
| References .....                              | 70 |

## SI Tables

Table S1. MIC values of selected compounds on an extended panel of bacteria compared to CN-DM-861 and ciprofloxacin (CIP) determined by standard procedures<sup>5</sup>.

|                                                                                   | MIC (µg/mL) |             |          |        |       |            |      |
|-----------------------------------------------------------------------------------|-------------|-------------|----------|--------|-------|------------|------|
|                                                                                   | CN-DM-861   | CIP         | 23       | 24     | 27    | 32         | 33   |
| <b>Gram-negative</b>                                                              |             |             |          |        |       |            |      |
| <i>A. baumannii</i> DSM 30008                                                     | 0.5         | 0.2-0.32    | 0.25     | 0.06   | 0.25  | 0.4        | 2    |
| <i>A. baumannii</i> ATCC BAA-1710                                                 | 64          | > 6.4       | 0.25-0.5 | 0.06   | 1     | 0.05       | 2    |
| <i>A. baumannii</i> CIP-105742                                                    | 0.06        | ≤ 0.03-0.25 | 0.06     | 0.016  | 0.5   | 0.05       | 0.25 |
| <i>A. baumannii</i> CIP-107292                                                    | 64          | 64          | 0.5-4    | 4      | 4     | 2          | > 64 |
| <i>A. baumannii</i> R835                                                          | 2-64        | 32          | 4        | 2      | > 8   | 6.4        | > 64 |
| <i>A. baumannii</i> NCTC 13301                                                    | > 64        | 32          | 0.8      | 0.5    | 4     | 0.06-0.125 | > 64 |
| <i>A. baumannii</i> ACC00445                                                      | >32         | n.d.        | 4        | 1      | n.d.  | n.d.       | n.d. |
| <i>E. aerogenes</i> CIP-106754                                                    | > 64        | > 6.4       | > 64     | 1      | > 6.4 | 2-4        | > 64 |
| <i>K. pneumoniae</i> CIP-104298                                                   | 4           | 0.025       | > 64     | > 64   | 32    | > 6.4      | 1    |
| <i>K. pneumoniae</i> KP10581 (waaC::Tn30)                                         | 0.125-2     | > 6.4       | > 64     | 0.5    | > 6.4 | 0.1-0.2    | > 64 |
| <i>K. pneumoniae</i> R-1525 (QnrA1)                                               | > 64        | > 64        | > 64     | > 64   | > 6.4 | > 64       | > 64 |
| <i>K. pneumoniae</i> DSM 30104                                                    | 0.25-64     | 0.01-0.1    | > 64     | n.d.   | 1     | n.d.       | n.d. |
| <i>P. aeruginosa</i> PAO1                                                         | n.d.        | n.d.        | n.d.     | 8      | n.d.  | > 64       | > 64 |
| <i>P. aeruginosa</i> CRPA/4MRGN (clin HAP/VAP, pneumo isolate BAL #2182MHH, 2021) | n.d.        | n.d.        | > 64     | > 64   | > 64  | > 64       | > 64 |
| <i>E. cloacae</i> ATCC BAA-2468                                                   | 1           | > 6.4       | 4        | 4      | 6.4   | 2          | 0.25 |
| <i>P. vulgaris</i> DSM 2140                                                       | 0.25-0.5    | ≤ 0.06      | 1        | n.d.   | 4     | n.d.       | n.d. |
| <i>S. marcescens</i> DSM 30121                                                    | 64          | 0.2         | > 64     | n.d.   | 2     | n.d.       | n.d. |
| <b>Gram-positive</b>                                                              |             |             |          |        |       |            |      |
| <i>E. faecium</i> DSM 17050                                                       | n.d.        | 0.05-4      | ≤ 0.03   | 32     | > 6.4 | 0.01       | > 64 |
| <i>S. aureus</i> NRS384                                                           | n.d.        | 2           | 0.5      | 0.06   | n.d.  | n.d.       | n.d. |
| <i>S. aureus</i> MRSA (clin HAP/VAP, pneumo isolate BAL #2524MHH, 2022)           | n.d.        | n.d.        | n.d.     | ≤ 0.03 | n.d.  | ≤ 0.03     | > 64 |

n.d.: not determined.

Table S2. MIC values of selected compounds on an extended panel of bacteria compared to CN-DM-861 and ciprofloxacin (CIP) determined by standard procedures<sup>5</sup>.

|                                           | MIC (µg/mL) |             |          |            |            |
|-------------------------------------------|-------------|-------------|----------|------------|------------|
|                                           | CN-DM-861   | CIP         | 37       | 38         | 39         |
| <b>Gram-negative</b>                      |             |             |          |            |            |
| <i>A. baumannii</i> DSM 30008             | 0.5         | 0.2-0.32    | 0.03     | 0.016-0.03 | 0.125-0.25 |
| <i>A. baumannii</i> ATCC BAA-1710         | 64          | > 6.4       | 0.25-0.5 | 0.06-0.125 | 0.5-1      |
| <i>A. baumannii</i> CIP-105742            | 0.06        | ≤ 0.03-0.25 | ≤ 0.0038 | 0.016      | 0.06       |
| <i>A. baumannii</i> CIP-107292            | 64          | 64          | 0.5      | > 8        | 2-4        |
| <i>A. baumannii</i> R835                  | 2-64        | 32          | 0.5      | 4          | 2-4        |
| <i>A. baumannii</i> ACC00535              | > 32        | n.d.        | n.d.     | n.d.       | 0.5        |
| <i>A. baumannii</i> NCTC 13301            | > 64        | 32          | 1.25     | 0.06       | 0.5        |
| <i>E. aerogenes</i> CIP-106754            | > 64        | > 6.4       | 2        | 1          | > 64       |
| <i>E. cloacae</i> ATCC BAA-2468           | 1           | > 6.4       | 2        | 0.25       | > 64       |
| <i>K. pneumoniae</i> CIP-104298           | 4           | 0.025       | ≤ 0.3    | 1          | > 64       |
| <i>K. pneumoniae</i> KP10581 (waaC::Tn30) | 0.125-2     | > 6.4       | 0.25     | ≤ 0.03     | > 64       |
| <i>K. pneumoniae</i> R-1525 (QnrA1)       | > 64        | > 64        | 1.25     | 4          | > 64       |
| <b>Gram-positive</b>                      |             |             |          |            |            |
| <i>E. faecium</i> DSM 17050               | n.d.        | 0.05-4      | ≤ 0.06   | 0.125      | > 64       |
| <i>S. pneumoniae</i> DSM 11865            | n.d.        | > 6.4       | ≤ 0.3    | 0.5        | > 64       |

n.d.: not determined.

Table S3. MIC values of selected compounds on an extended panel of bacteria compared to CN-DM-861 and ciprofloxacin (CIP) determined by standard procedures<sup>5</sup>.

|                                                                                   | MIC (µg/mL) |             |       |              |          |            |
|-----------------------------------------------------------------------------------|-------------|-------------|-------|--------------|----------|------------|
|                                                                                   | CN-DM-861   | CIP         | 40    | 41           | 42       | 43         |
| <b>Gram-negative</b>                                                              |             |             |       |              |          |            |
| <i>A. baumannii</i> DSM 30008                                                     | 0.5         | 0.2-0.32    | n.d.  | 0.06-0.125   | ≤ 0.0038 | n.d.       |
| <i>A. baumannii</i> ATCC BAA-1710                                                 | 64          | > 6.4       | 0.25  | 1            | 0.25     | 0.05       |
| <i>A. baumannii</i> CIP-105742                                                    | 0.06        | ≤ 0.03-0.25 | > 64  | 0.0075-0.015 | ≤ 0.0038 | n.d.       |
| <i>A. baumannii</i> CIP-107292                                                    | 64          | 64          | 8     | 8            | 1        | 2-4        |
| <i>A. baumannii</i> R835                                                          | 2-64        | 32          | 1     | 8            | 2-4      | n.d.       |
| <i>A. baumannii</i> ACC00535                                                      | > 32        | n.d.        | n.d.  | 0.25         | 0.5      | n.d.       |
| <i>A. baumannii</i> NCTC 13301                                                    | > 64        | 32          | 4     | 0.25         | 0.5      | 0.125-0.25 |
| <i>E. aerogenes</i> CIP-106754                                                    | n.d.        | > 6.4       | 0.125 | 1            | 8        | 1          |
| <i>E. cloacae</i> ATCC BAA-2468                                                   | 1           | > 6.4       | 0.01  | ≤ 0.03       | 0.25     | n.d.       |
| <i>K. pneumoniae</i> CIP-104298                                                   | 4           | 0.025       | 0.25  | 0.5          | 0.5      | n.d.       |
| <i>K. pneumoniae</i> KP10581 (waaC::Tn30)                                         | 0.125-2     | > 6.4       | 0.5   | ≤ 0.03       | ≤ 0.03   | 0.025      |
| <i>K. pneumoniae</i> R-1525 (QnrA1)                                               | > 64        | > 64        | 0.5   | 2            | 1        | 32-64      |
| <i>P. aeruginosa</i> PAO1                                                         | n.d.        | n.d.        | > 64  | n.d.         | n.d.     | 4          |
| <i>P. aeruginosa</i> CRPA/4MRGN (clin HAP/VAP, pneumo isolate BAL #2182MHH, 2021) | n.d.        | n.d.        | > 64  | > 6.4        | 3.2      | 32         |
| <b>Gram-positive</b>                                                              |             |             |       |              |          |            |
| <i>E. faecium</i> DSM 17050                                                       | n.d.        | 0.05-4      | 0.04  | ≤ 0.03       | ≤ 0.03   | 0.0025     |
| <i>S. aureus</i> MRSA (clin HAP/VAP, pneumo isolate BAL #2524MHH, 2022)           | n.d.        | n.d.        | 0.05  | n.d.         | n.d.     | ≤ 0.03     |
| <i>S. pneumoniae</i> DSM 11865 (PRSP)                                             | n.d.        | > 6.4       | 0.004 | 1            | > 64     | n.d.       |

n.d.: not determined.

Table S4. MIC values of selected compounds on an extended panel of bacteria compared to CN-DM-861 and ciprofloxacin (CIP) by standard procedures<sup>5</sup>.

|                                                                                   | CN-DM-861 | CIP         | CN-CC-861 (13) | 21     | 26     | 22     | 25     |
|-----------------------------------------------------------------------------------|-----------|-------------|----------------|--------|--------|--------|--------|
| <u>Gram-negative</u>                                                              |           |             |                |        |        |        |        |
| <i>A. baumannii</i> ATCC BAA-1710                                                 | 64        | > 6.4       | 0.06 – 0.25    | ≤ 0.03 | 1      | 0.125  | > 64   |
| <i>A. baumannii</i> CIP-105742                                                    | 0.06      | ≤ 0.03-0.25 | 0.02           | ≤ 0.03 | ≤ 0.03 | ≤ 0.03 | > 64   |
| <i>A. baumannii</i> CIP-107292                                                    | 64        | 64          | 0.5 – 1        | 2      | 2      | 2      | > 64   |
| <i>A. baumannii</i> R835                                                          | 2-64      | 32          | 1              | 0.5    | 2      | 1      | > 64   |
| <i>A. baumannii</i> NCTC 13301                                                    | > 64      | 32          | 2              | 0.25   | n.d.   | 0.5    | > 64   |
| <i>E. aerogenes</i> CIP-106754                                                    | n.d.      | > 6.4       | 0.125 – 4      | 4      | > 64   | 2      | 2      |
| <i>E. cloacae</i> ATCC BAA-2468                                                   | 1         | > 6.4       | 0.06 – 0.5     | 0.5    | 0.5    | 0.5    | 2      |
| <i>K. pneumoniae</i> CIP-104298                                                   | 4         | 0.025       | 8              | > 64   | 0.25   | > 64   | > 64   |
| <i>K. pneumoniae</i> KP10581 (waaC::Tn30)                                         | 0.125-2   | > 6.4       | 0.06 – 0.25    | > 64   | 0.25   | > 64   | > 64   |
| <i>K. pneumoniae</i> R-1525 (QnrA1)                                               | > 64      | > 64        | 16 - > 64      | > 64   | 0.25   | > 64   | 0.5    |
| <i>P. aeruginosa</i> CRPA/4MRGN (clin HAP/VAP, pneumo isolate BAL #2182MHH, 2021) | n.d.      | n.d.        | > 64           | 32     | > 64   | > 64   | ≤ 0.03 |
| <u>Gram-positive</u>                                                              |           |             |                |        |        |        |        |
| <i>E. faecium</i> DSM 17050                                                       | n.d.      | 0.05-4      | ≤ 0.03         | ≤ 0.03 | ≤ 0.03 | ≤ 0.03 | ≤ 0.03 |

n.d.: not determined.

Table S5. Antibiotic activities of CN-DM-861, CN-CC-861 and ciprofloxacin (CIP) against susceptible and multiresistant bacteria.

| Genus                 | Species           | Strain | MIC (µg/mL) |           |       | Resistance phenotype | Resistant against:                                                                              | Susceptible against:                                                                                                                                               |
|-----------------------|-------------------|--------|-------------|-----------|-------|----------------------|-------------------------------------------------------------------------------------------------|--------------------------------------------------------------------------------------------------------------------------------------------------------------------|
|                       |                   |        | CN-DM-861   | CN-CC-861 | CIP   |                      |                                                                                                 |                                                                                                                                                                    |
| <i>Enterococcus</i>   | <i>E. faecium</i> | EF66   | 32          | ≤ 0.03    | > 6.4 | VRE                  | Ampicillin, Cefuroxim, Imipenem, Vancomycin                                                     | Gentamicin (high-level), Linezolid, Tigecyclin                                                                                                                     |
| <i>Staphylococcus</i> | <i>S. aureus</i>  | Sa6    | 1           | ≤ 0.03    | 0.2   | MSSA                 | Penicillin G                                                                                    | Cefazolin, Clindamycin, Co-trimoxazol, Daptomycin, Doxycyclin, Erythromycin, Fosfomycin, Fusidinsäure, Linezolid, Gentamicin, Moxifloxacin, Tigecyclin, Vancomycin |
|                       | <i>S. aureus</i>  | Sa20   | 1           | ≤ 0.03    | 0.4   | MSSA                 | Penicillin G                                                                                    | Clindamycin, Co-trimoxazol, Daptomycin, Erythromycin, Flucloxacillin, Fosfomycin, Fusidinsäure, Linezolid, Gentamicin, Tigecyclin, Vancomycin                      |
|                       | <i>S. aureus</i>  | Sa26   | 0.25        | ≤ 0.03    | 0.2   | MSSA                 | Penicillin G                                                                                    | Clindamycin, Co-trimoxazol, Daptomycin, Erythromycin, Fosfomycin, Fusidinsäure, Linezolid, Gentamicin, Oxacillin, Tetracyclin, Tigecyclin, Vancomycin              |
|                       | <i>S. aureus</i>  | Sa37   | 8           | 0.125     | > 6.4 | MRSA                 | Cefazolin, Ciprofloxacin, Clindamycin, Erythromycin, Flucloxacillin, Moxifloxacin, Penicillin G | Co-trimoxazol, Daptomycin, Doxycyclin, Fosfomycin, Fusidinsäure, Gentamicin, Linezolid, Tigecyclin, Vancomycin                                                     |
|                       | <i>S. aureus</i>  | Sa40   | 32          | 0.125     | > 6.4 | MRSA                 | Cefuroxim, Ciprofloxacin, Clindamycin, Erythromycin, Moxifloxacin, Oxacillin, Penicillin G      | Co-trimoxazol, Daptomycin, Fosfomycin, Fusidinsäure, Gentamicin, Linezolid, Tetracyclin, Tigecyclin, Vancomycin                                                    |
|                       | <i>S. aureus</i>  | Sa38   | 4           | 0.125     | > 6.4 | MSSA                 | Ciprofloxacin, Moxifloxacin, Penicillin G                                                       | Cefazolin, Clindamycin, Co-trimoxazol, Daptomycin, Doxycyclin, Erythromycin, Flucloxacillin, Fosfomycin, Fusidinsäure, Linezolid,                                  |

|                   |                   |      |      |        |          |       |                                                                                                         |                                                                                                                                                                                |
|-------------------|-------------------|------|------|--------|----------|-------|---------------------------------------------------------------------------------------------------------|--------------------------------------------------------------------------------------------------------------------------------------------------------------------------------|
|                   |                   |      |      |        |          |       |                                                                                                         | Gentamicin, Tigecyclin, Vancomycin                                                                                                                                             |
|                   | <i>S. aureus</i>  | Sa45 | > 64 | 0.5    | > 6.4    | MRSA  | Cefuroxim, Ciprofloxacin, Clindamycin, Erythromycin, Moxifloxacin, Oxacillin, Penicillin G              | Linezolid, Tigecyclin, Vancomycin                                                                                                                                              |
|                   | <i>S. aureus</i>  | Sa46 | 32   | 0.5    | 6.4      | MRSA  | Cefuroxim, Ciprofloxacin, Co-Trimoxazol, Clindamycin, Gentamicin, Moxifloxacin, Oxacillin, Penicillin G | Clindamycin, Daptomycin, Erythromycin, Fosfomycin, Fusidinsäure, Linezolid, Tetracyclin, Tigecyclin, Vancomycin                                                                |
|                   | <i>S. aureus</i>  | Sa68 | 1    | ≤ 0.03 | 0.4      | MSSA  | -                                                                                                       | Cefuroxim, Clindamycin, Co-trimoxazol, Daptomycin, Erythromycin, Fosfomycin, Fusidinsäure, Linezolid, Gentamicin, Moxifloxacin, Oxacillin, Tetracyclin, Tigecyclin, Vancomycin |
|                   | <i>S. aureus</i>  | Sa69 | > 64 | 0.25   | > 6.4    | MRSA  | Cefuroxim, Ciprofloxacin, Clindamycin, Erythromycin, Moxifloxacin, Oxacillin, Penicillin G              | Co-trimoxazol, Daptomycin, Fosfomycin, Fusidinsäure, Linezolid, Gentamicin, Tetracyclin, Tigecyclin, Vancomycin                                                                |
| Median MIC        |                   |      | 4-8  | 0.125  | 6.4->6.4 |       |                                                                                                         |                                                                                                                                                                                |
| <i>Klebsiella</i> | <i>K. oxytoca</i> | K6   | 0.25 | ≤ 0.03 | 0.006    |       | Ampicillin, Ampicillin/Sulbactam <sup>1</sup> , Cefuroxim <sup>1</sup>                                  | Cefotaxim, Cefpodoxim, Ceftazidim, Ciprofloxacin, Co-trimoxazol, Ertapenem, Gentamicin, Imipenem, Meropenem, Moxifloxacin, Piperacillin, Piperacillin/Tazobactam, Tigecyclin   |
|                   | <i>K. oxytoca</i> | K24  | 2    | 0.25   | 0.0125   |       | Ampicillin, Ampicillin/Sulbactam, Cefuroxim <sup>1</sup> ,                                              | Cefotaxim, Cefpodoxim, Ceftazidim, Ciprofloxacin, Co-trimoxazol, Ertapenem, Gentamicin, Imipenem, Meropenem, Moxifloxacin, Piperacillin, Piperacillin/Tazobactam, Tigecyclin   |
|                   | <i>K. oxytoca</i> | K26  | 0.5  | 0.125  | 3.2      | 3MRGN | Ampicillin, Ampicillin/Sulbactam, Cefotaxim, Cefpodoxim,                                                | Ertapenem, Gentamicin, Imipenem, Meropenem                                                                                                                                     |

|                      |     |      |       |        |       |                                                                                                                                                                                                                                             |                                                                                                                                                                                                                                               |  |
|----------------------|-----|------|-------|--------|-------|---------------------------------------------------------------------------------------------------------------------------------------------------------------------------------------------------------------------------------------------|-----------------------------------------------------------------------------------------------------------------------------------------------------------------------------------------------------------------------------------------------|--|
|                      |     |      |       |        |       |                                                                                                                                                                                                                                             | Ceftazidim, Cefuroxim, Ciprofloxacin, Co-trimoxazol, Moxifloxacin, Piperacillin, Piperacillin/Tazobactam                                                                                                                                      |  |
| <i>K. oxytoca</i>    | K27 | 0.25 | 0.125 | 0.6    | 3MRGN | Ampicillin, Ampicillin/Sulbactam, Cefalexin, Cefpodoxim, Ceftazidim, Cefuroxim, Ciprofloxacin, Co-Trimoxacol, Levofloxacin, Piperacillin, Trimethoprim                                                                                      | Fosfomycin, Gentamicin, Imipenem, Meropenem                                                                                                                                                                                                   |  |
| <i>K. oxytoca</i>    | K33 | 0.5  | 0.25  | 0.0125 | 4MRGN | Ampicillin, Ampicillin/Sulbactam, Cefotaxim, Cefpodoxim, Ceftazidim, Cefuroxim, Ertapenem, Fosfomycin, Imipenem <sup>1</sup> , Meropenem <sup>1</sup> , Piperacillin, Piperacillin/Tazobactam                                               | Amikacin, Aztreonam, Ceftazidim/Avibactam, Ciprofloxacin, Co-trimoxazol, Gentamicin, Moxifloxacin, Tobramycin, Tigecyclin                                                                                                                     |  |
| <i>K. pneumoniae</i> | K46 | 2    | 8     | 0.05   |       | Ampicillin, Piperacillin                                                                                                                                                                                                                    | Amikacin, Ampicillin/Sulbactam, Aztreonam, Cefepim, Cefotaxim, Ceftazidim, Ciprofloxacin, Co-trimoxazol, Fosfomycin, Gentamicin, Meropenem, Moxifloxacin, Piperacillin/Tazobactam, Polymyxin B/Colistin, Tigecyclin, Tobramycin, Trimethoprim |  |
| <i>K. pneumoniae</i> | K47 | 1    | 32    | > 6.4  | 4MRGN | Ampicillin, Ampicillin/Sulbactam, Cefalexin, Cefpodoxim, Ceftazidim, Cefuroxim, Ciprofloxacin, Co-Trimoxacol, Ertapenem, Fosfomycin, Gentamicin, Imipenem <sup>1</sup> , Levofloxacin, Moxifloxacin, Piperacillin, Trimethoprim, Tobramycin | Amikacin, Polymyxin B/Colistin, Tigecyclin                                                                                                                                                                                                    |  |
| <i>K. pneumoniae</i> | K61 | 4    | > 64  | > 6.4  | 3MRGN | Ampicillin, Ampicillin/Sulbactam, Cefalexin, Cefpodoxim, Ceftazidim, Cefuroxim, Ciprofloxacin, Co-Trimoxacol, Gentamicin, Levofloxacin, Piperacillin, Trimethoprim                                                                          | Fosfomycin, Imipenem, Meropenem                                                                                                                                                                                                               |  |
| <i>K. pneumoniae</i> | K62 | 8    | 8     | > 6.4  | 4MRGN | Ampicillin, Amoxicillin/Clavulansäure,                                                                                                                                                                                                      | Amikacin, Aztreonam, Fosfomycin, Tigecyclin                                                                                                                                                                                                   |  |



|                    |                      |      |       |        |         |       |                                                                                                                                                                                                                                                                                               |                                                                               |
|--------------------|----------------------|------|-------|--------|---------|-------|-----------------------------------------------------------------------------------------------------------------------------------------------------------------------------------------------------------------------------------------------------------------------------------------------|-------------------------------------------------------------------------------|
|                    |                      |      |       |        |         |       | Cefalexin, Cefotaxim, Cefpodoxim, Ceftazidim/Avibactam, Ceftazidim, Cefuroxim, Cefuroxim/Cefuroxim-Axetil, Cefepim, Ciprofloxacin, Co-Trimoxacol, Ertapenem, Imipenem <sup>1</sup> , Levofloxacin, Meropenem <sup>1</sup> , Moxifloxacin, Piperacillin, Piperazillin/Tazobactam, Trimethoprim |                                                                               |
|                    | <i>K. pneumoniae</i> | K63  | 0.5   | 8      | 3.2     | 2MRGN | Ampicillin, Amoxicillin/Clavulansäure, Cefotaxim, Ceftazidim, Cefuroxim, Cefuroxim/Cefuroxim-Axetil, Cefepim, Ciprofloxacin, Co-Trimoxacol, Levofloxacin, Trimethoprim                                                                                                                        | Ertapenem, Fosfomycin, Meropenem, Piperacillin/Tazobactam                     |
| Median MIC         |                      |      | 0.5-1 | 0.25-8 | 0.6-3.2 |       |                                                                                                                                                                                                                                                                                               |                                                                               |
| <i>Pseudomonas</i> | <i>P. aeruginosa</i> | Pa33 | > 64  | > 64   | 0.4     | 4MRGN | Aztreonam, Cefepim, Ceftazidim, Ciprofloxacin, Imipenem, Meropenem, Piperacillin, Piperacillin/Tazobactam                                                                                                                                                                                     | Amikacin, Gentamicin, Polymyxin B/Colistin, Tobramycin                        |
|                    | <i>P. aeruginosa</i> | Pa34 | 16    | 1      | 3.2     | 4MRGN | Aztreonam, Cefepim, Ceftazidim, Ciprofloxacin, Gentamicin, Imipenem, Levofloxacin, Meropenem, Piperacillin                                                                                                                                                                                    | Ceftazidim/Avibactam, Ceftolozan/Tazobactam, Polymyxin B/Colistin, Tobramycin |
|                    | <i>P. aeruginosa</i> | Pa57 | > 64  | 8      | > 6.4   | 4MRGN | Amikazin, Aztreonam, Cefepim, Ceftazidim, Ceftazidim/Avibactam, Ceftolozan/Tazobactam, Ciprofloxacin, Fosfomycin, Gentamicin, Imipenem, Meropenem, Piperacillin, Piperacillin/Tazobactam, Tobramycin                                                                                          | Colistin                                                                      |
|                    | <i>P. aeruginosa</i> | Pa59 | 8     | 2      | 0.2     | 3MRGN | Aztreonam, Cefepim, Ceftazidim, Imipenem, Meropenem, Piperacillin, Piperacillin/Tazobactam                                                                                                                                                                                                    | Amikacin, Ciprofloxacin, Gentamicin, Tobramycin                               |
|                    | <i>P. aeruginosa</i> | Pa60 | > 64  | 8      | 0.4     | 3MRGN | Aztreonam, Cefepim, Ceftazidim, Imipenem, Meropenem,                                                                                                                                                                                                                                          | Amikacin, Ciprofloxacin, Gentamicin, Tobramycin                               |

|                      |                             |       |        |        |       |       |                                                                                                                                                   |                                                                                               |
|----------------------|-----------------------------|-------|--------|--------|-------|-------|---------------------------------------------------------------------------------------------------------------------------------------------------|-----------------------------------------------------------------------------------------------|
|                      |                             |       |        |        |       |       | Piperacillin,<br>Piperacillin/Tazobactam                                                                                                          |                                                                                               |
|                      | <i>P. aeruginosa</i>        | Pa61  | > 64   | > 64   | 0.4   | 3MRGN | Aztreonam, Cefepim, Ceftazidim,<br>Imipenem, Meropenem,<br>Piperacillin,<br>Piperacillin/Tazobactam                                               | Amikacin, Ciprofloxacin,<br>Gentamicin, Tobramycin                                            |
|                      | <i>P. aeruginosa</i>        | Pa62  | > 64   | 8      | 3.2   | 3MRGN | Aztreonam, Cefepim, Ceftazidim,<br>Ciprofloxacin, Piperacillin                                                                                    | Amikacin, Gentamicin,<br>Imipenem, Meropenem,<br>Tobramycin                                   |
|                      | <i>P. aeruginosa</i>        | Pa63  | > 64   | 8      | > 6.4 | 4MRGN | Aztreonam <sup>1</sup> , Cefepim,<br>Ceftazidim, Ciprofloxacin,<br>Imipenem, Meropenem <sup>1</sup> ,<br>Piperacillin,<br>Piperacillin/Tazobactam | Amikacin, Gentamicin,<br>PolymyxinB/Colistin, Tobramycin                                      |
|                      | <i>P. aeruginosa</i>        | Pa91  | > 64   | 8      | 0.8   | 4MRGN | Aztreonam, Cefepim, Ceftazidim,<br>Ciprofloxacin, Imipenem,<br>Levofloxacin, Meropenem,<br>Piperacillin                                           | Gentamicin, Polymyxin<br>B/Colistin, Tobramycin                                               |
|                      | <i>P. aeruginosa</i>        | Pa92  | 32     | 8      | 3.2   | 3MRGN | Cefepim, Ceftazidim,<br>Ciprofloxacin, Levofloxacin,<br>Piperacillin                                                                              | Gentamicin, Imipenem,<br>Meropenem, Tobramycin                                                |
|                      | <i>P. aeruginosa</i>        | Pa94  | 2      | 0.5    | > 6.4 | 4MRGN | Amikacin, Cefepim, Ceftazidim,<br>Ciprofloxacin, Gentamicin,<br>Imipenem, Levofloxacin,<br>Meropenem,<br>Piperacillin/Tazobactam,<br>Tobramycin   | -                                                                                             |
| Median MIC           |                             |       | > 64   | 8      | 3.2   |       |                                                                                                                                                   |                                                                                               |
| <i>Acinetobacter</i> | <i>A. baumannii</i>         | ABC3  | 4      | ≤ 0.03 | 0.1   |       | -                                                                                                                                                 | Ciprofloxacin, Co-trimoxazol,<br>Gentamicin, Imipenem,<br>Meropenem                           |
|                      | <i>A. baumannii complex</i> | ABC7  | 4      | 0.125  | > 6.4 | 3MRGN | Ciprofloxacin, Gentamicin,<br>Meropenem                                                                                                           | Amikacin, Co-Trimoxazol,<br>Imipenem, PolymyxinB/Colistin,<br>Tobramycin                      |
|                      | <i>A. johnsonii</i>         | ABC12 | ≤ 0.03 | ≤ 0.03 | 0.05  |       | -                                                                                                                                                 | Amikacin, Ciprofloxacin, Co-<br>Trimoxazol, Gentamicin,<br>Imipenem, Meropenem,<br>Tobramycin |
|                      | <i>A. Iwoffii</i>           | ABC14 | 0.06   | ≤ 0.03 | 0.025 |       | -                                                                                                                                                 | Ciprofloxacin, Gentamicin,<br>Imipenem, Meropenem,<br>Tobramycin                              |

|            |                             |       |      |            |         |       |                                                        |                                                            |
|------------|-----------------------------|-------|------|------------|---------|-------|--------------------------------------------------------|------------------------------------------------------------|
|            | <i>A. ursingii</i>          | ABC22 | > 64 | 4          | 0.1     |       | -                                                      | Ciprofloxacin, Gentamicin, Imipenem, Meropenem, Tobramycin |
|            | <i>A. baumannii</i> complex | ABC26 | 4    | 0.125      | 0.4     | 3MRGN | Ciprofloxacin <sup>1</sup>                             | Gentamicin, Imipenem, Meropenem                            |
|            | <i>A. baumannii</i> complex | ABC28 | 1    | 0.06       | 0.2     | 3MRGN | Ciprofloxacin <sup>1</sup> , Levofloxacin <sup>1</sup> | Co-Trimoxazol, Gentamicin, Imipenem, Meropenem             |
|            | <i>A. baumannii</i> complex | ABC29 | 16   | 0.5        | 0.4     | 3MRGN | Ciprofloxacin <sup>1</sup> , Levofloxacin <sup>1</sup> | Co-trimoxazol, Gentamicin, Imipenem, Meropenem             |
| Median MIC |                             |       | 4    | 0.06-0.125 | 0.1-0.2 |       |                                                        |                                                            |

<sup>1</sup>intermediate resistant. 2/3/4 MRGN: Multidrug-resistant Gram-negative bacteria with resistance against 2, 3 or 4 of the 4 antibiotic groups acylureidopenicillins, third-generation cephalosporins, carbapenems or fluoroquinolones; example 3MRGN: Resistance against 3 of the 4 antibiotic groups. VRE: Vancomycin-resistant *Enterococcus*. MSSA: Methicillin-susceptible *Staphylococcus aureus*. MRSA: Methicillin-resistant *Staphylococcus aureus*.

## Docking Study

Schrödinger Release 2023-3 (Glide, Schrödinger, LLC, New York, NY, 2023) was used for the docking study. Ligands were prepared using the default settings of LigPrep (Force field: OPLS4; Target pH:  $7.00 \pm 2.00$  using Epik Classic). The Cryo-EM structure was prepared with the standard settings of the Protein Preparation Workflow, which, among other things, involves the assignment of bond orders and the correct protonation state for pH 7.4, the optimization of the H-bond network, a minimization of the protein and the removal of irrelevant water molecules. The Receptor Grid Generator was used to prepare the protein grid necessary for Glide docking. Albi-1 was used to determine the size of the enclosing box, since cystobactamids have a comparable size. Docking of the ligands was performed using Glide. The following settings were used: Precision: XP (extra precision); Ligand sampling: flexible; Intramolecular hydrogen bonds were rewarded. Since a pose determined for the double-deprotonated Albi-1 was closest to the natural pose found in the cryo-EM structure, the cystobactamids were also docked in the double-deprotonated form.

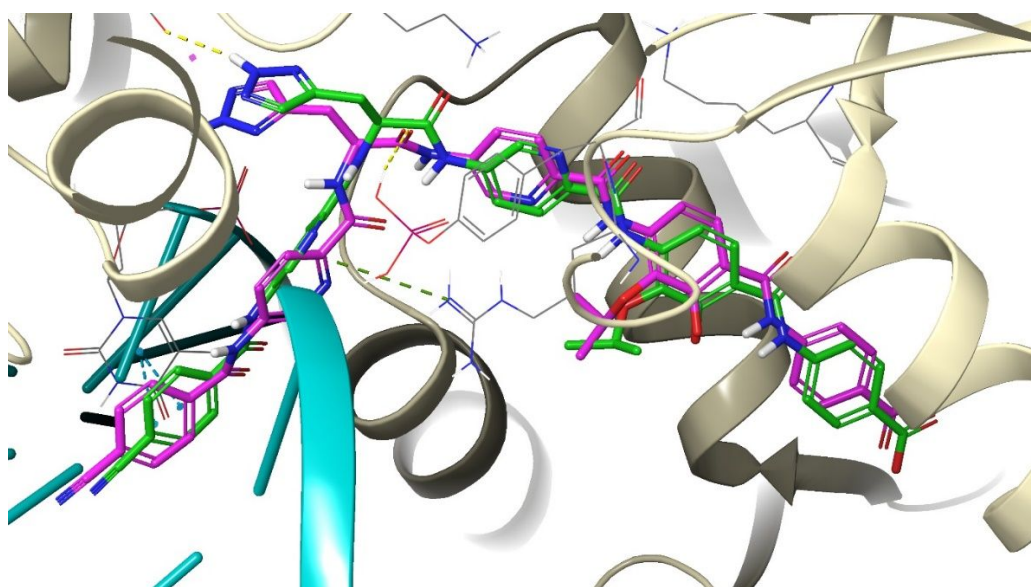

Figure S1. Cryo-EM structure of Albi-1 (green ligand) in *E. coli* gyrase holocomplex with 217 bp DNA (PDB: 7Z9K).<sup>1</sup> Double deprotonated Albi-1 (magenta ligand) docked into the protein-DNA complex with Glide.<sup>2</sup>

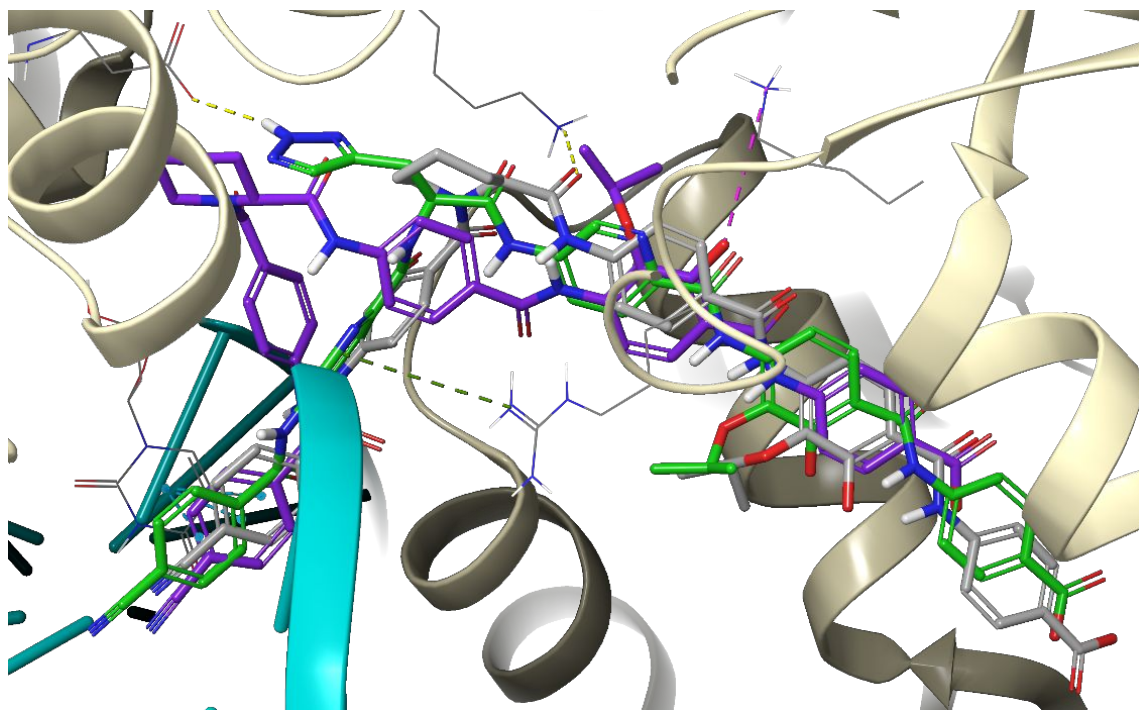

Figure S2. Cryo-EM structure of Albi-1 (green ligand) in *E. coli* gyrase (beige) holocomplex with 217 bp DNA (cyan) (PDB: 7Z9K).<sup>1</sup> **17** (grey ligand) and **18** (purple ligand) were modeled into the protein-DNA complex with Glide.<sup>2</sup>

Table S6. Docking scores of the obtained poses for the double deprotonated **17** and **18**.

| Compound  | Docking Score |
|-----------|---------------|
| <b>17</b> | -7.25         |
| <b>17</b> | -6.03         |
| <b>17</b> | -4.97         |
| <b>17</b> | -4.06         |
| <b>17</b> | -3.17         |
| <b>18</b> | -1.66         |
| <b>17</b> | -0.96         |
| <b>18</b> | -0.68         |
| <b>17</b> | -0.32         |
| <b>18</b> | -0.27         |
| <b>18</b> | 1.54          |
| <b>18</b> | 3.58          |

Table S7: Mass transitions of the internal standard (caffeine), controls and cystobactamids.

|                     | Q1 mass | Q3 mass | DP [V] | CE [V] | CXP [V] |
|---------------------|---------|---------|--------|--------|---------|
| <b>caffeine</b>     | 195.024 | 138.0   | 130    | 25     | 14      |
|                     |         | 110.0   | 130    | 25     | 14      |
| <b>naproxen</b>     | 231.106 | 185.1   | 80     | 19     | 10      |
|                     |         | 170.2   | 80     | 33     | 12      |
| <b>procaine</b>     | 235.744 | 163.0   | 80     | 21     | 18      |
|                     |         | 120.0   | 80     | 39     | 12      |
| <b>procainamide</b> | 236.773 | 100.0   | 80     | 21     | 12      |
|                     |         | 120.0   | 80     | 31     | 14      |
| <b>propoxycaine</b> | 294.738 | 100.1   | 80     | 17     | 12      |
|                     |         | 178.1   | 80     | 21     | 20      |
| <b>verapamil</b>    | 454.688 | 165.0   | 1      | 35     | 28      |
|                     |         | 303.1   | 1      | 35     | 18      |
| <b>CN-CC-861</b>    | 791.115 | 432.0   | -240   | -52    | -21     |
|                     |         | 748.1   | -240   | -38    | -39     |
| <b>16</b>           | 846.140 | 765.0   | -165   | -38    | -45     |
|                     |         | 432.0   | -165   | -60    | -47     |
| <b>24</b>           | 807.307 | 431.9   | -215   | -56    | -41     |
|                     |         | 764.1   | -215   | -38    | -13     |
| <b>26</b>           | 782.098 | 294.9   | -215   | -74    | -19     |
|                     |         | 432.0   | -165   | -54    | -37     |
| <b>38</b>           | 805.135 | 739.2   | -165   | -44    | -17     |
|                     |         | 432.0   | -170   | -54    | -19     |
| <b>39</b>           | 805.129 | 762.2   | -170   | -40    | -37     |
|                     |         | 432.0   | -300   | -54    | -19     |
| <b>41</b>           | 799.206 | 762.1   | -300   | -38    | -35     |
|                     |         | 469.0   | 141    | 25     | 30      |
| <b>42</b>           | 799.204 | 450.1   | 141    | 19     | 22      |
|                     |         | 469.0   | 156    | 23     | 22      |
|                     |         | 313.1   | 156    | 25     | 28      |
|                     | 821.171 | 684.1   | 251    | 43     | 44      |
|                     |         | 641.0   | 251    | 57     | 52      |

DP: declustering potential; CE: collision energy; CXP: collision cell exit potential.

## Synthesis of Cystobactamide Derivatives

**tert-Butyl 4-[4-(4-aminobenzamido)-2-(prop-2-en-1-yloxy)-3-(propan-2-yloxy)benzamido]benzoate (8)**

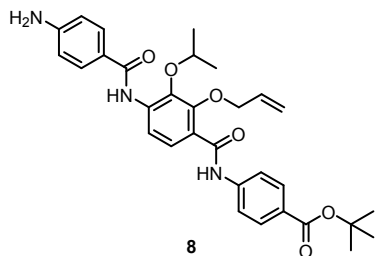

The compound was prepared according to the established literature procedure; see M. Moeller, M. D. Norris, T. Planke, K. Cirnski, J. Herrmann, R. Müller, A. Kirschning, *Organic Letters* **2019**, 21, 8369-8372.

**4-(4-Cyanobenzamido)benzoic acid (10)**

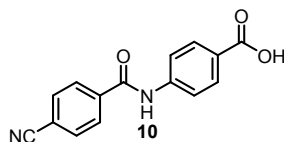

The compound was prepared according to the established literature procedure; see Dong, Y. *et al.*; *Bioorg. Med. Chem. Lett.* **2014**, 24, 3, 944-948.

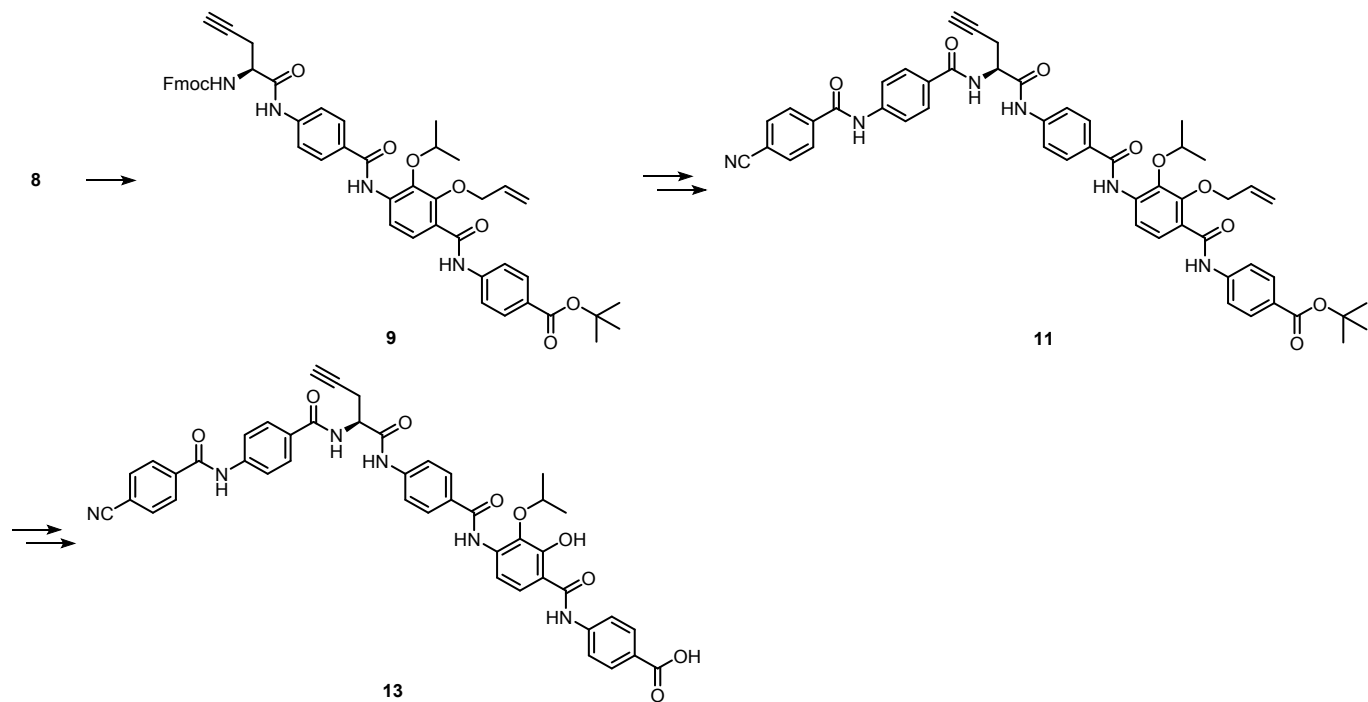

Scheme S1. Synthesis of compound **13** (CN-CC-861).

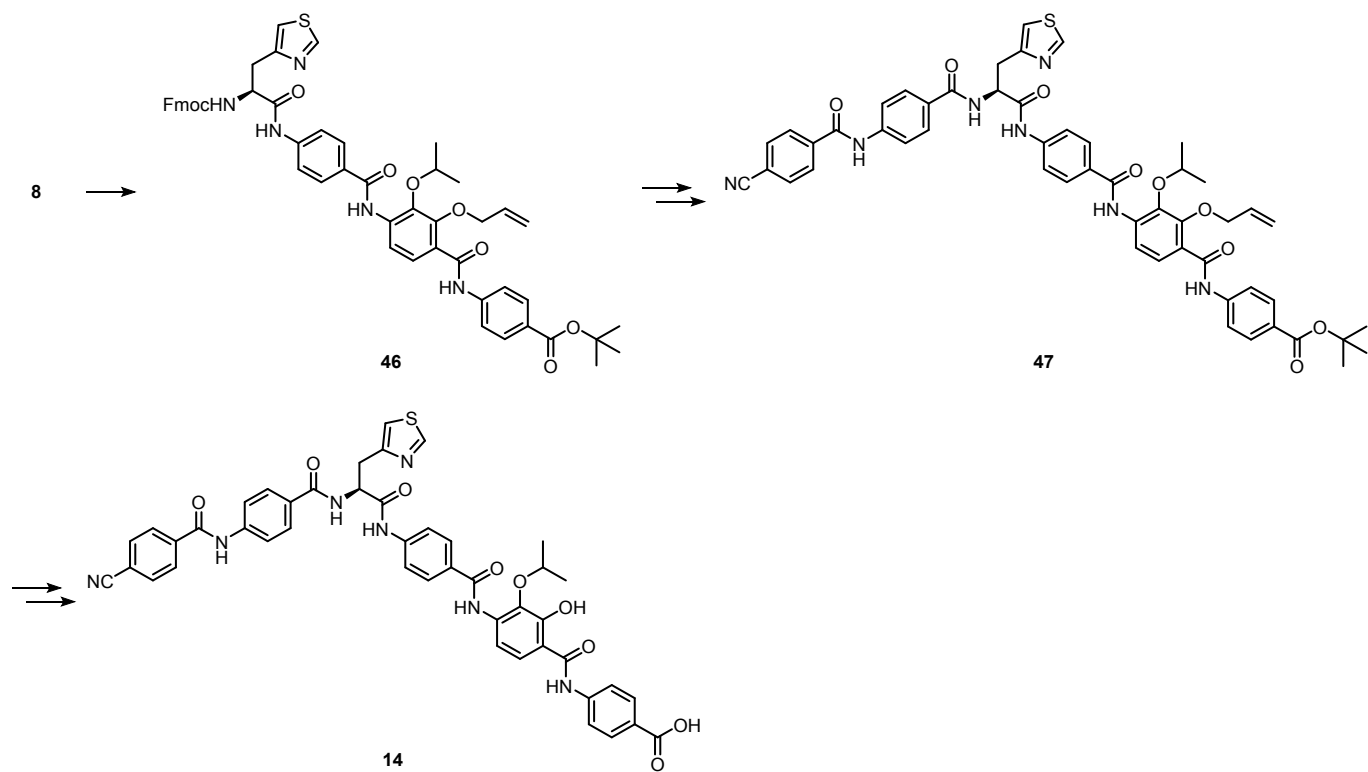

Scheme S2. Synthesis of compound **14**.



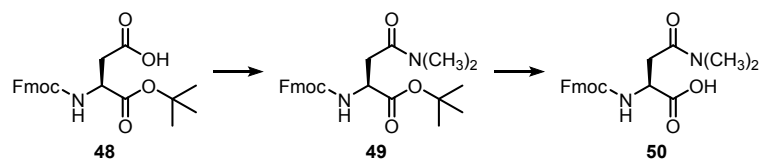

Scheme S3. Synthesis of compound **50**.

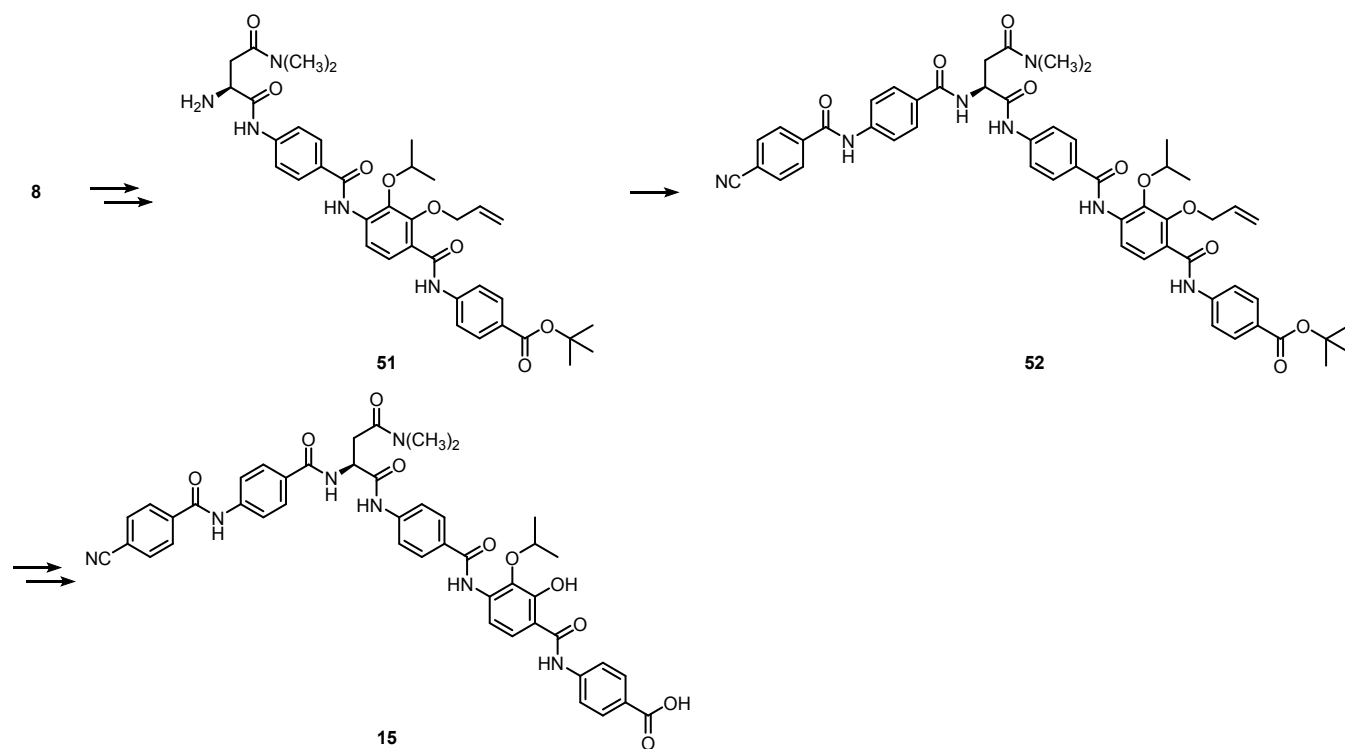

Scheme S4. Synthesis of compound **15**.

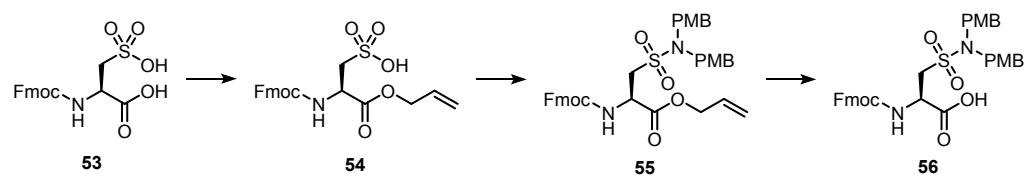

Scheme S5. Synthesis of compound **56**.

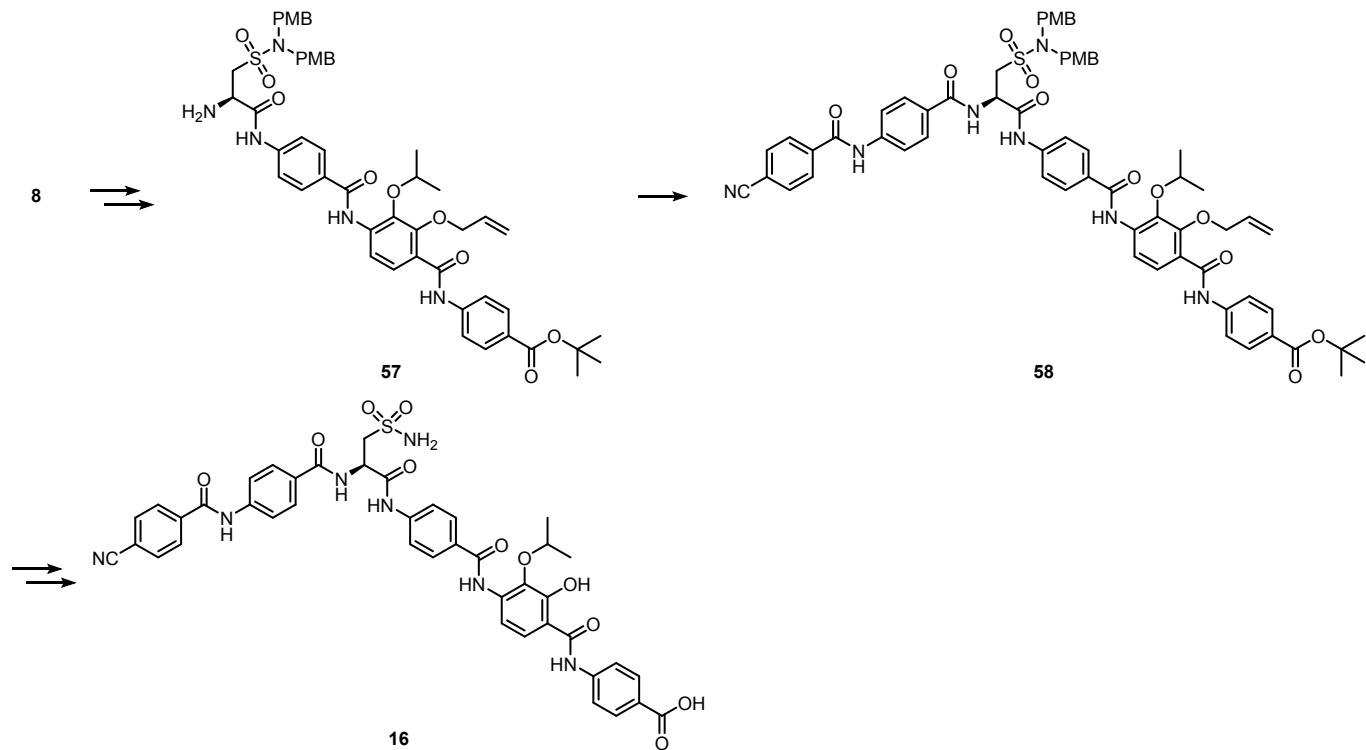

Scheme S6. Synthesis of compound **16**.

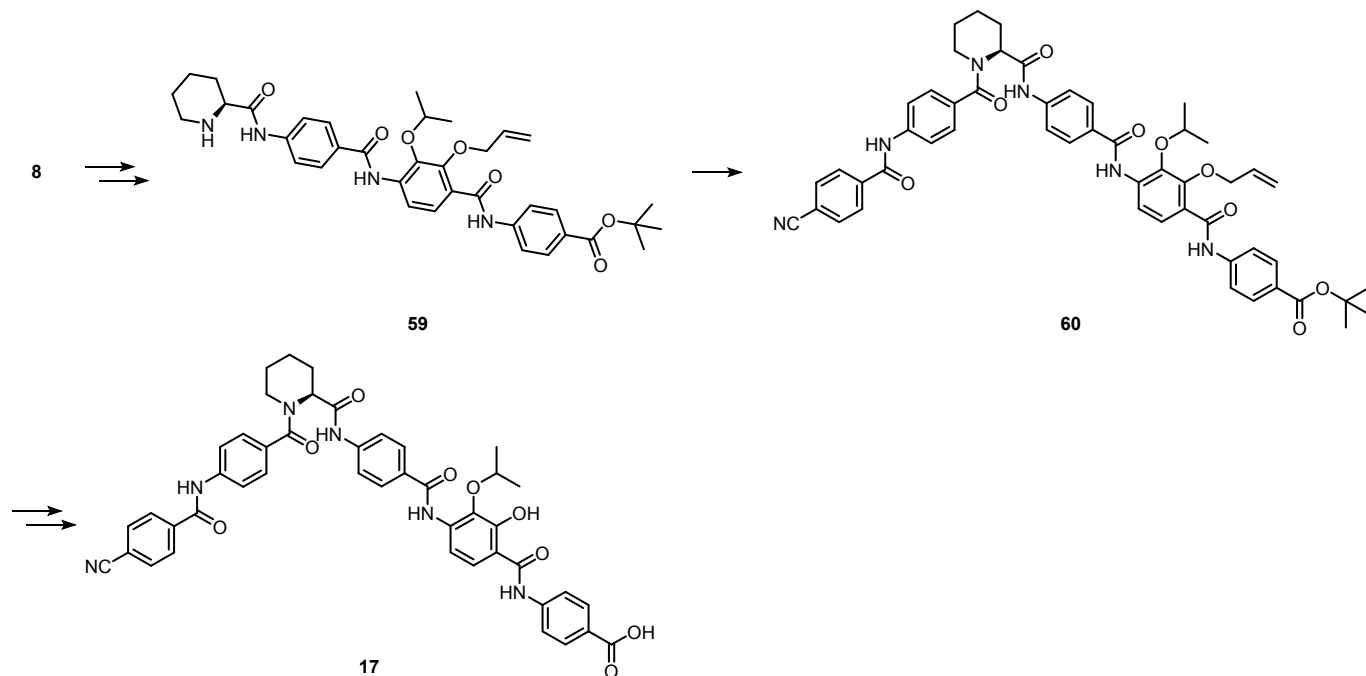

Scheme S7. Synthesis of compound **17**.

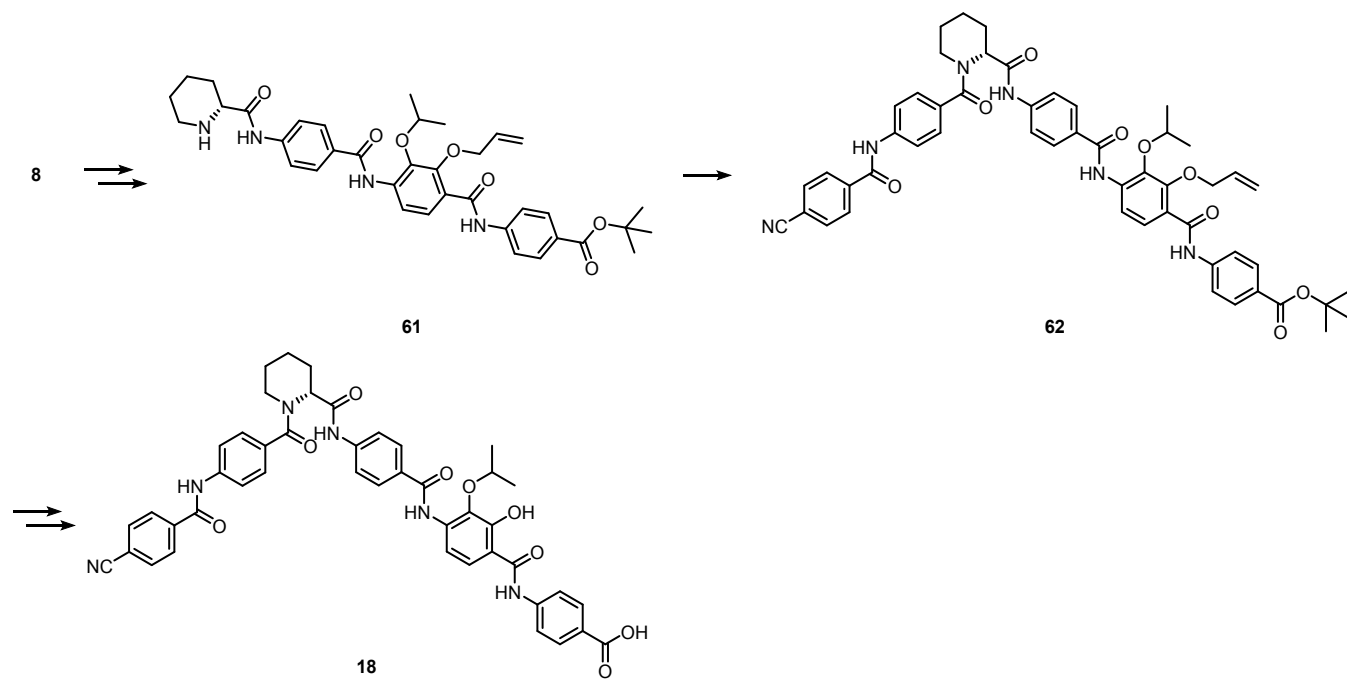

Scheme S8. Synthesis of compound **18**.

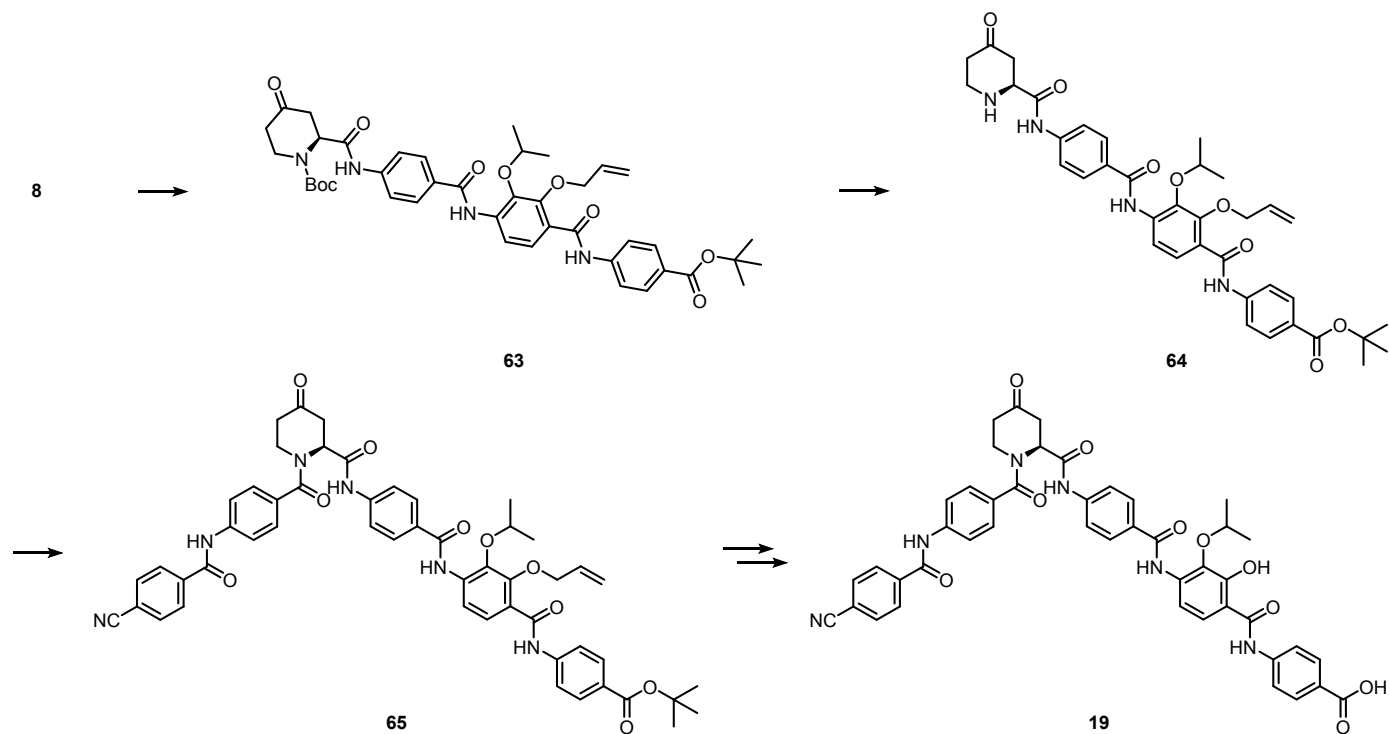

Scheme S9. Synthesis of compound **19**.

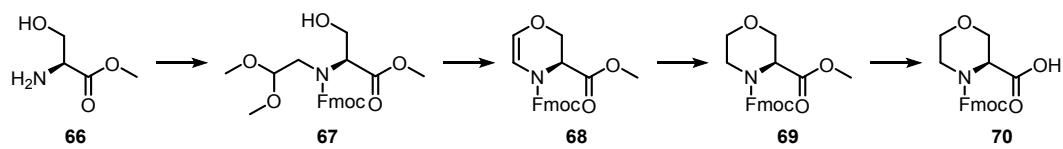

Scheme S10. Synthesis of compound **70**.

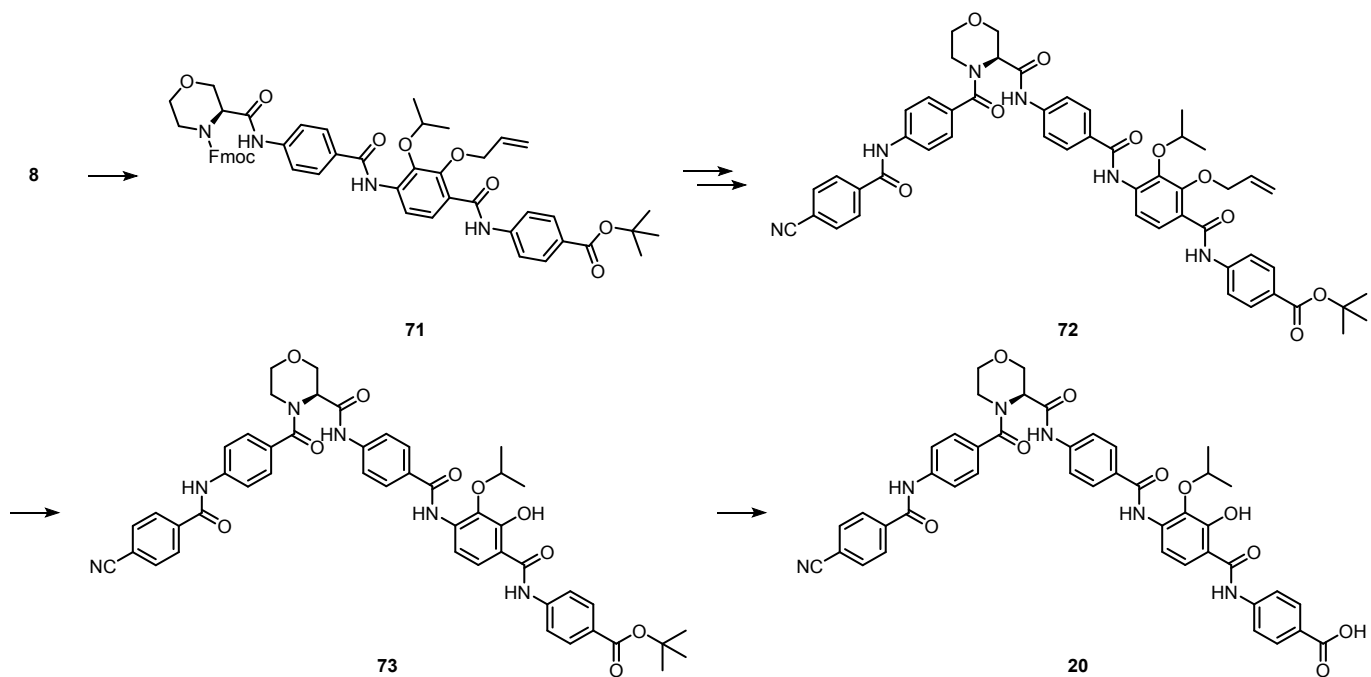

Scheme S11. Synthesis of compound **20**.

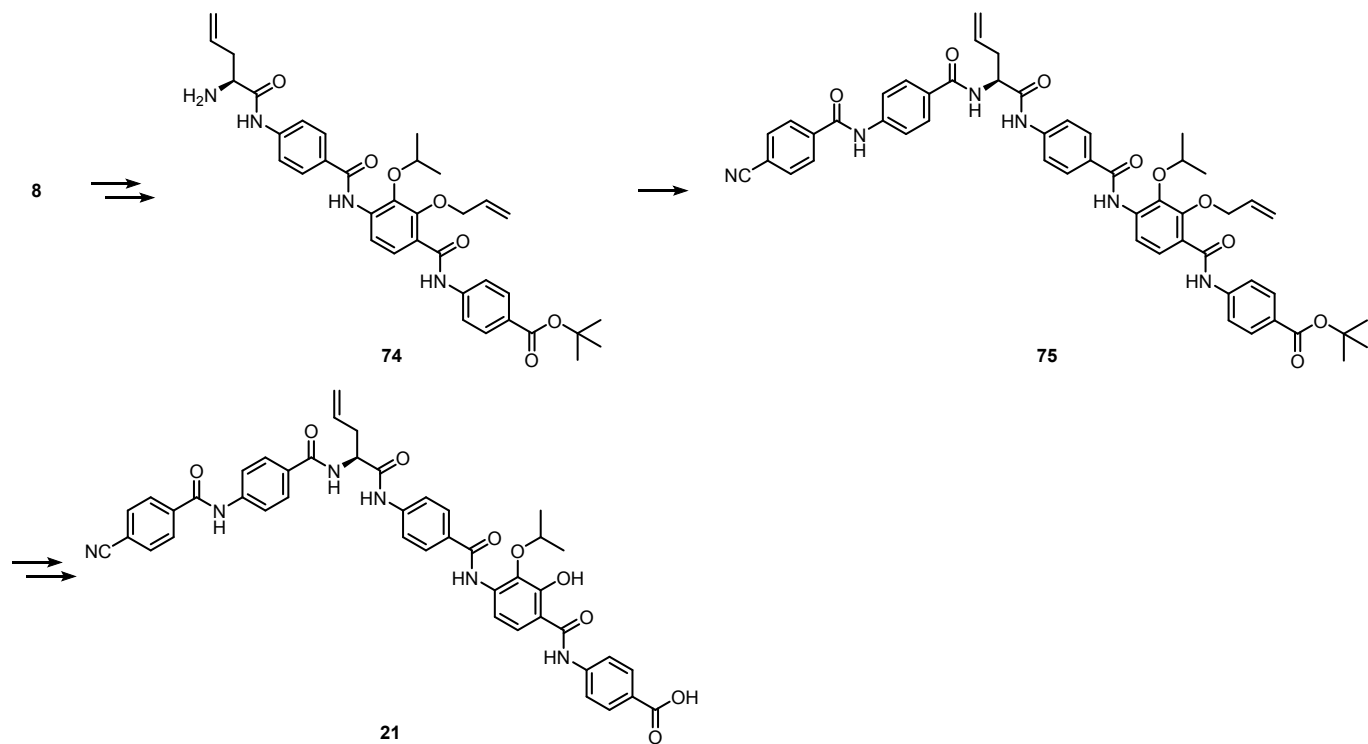

Scheme S12. Synthesis of compound **21**.

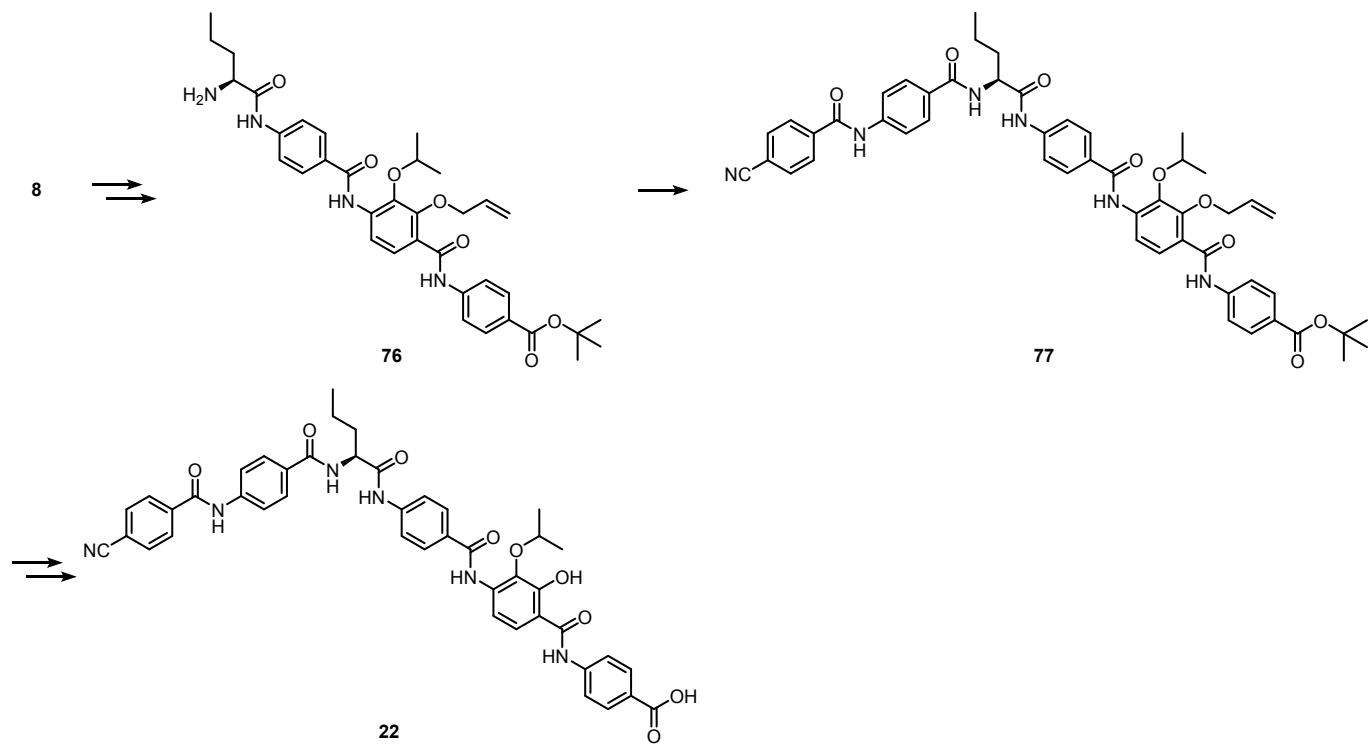

Scheme S13. Synthesis of compound **22**.

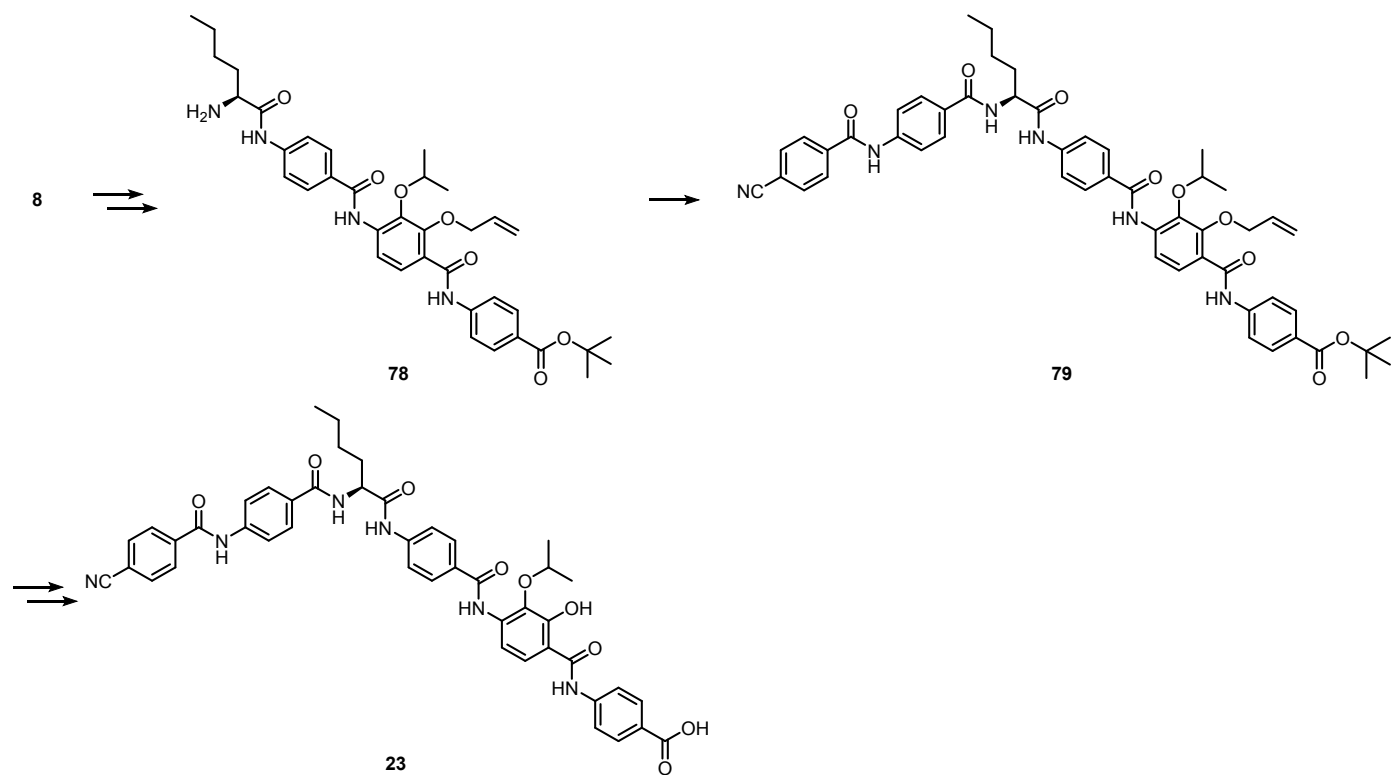

Scheme S14. Synthesis of compound **23**.

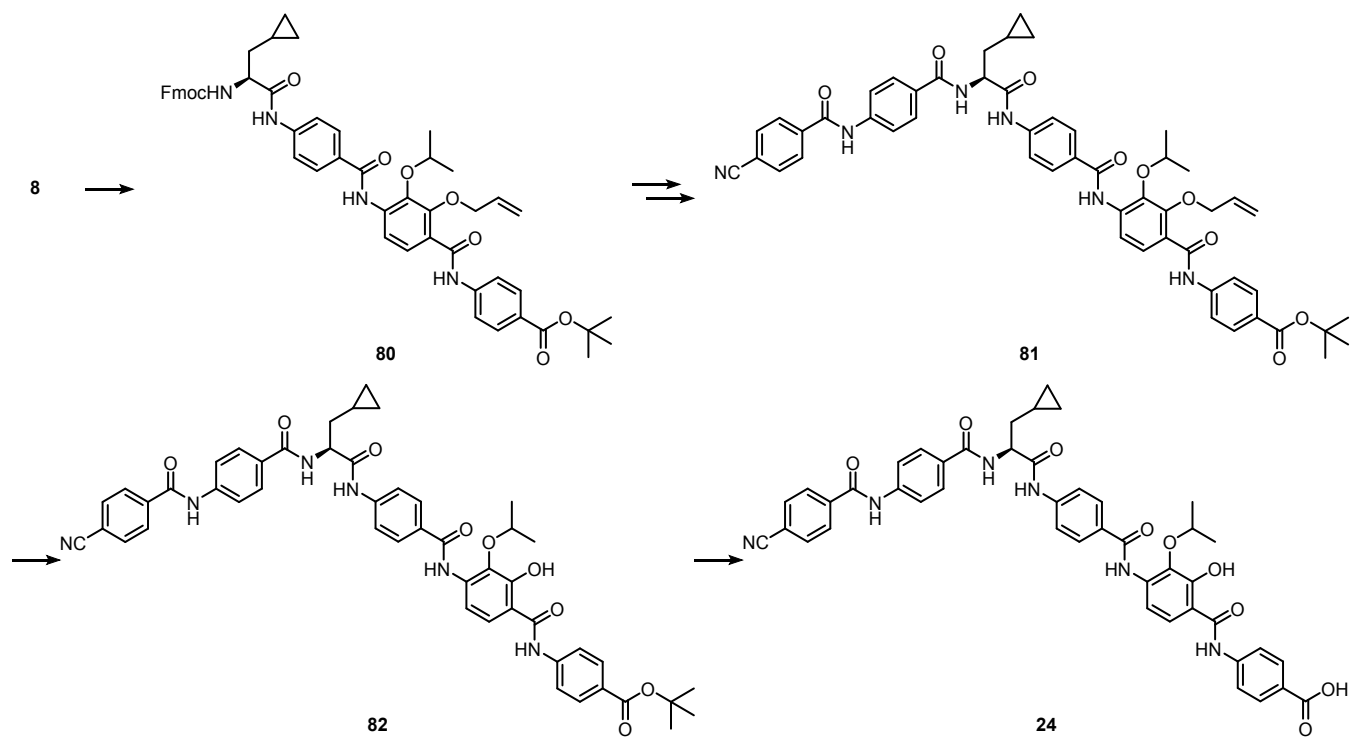

Scheme S15. Synthesis of compound **24**.

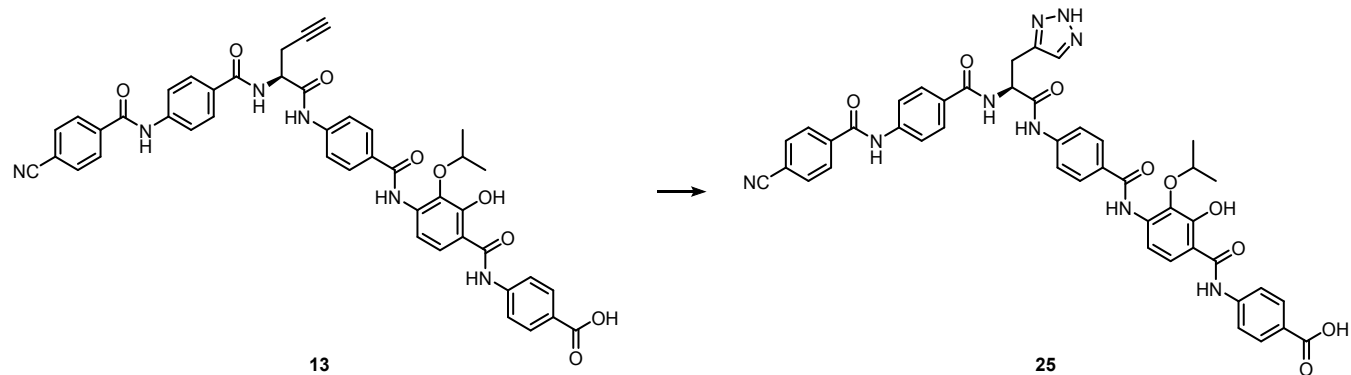

Scheme S16. Synthesis of compound **25**.

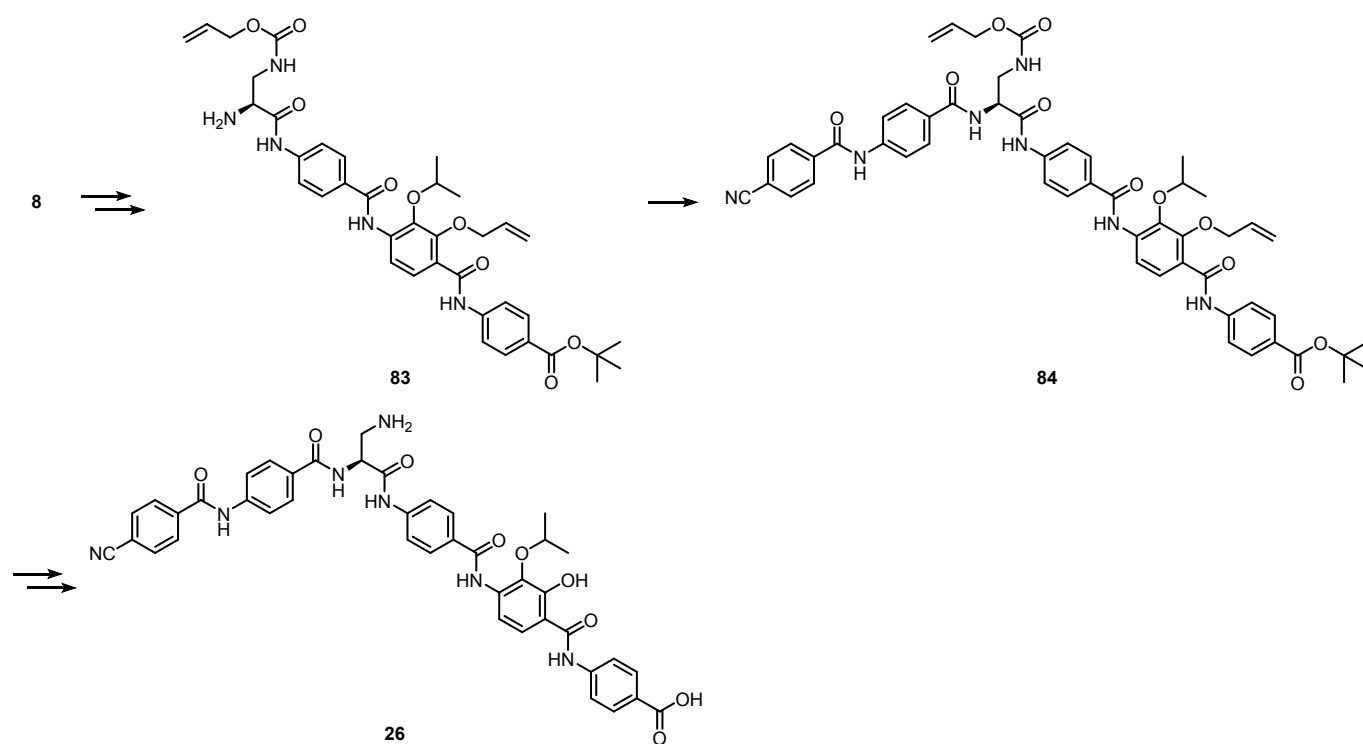

Scheme S17. Synthesis of compound **26**.

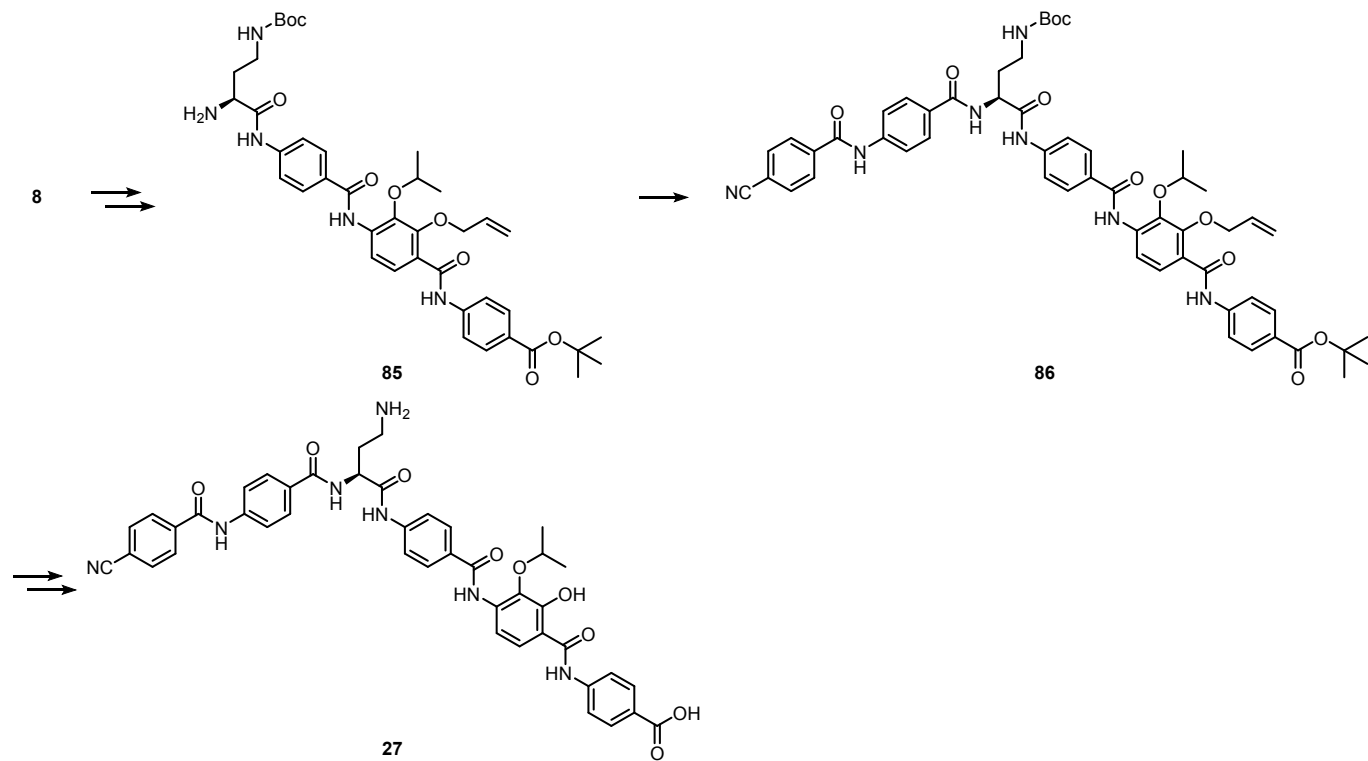

Scheme S18. Synthesis of compound **27**.

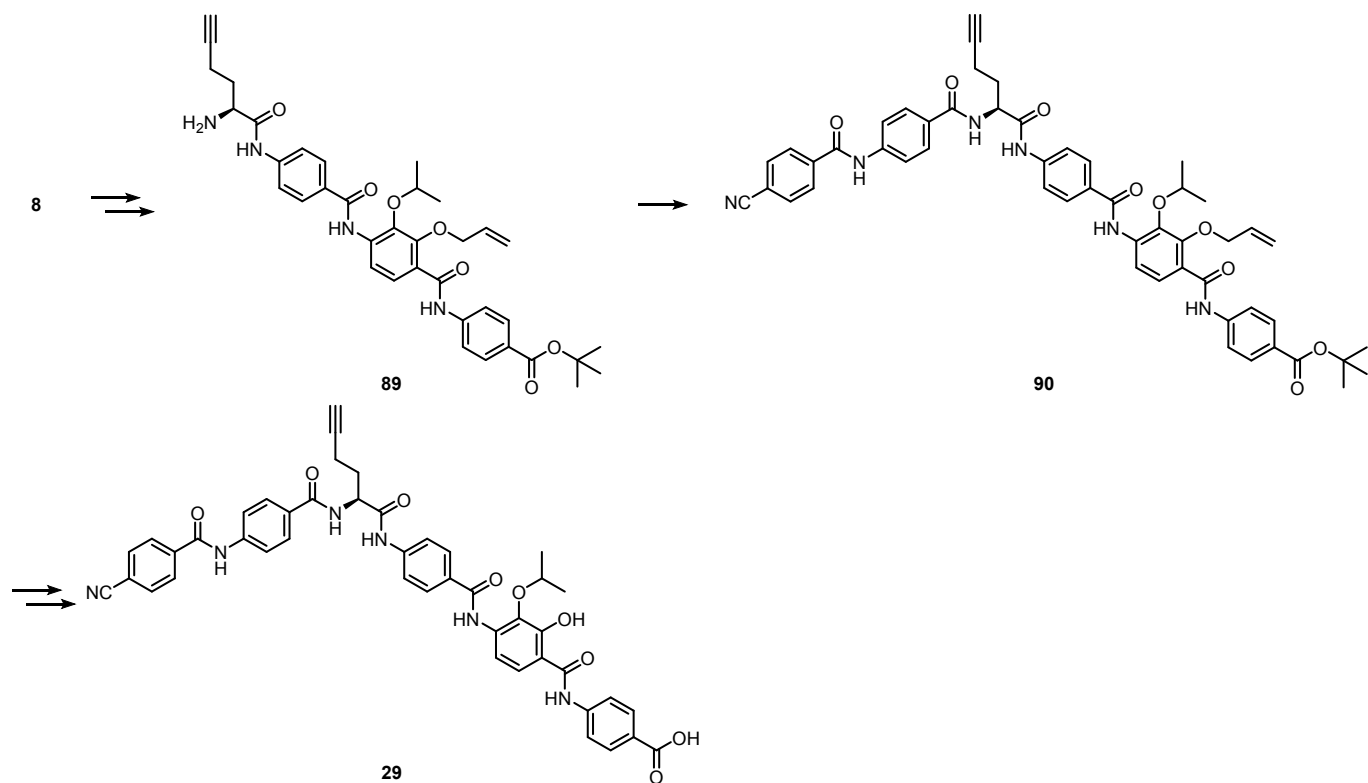

Scheme S19. Synthesis of compound **29**.



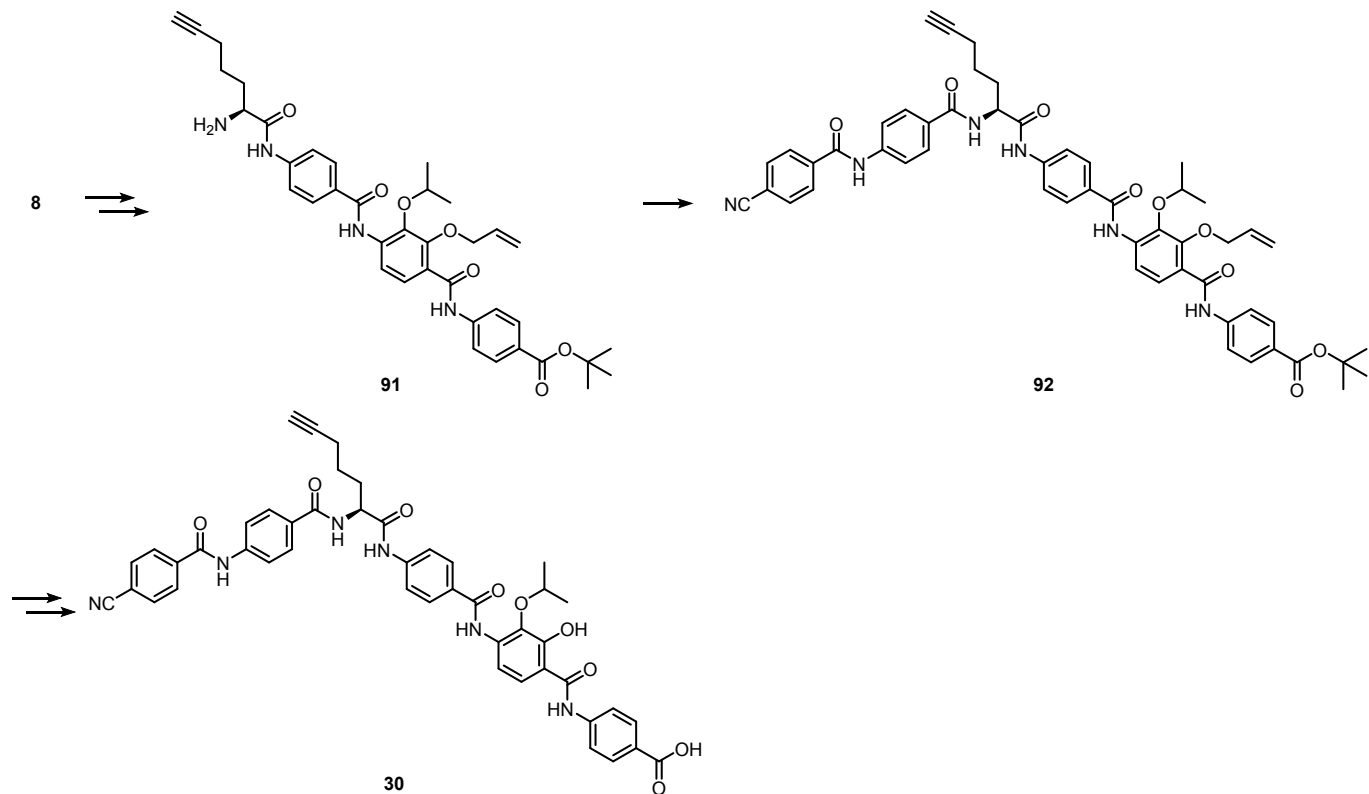

Scheme S20. Synthesis of compound **30**.

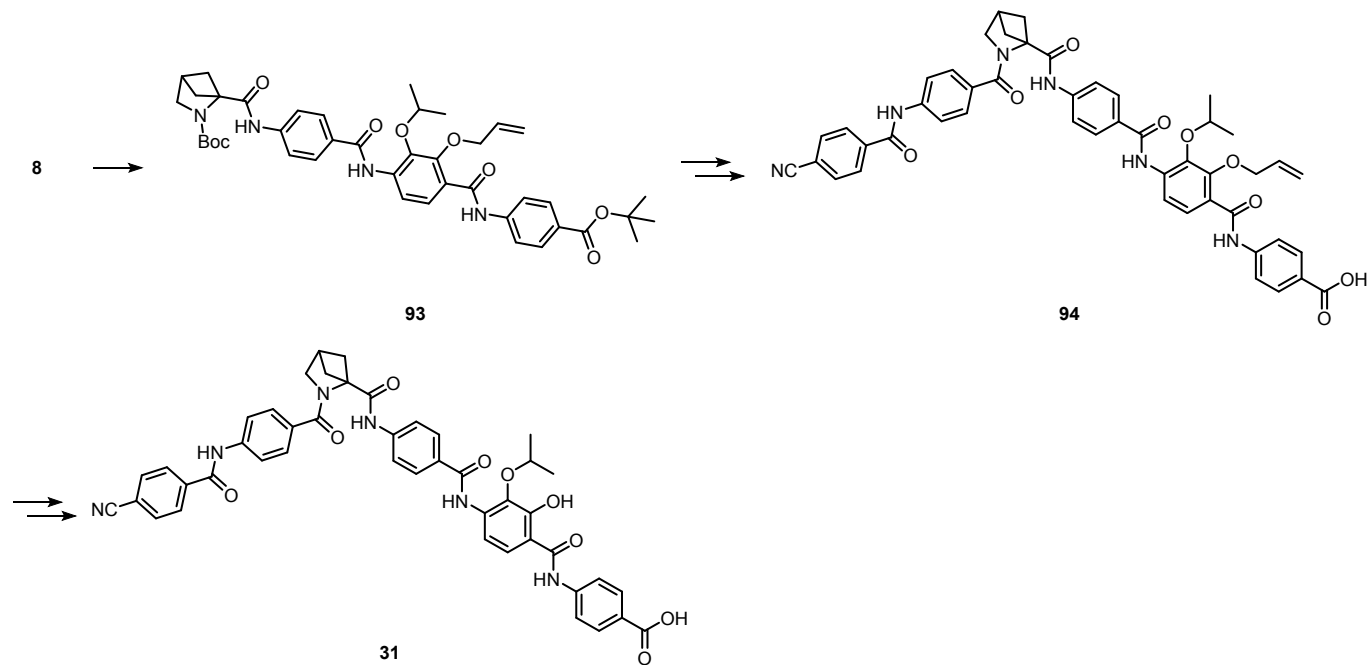

Scheme S21. Synthesis of compound **31**.

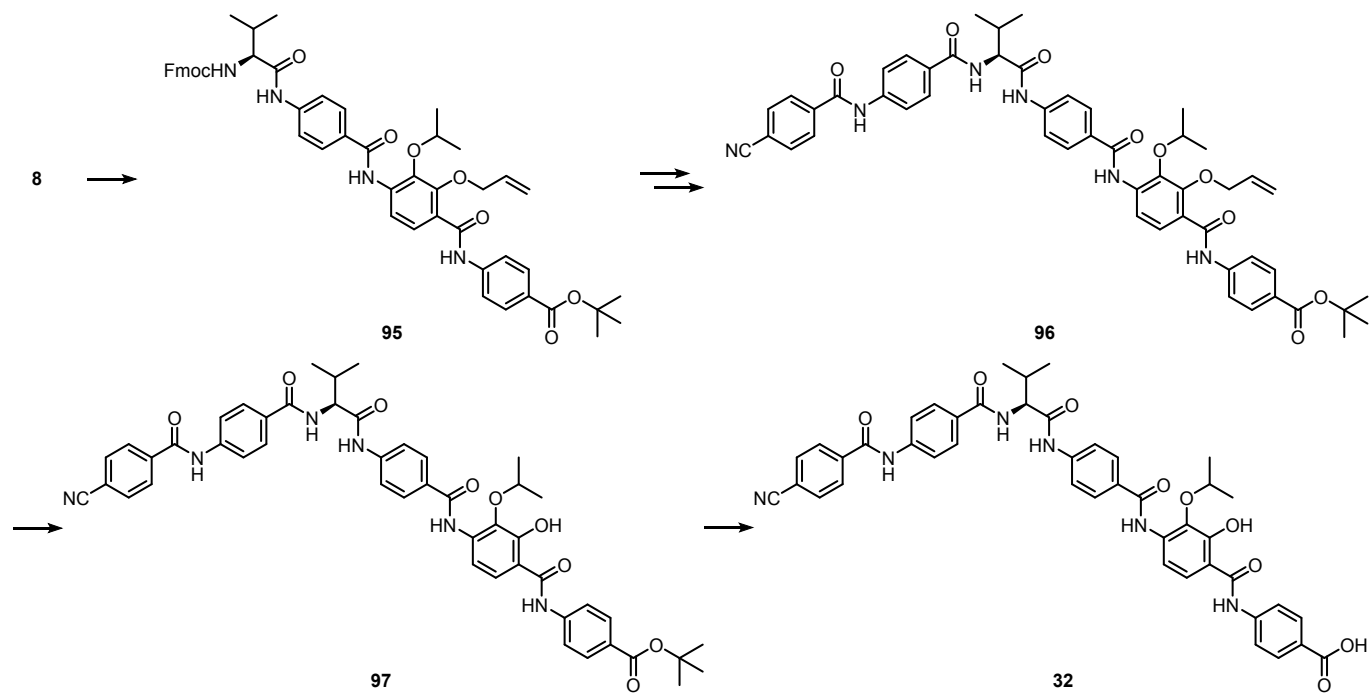

Scheme S22. Synthesis of compound **32**.

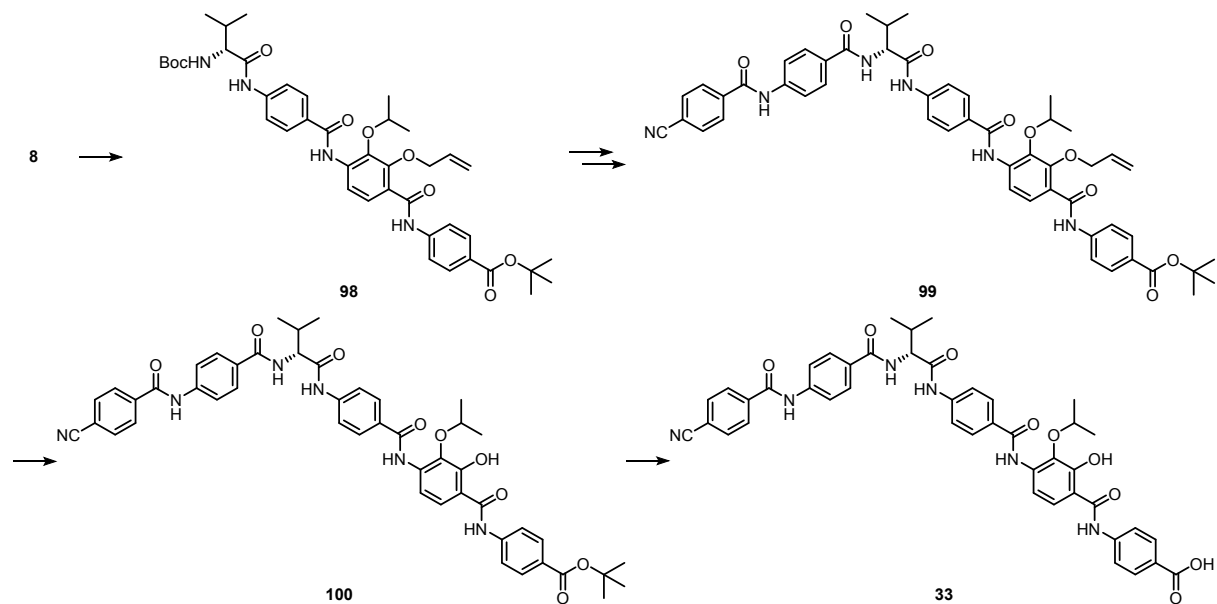

Scheme S23. Synthesis of compound **33**.

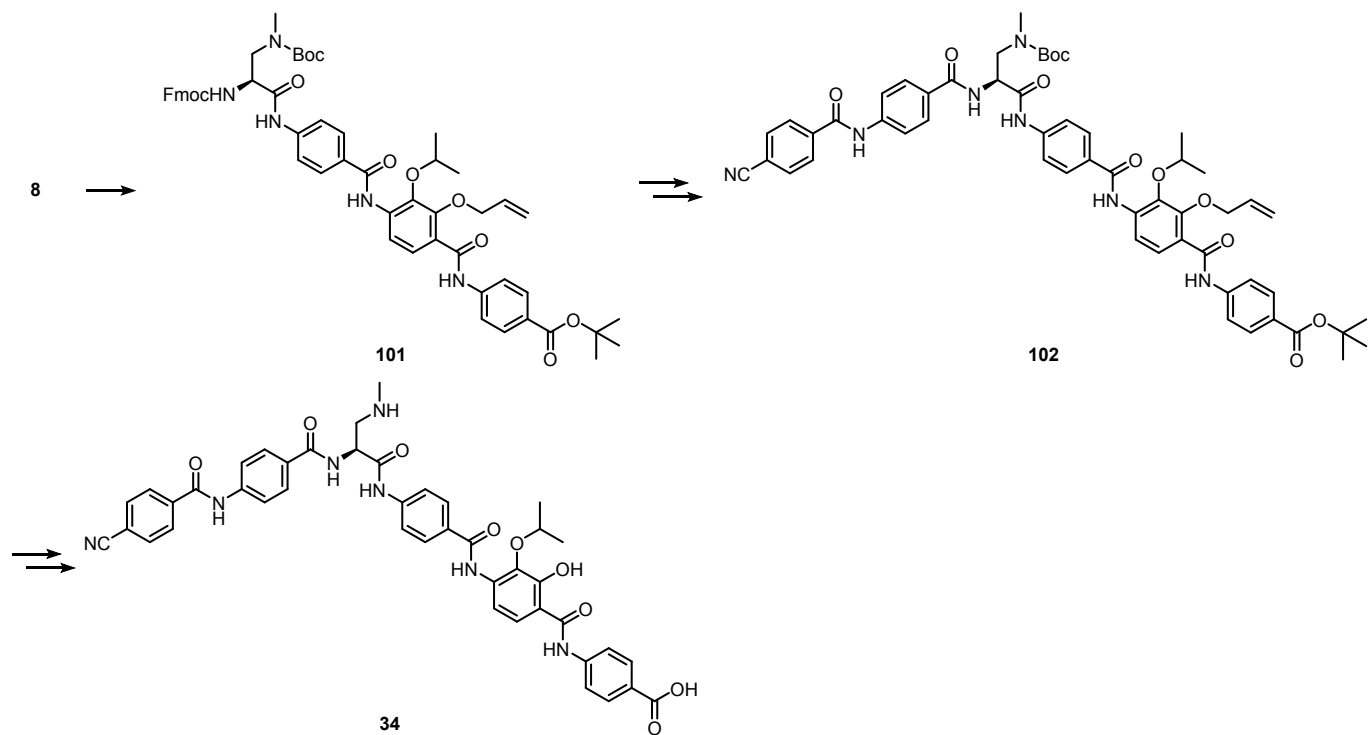

Scheme S24. Synthesis of compound **34**.

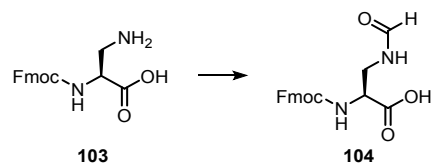

Scheme S25. Synthesis of compound **104**.

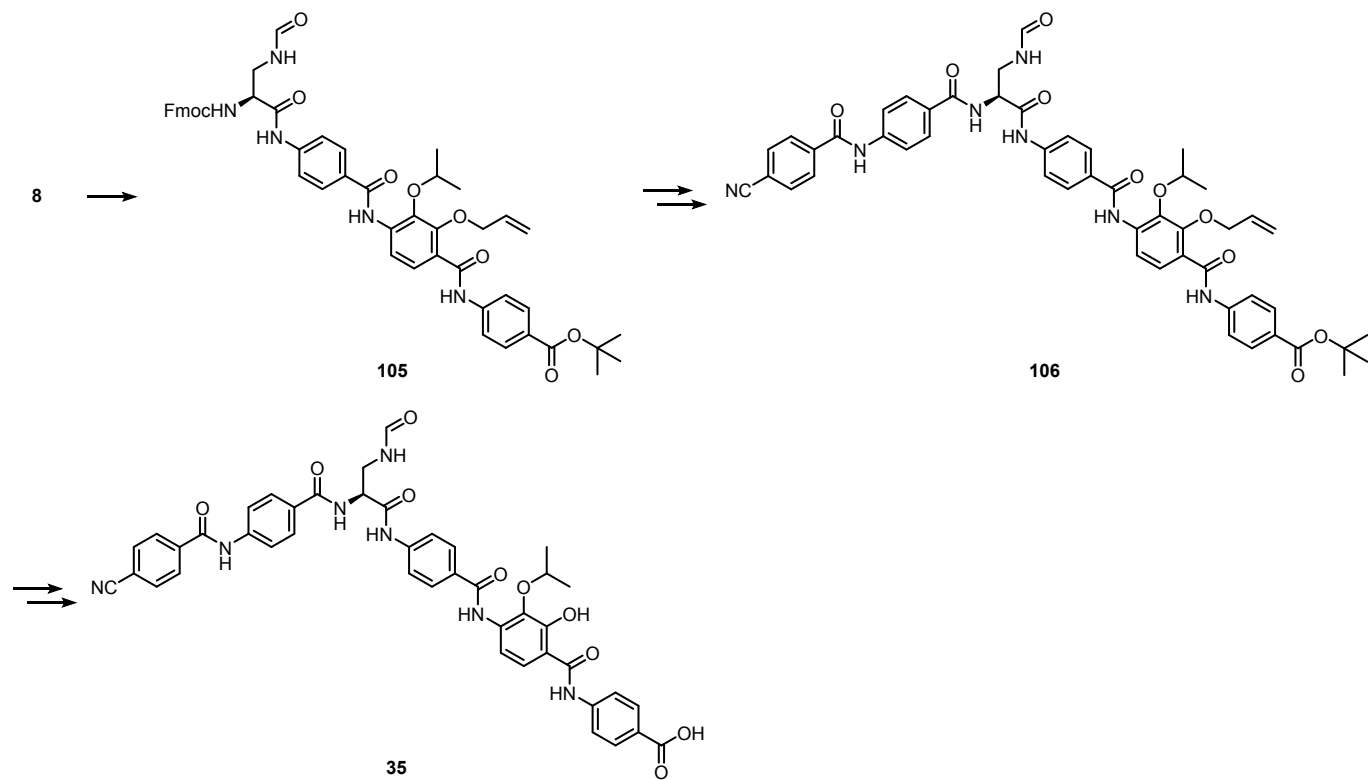

Scheme S26. Synthesis of compound **35**.

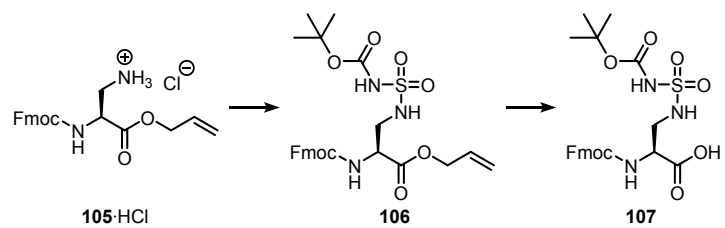

Scheme S27. Synthesis of compound **107**.

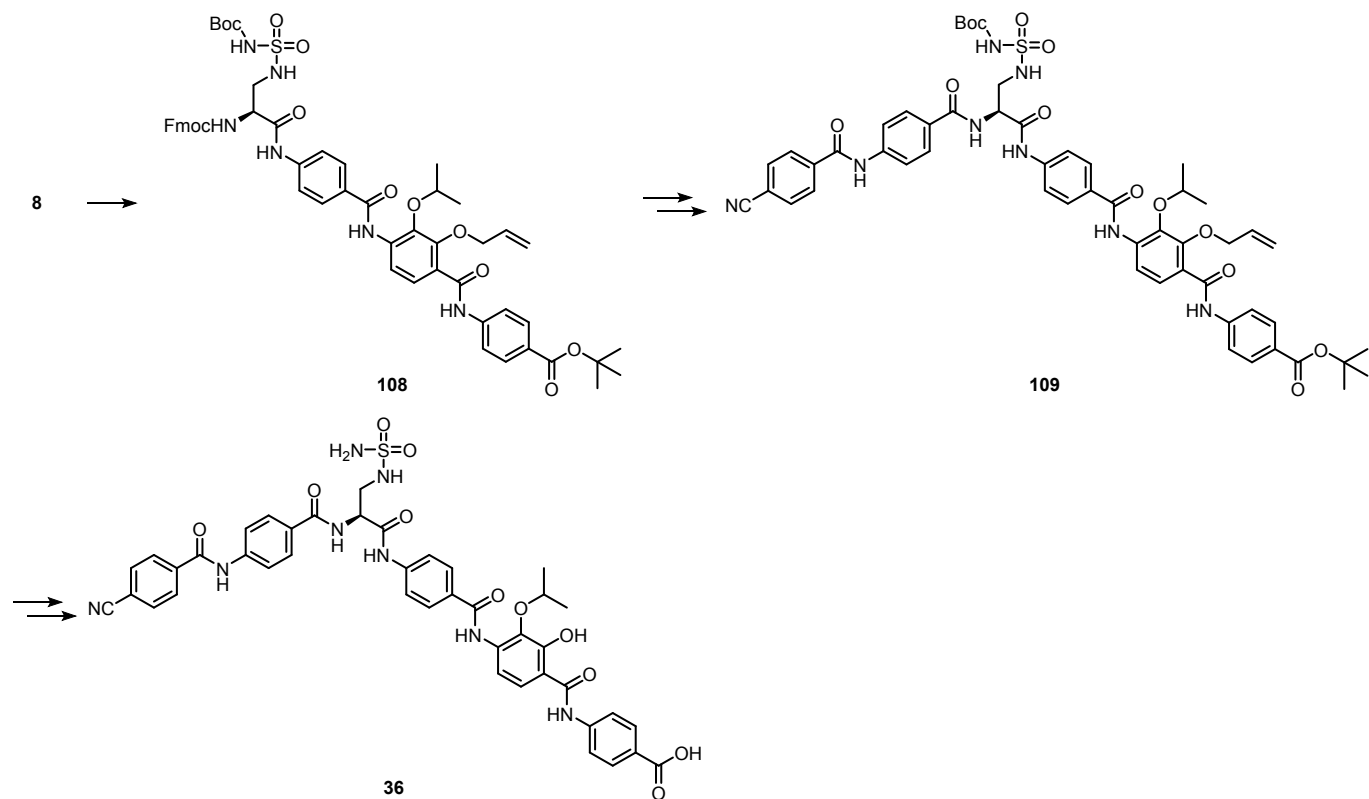

Scheme S28. Synthesis of compound **36**.

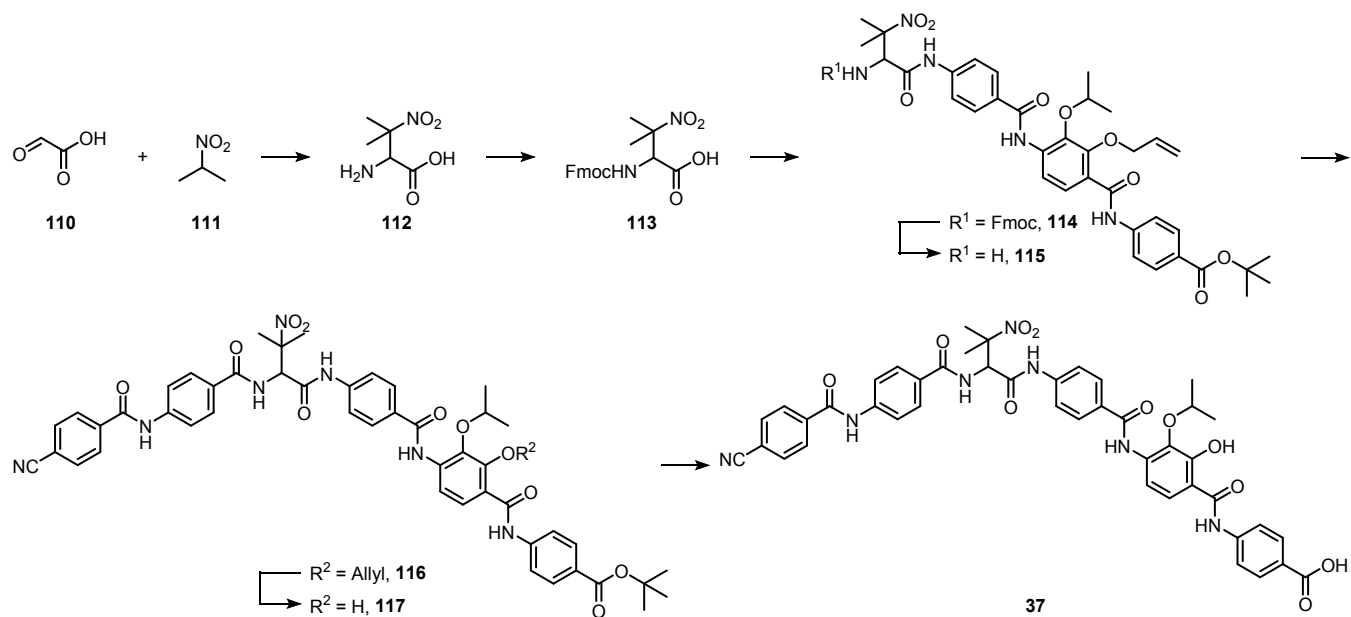

Scheme S29. Synthesis of compound **37**.

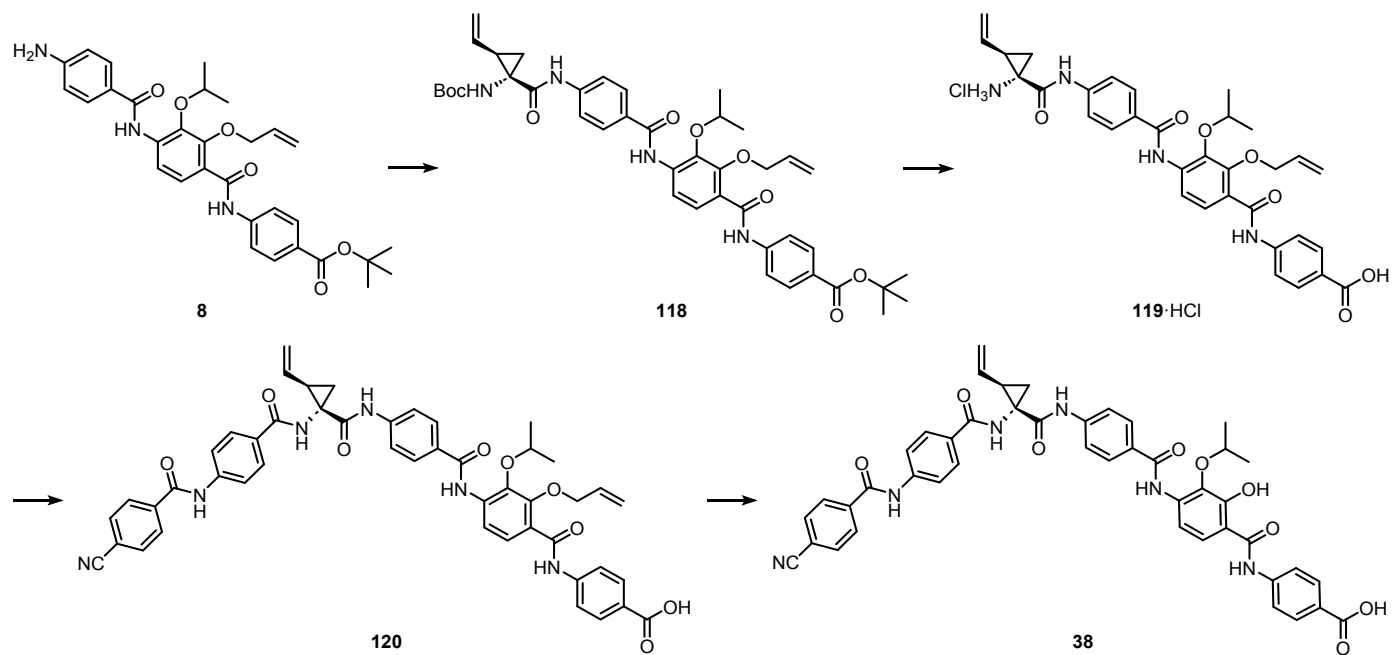

Scheme S30. Synthesis of compound **38**.

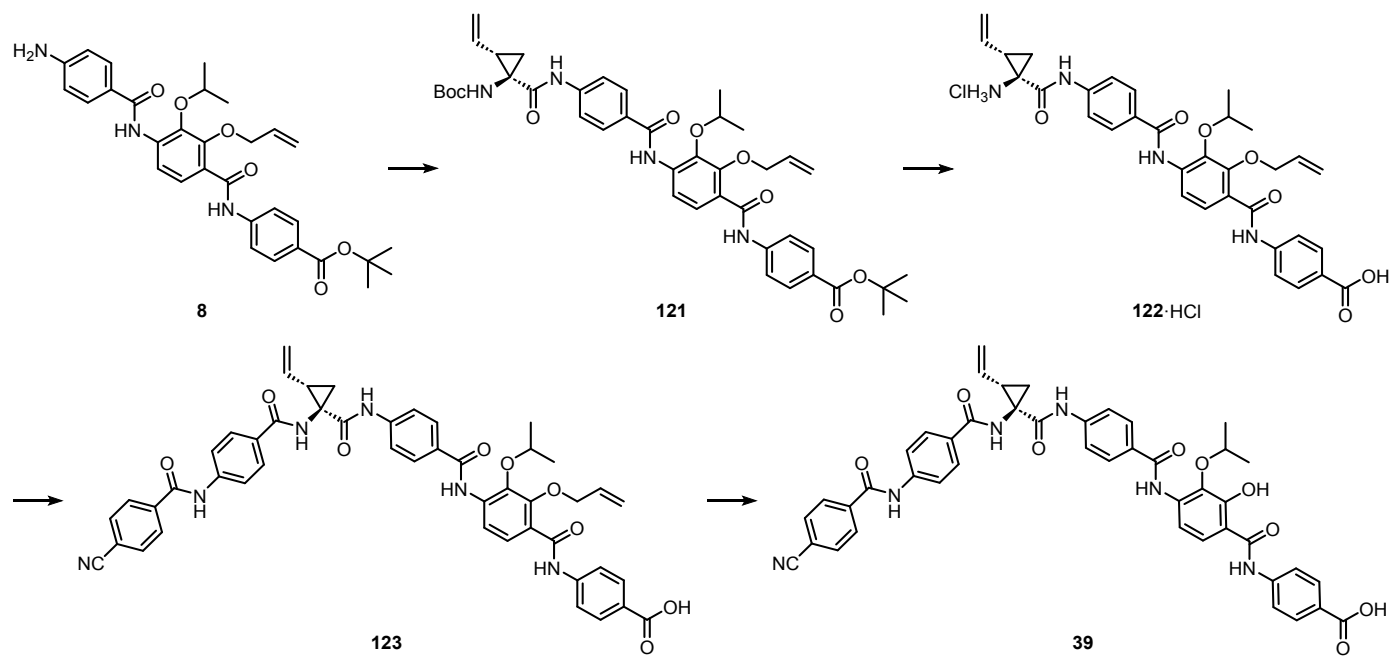

Scheme S31. Synthesis of compound **39**.

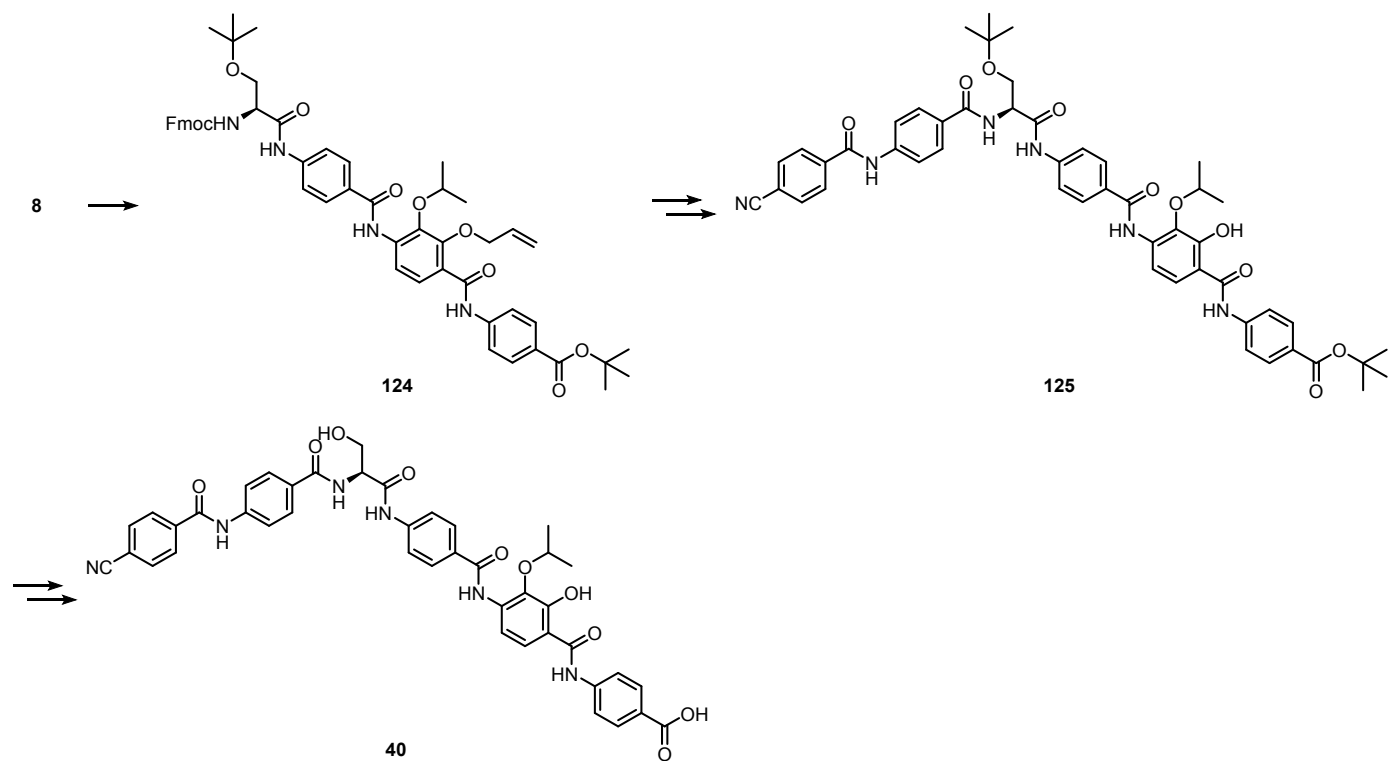

Scheme S32. Synthesis of compound **40**.

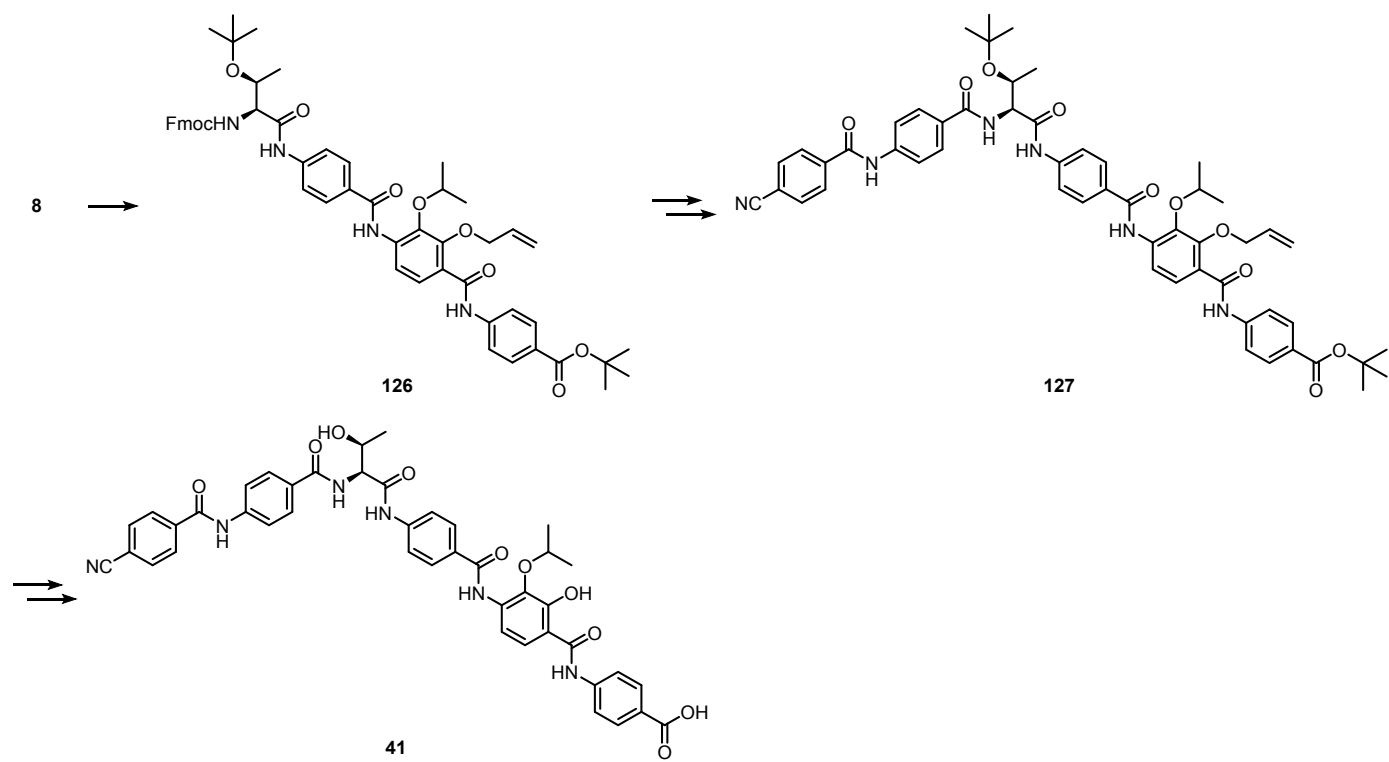

Scheme S33. Synthesis of compound **41**.

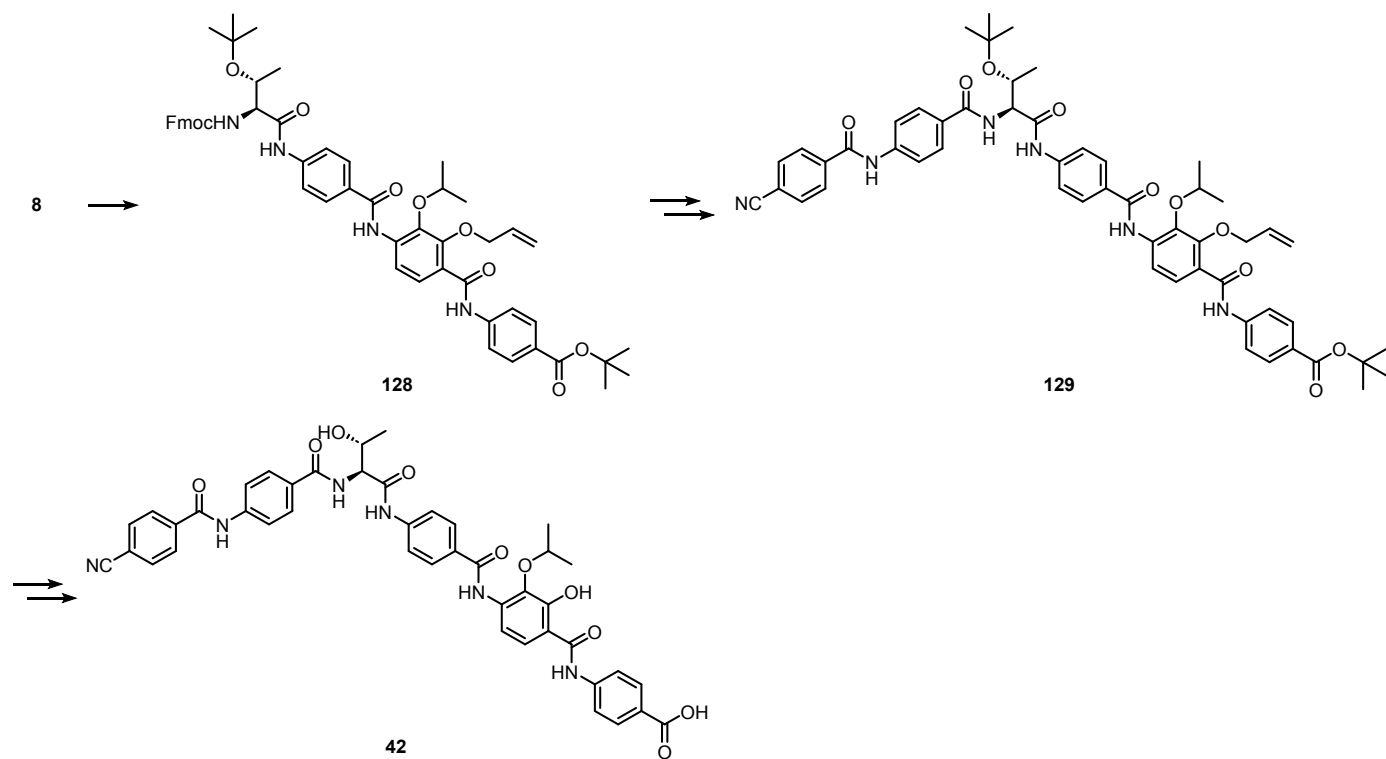

Scheme S34. Synthesis of compound **42**.

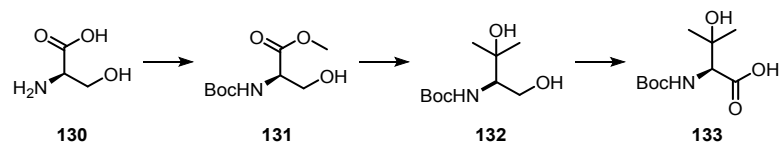

Scheme S35. Synthesis of compound **133**.



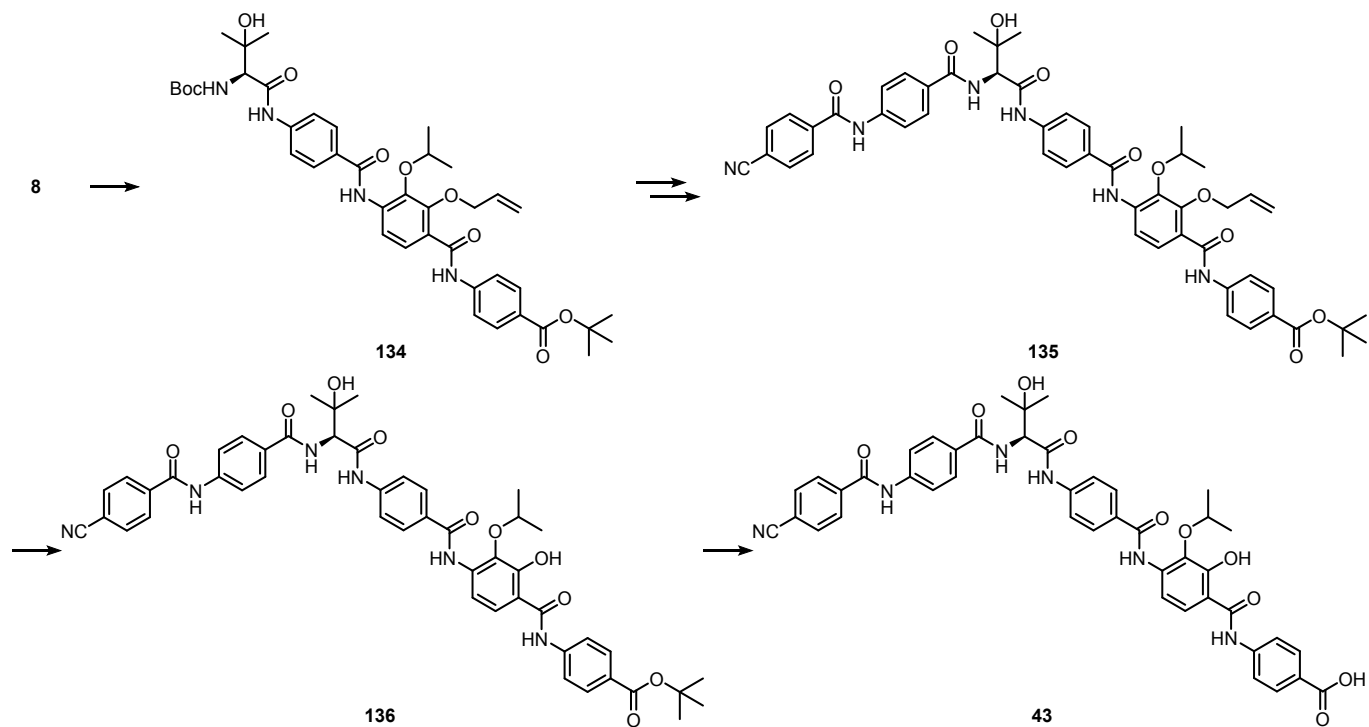

Scheme S36. Synthesis of compound **43**.

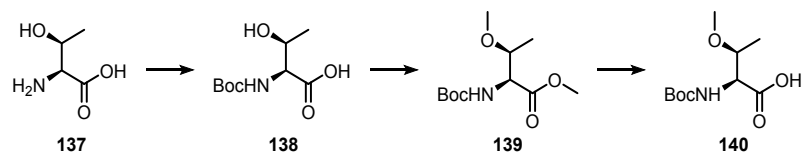

Scheme S37. Synthesis of compound **140**.

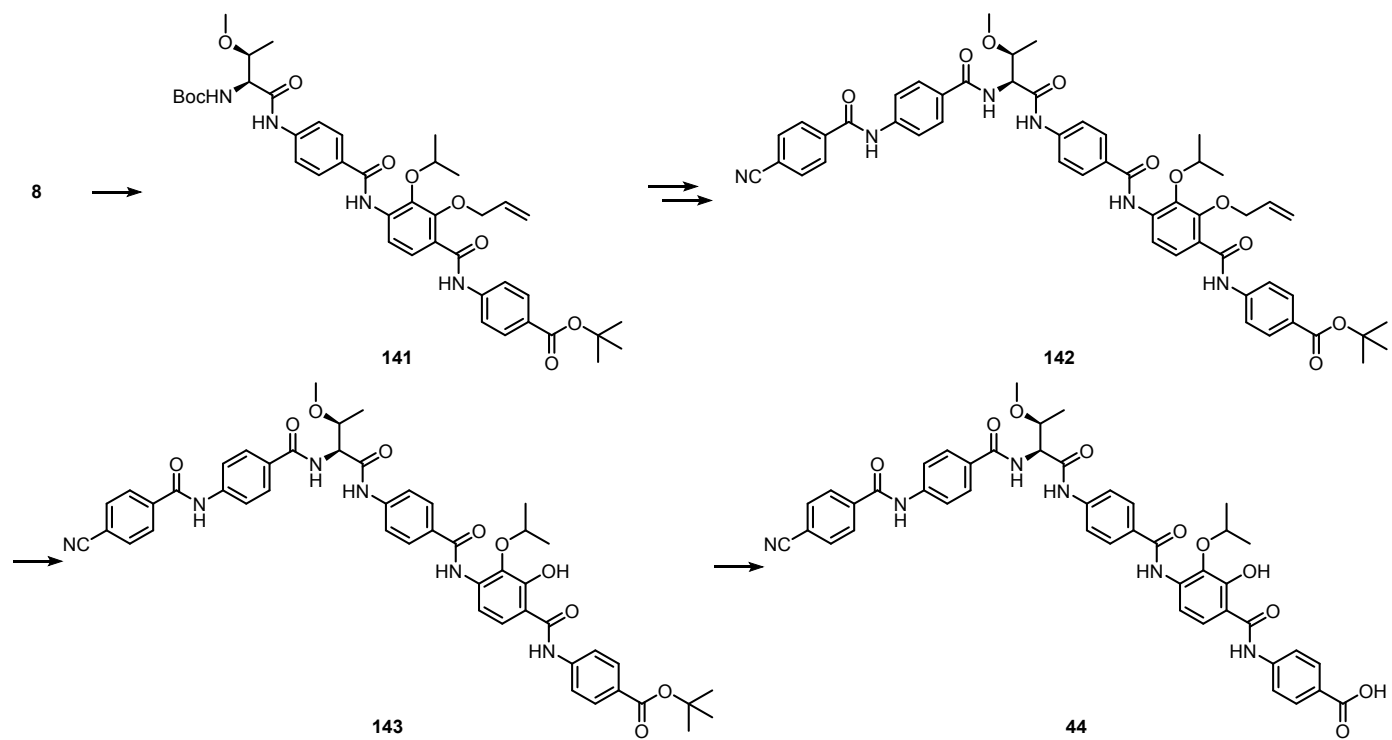

Scheme S38. Synthesis of compound **44**.

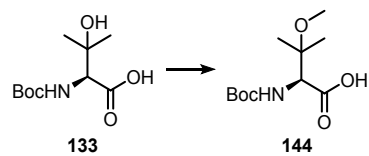

Scheme S39. Synthesis of compound **144**.

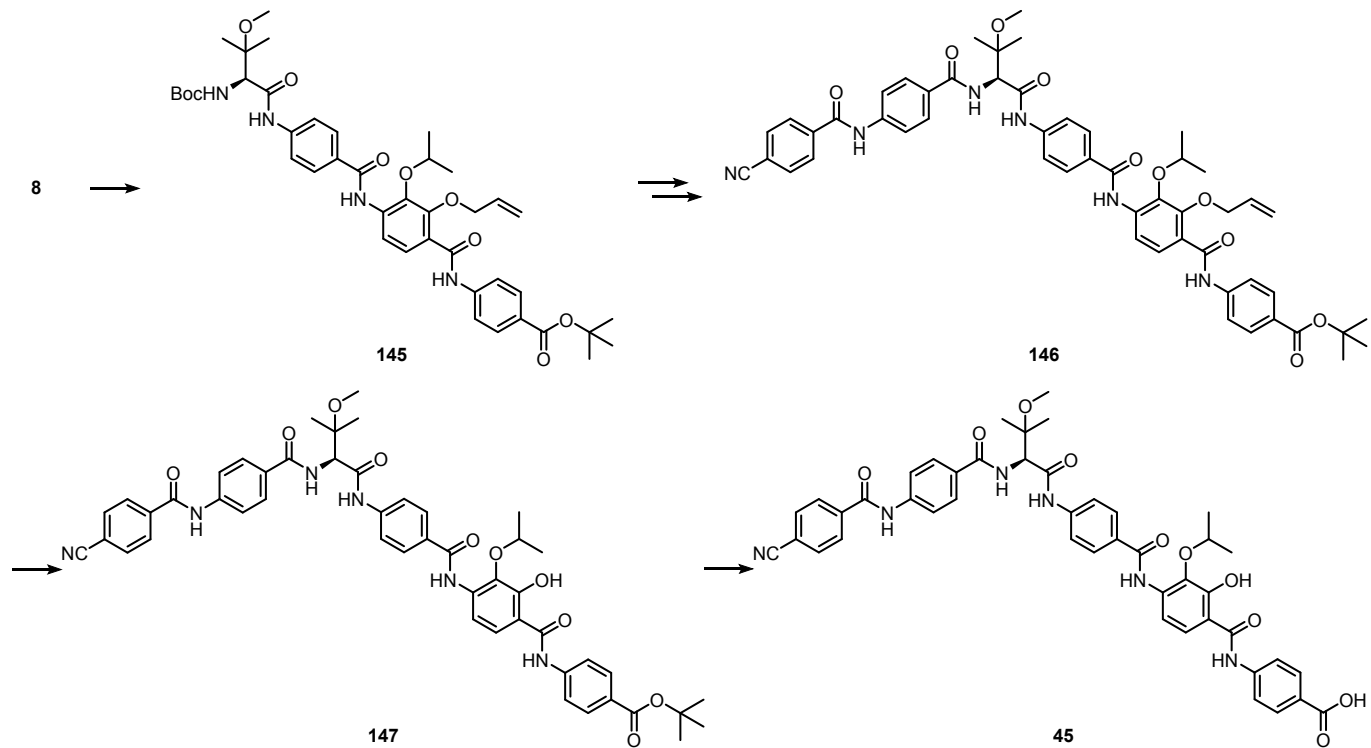

Scheme S40. Synthesis of compound **45**.

# NMR Spectra of Final Compounds

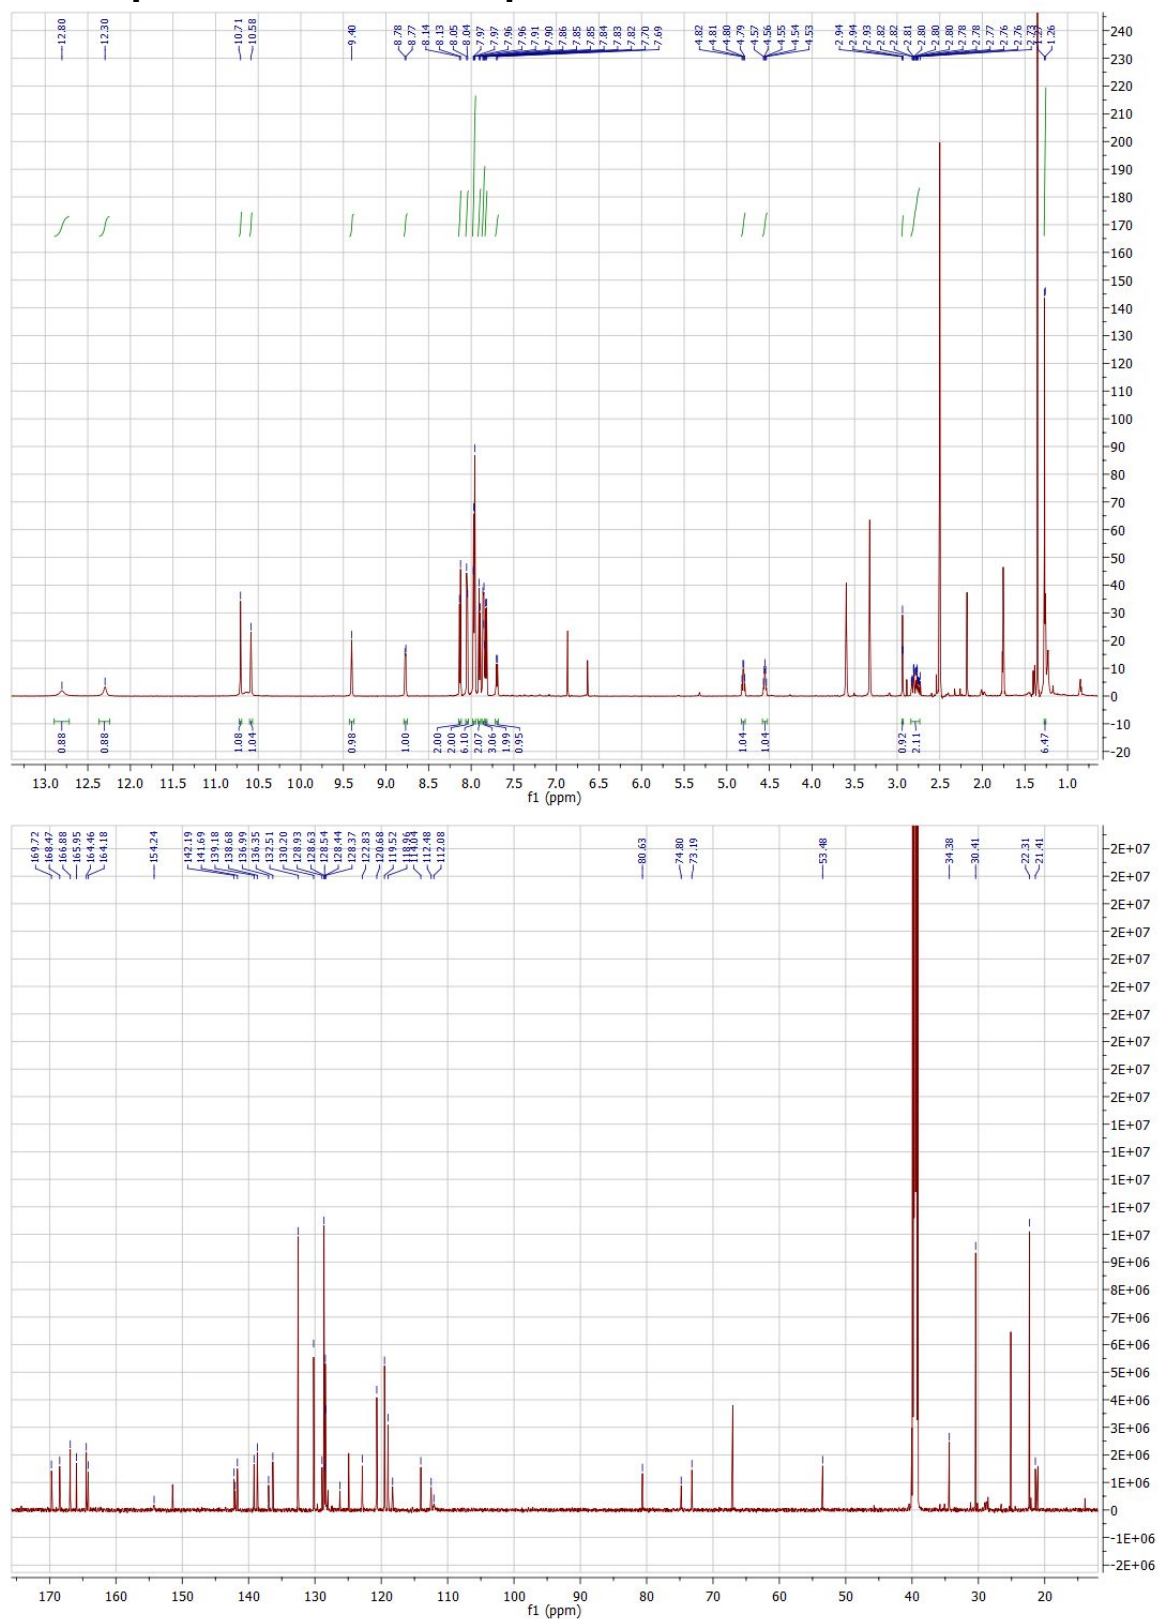

Figure S3. <sup>1</sup>H- (top) and <sup>13</sup>C-NMR (bottom) spectrum of compound 13 (CN-CC-861).

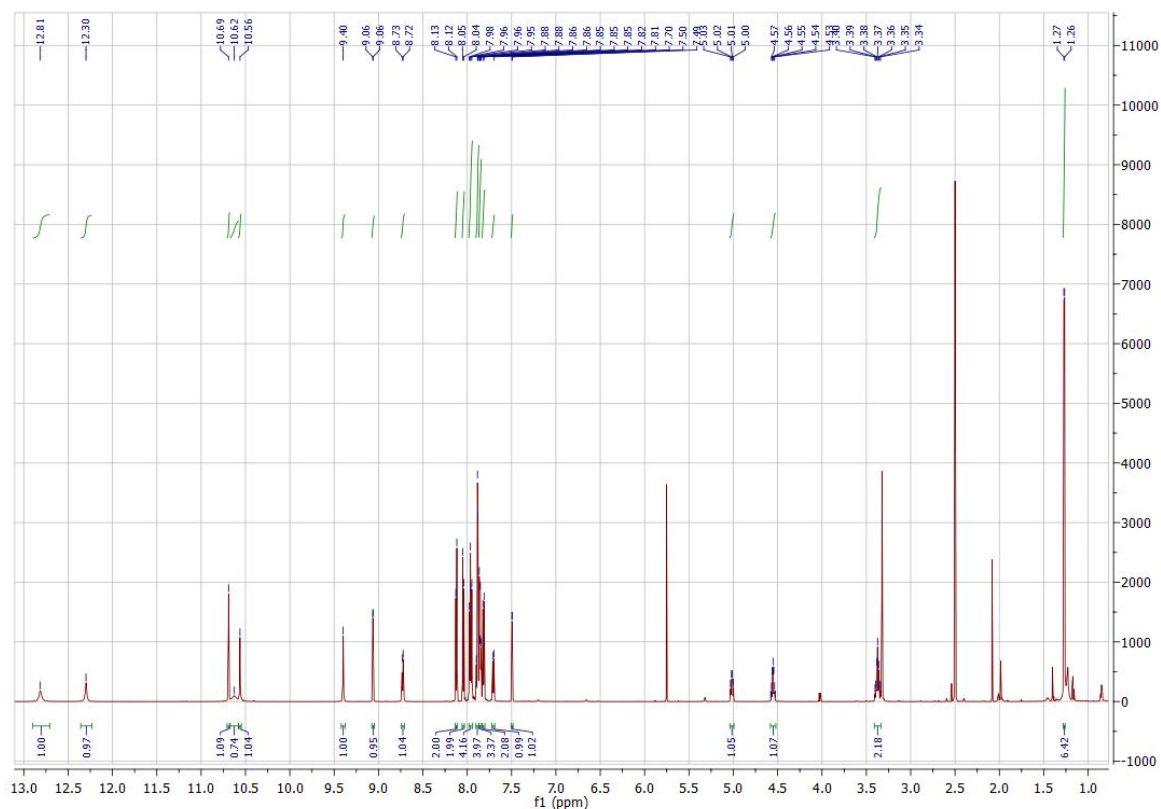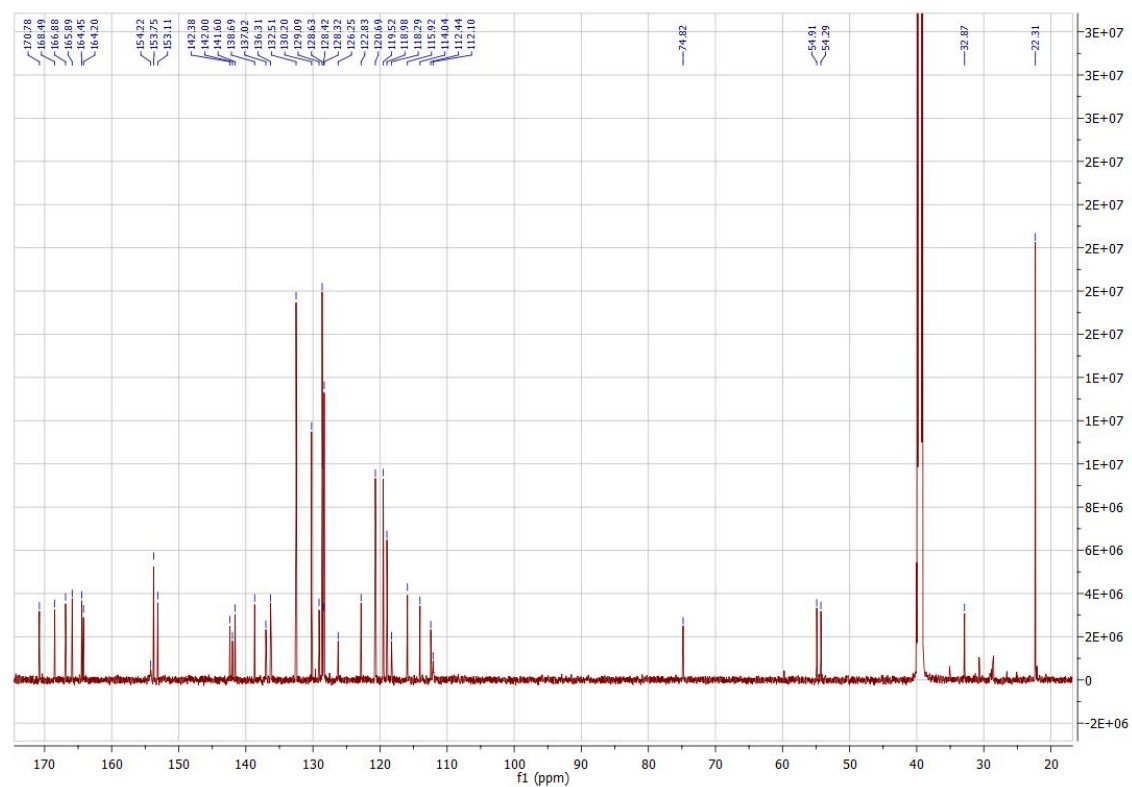

Figure S4.  $^1\text{H}$ - (top) and  $^{13}\text{C}$ -NMR (bottom) spectrum of compound **14**.

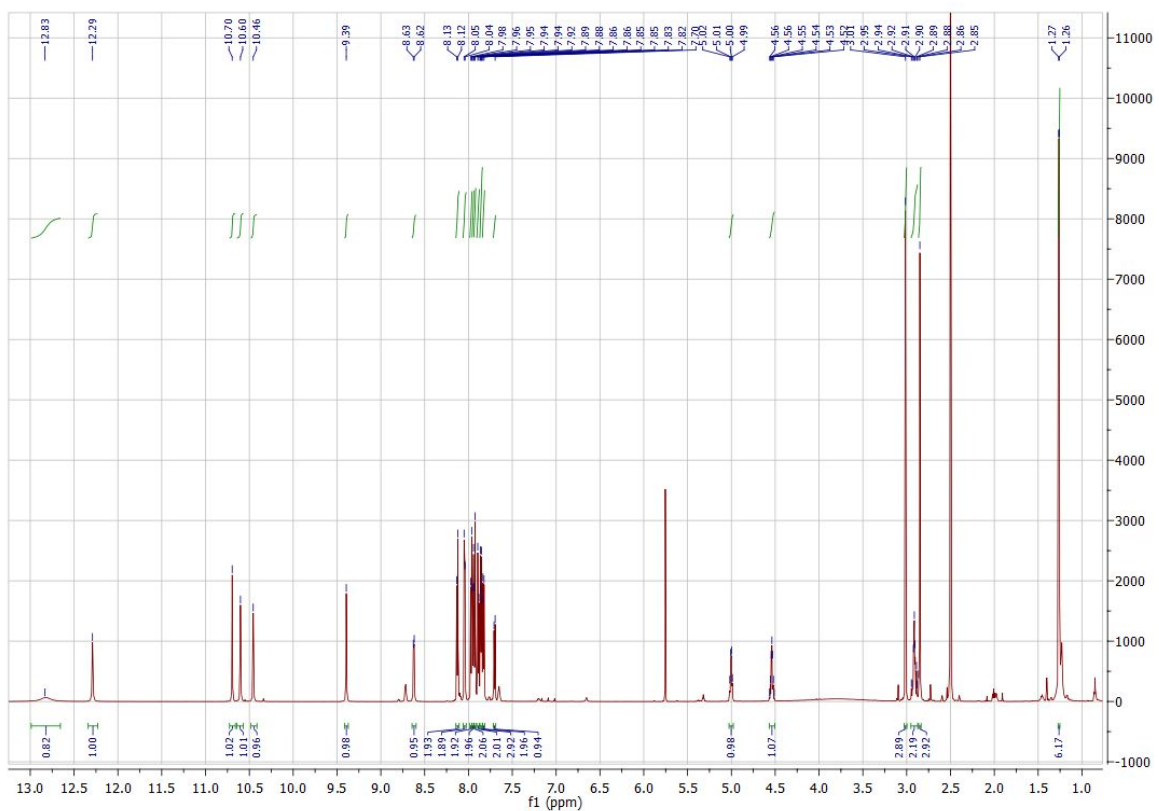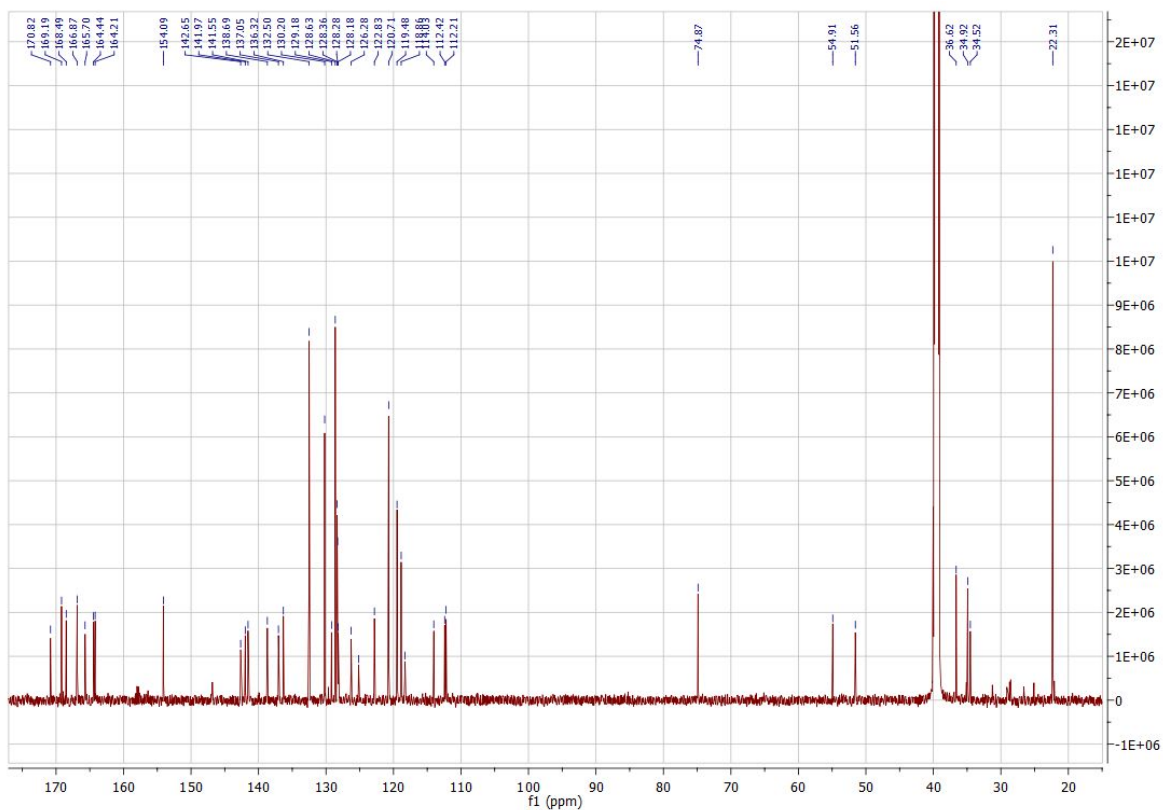

Figure S5.  $^1\text{H}$ - (top) and  $^{13}\text{C}$ -NMR (bottom) spectrum of compound **15**.

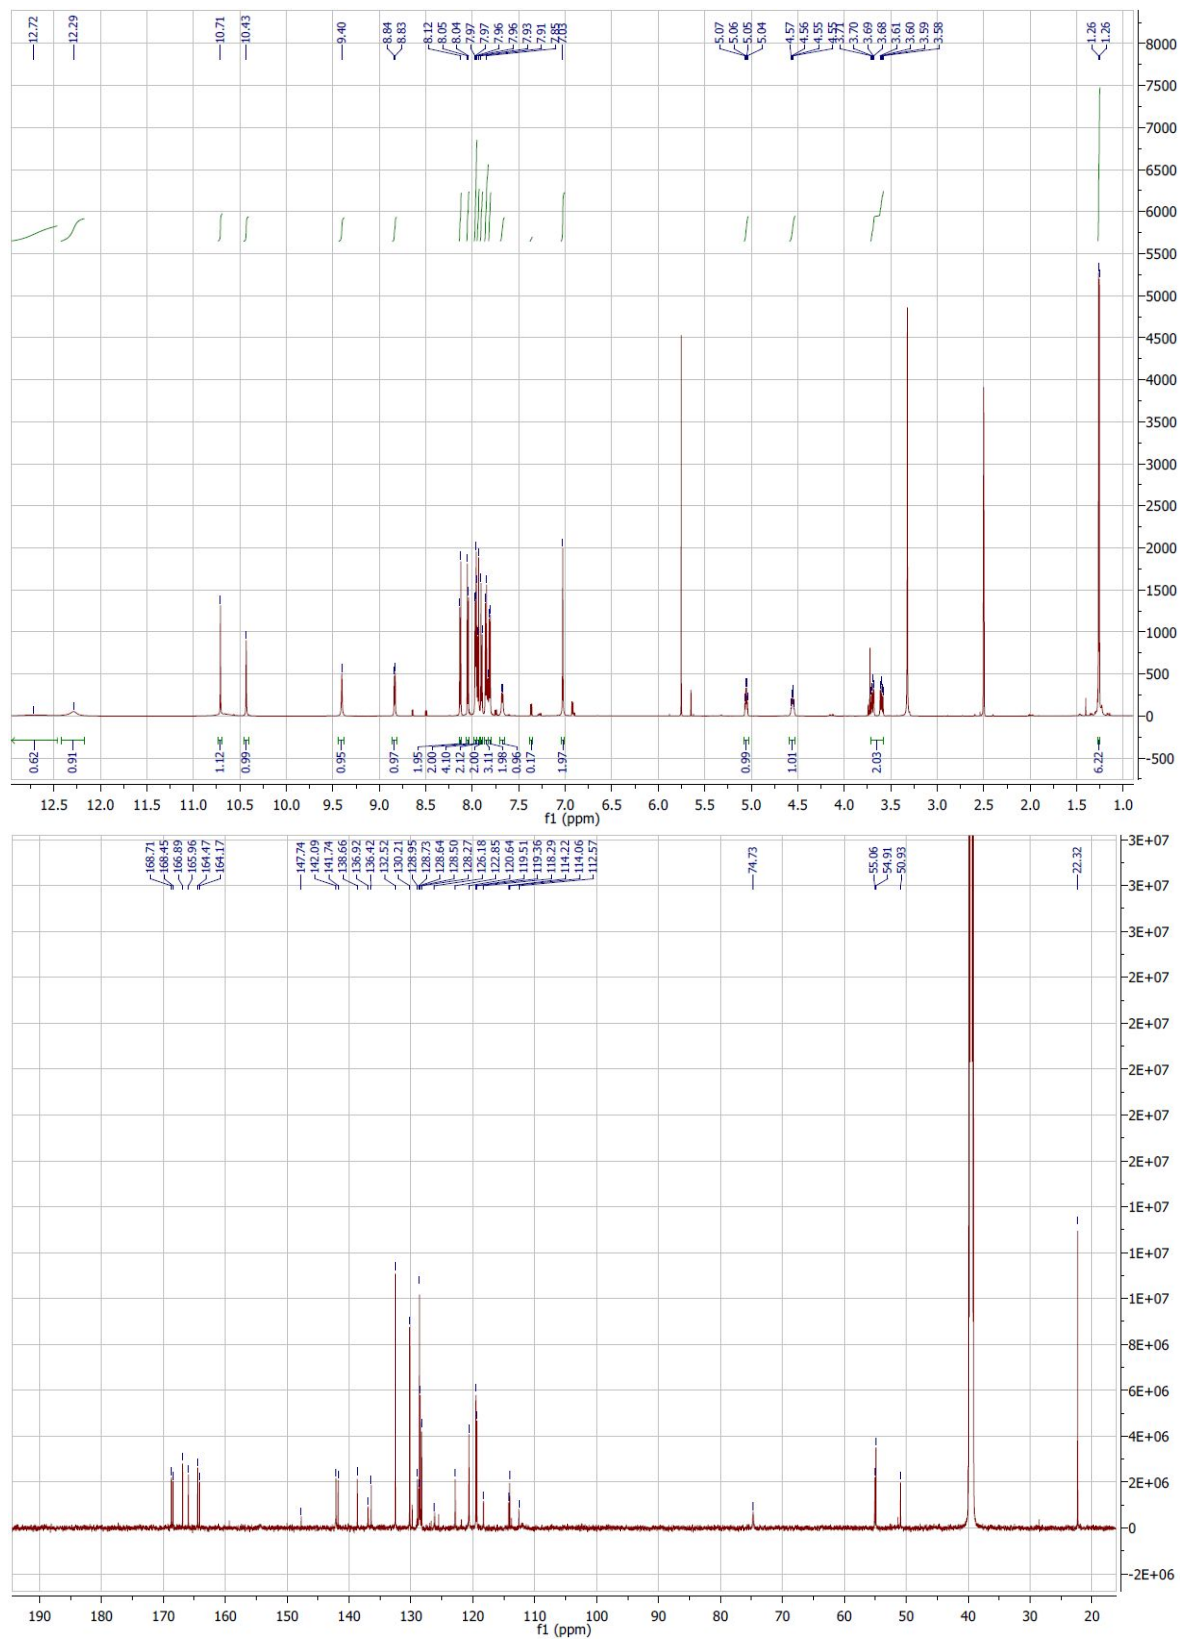

Figure S6.  $^1\text{H}$ - (top) and  $^{13}\text{C}$ -NMR (bottom) spectrum of compound 16.

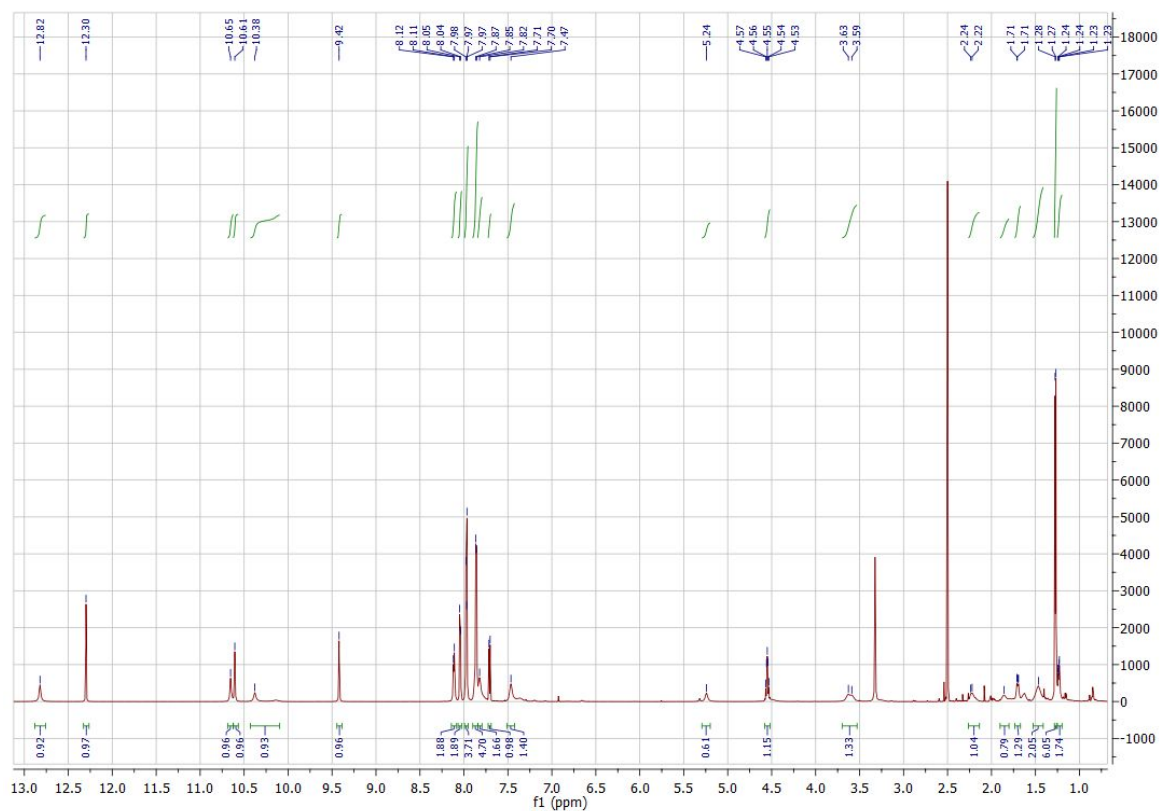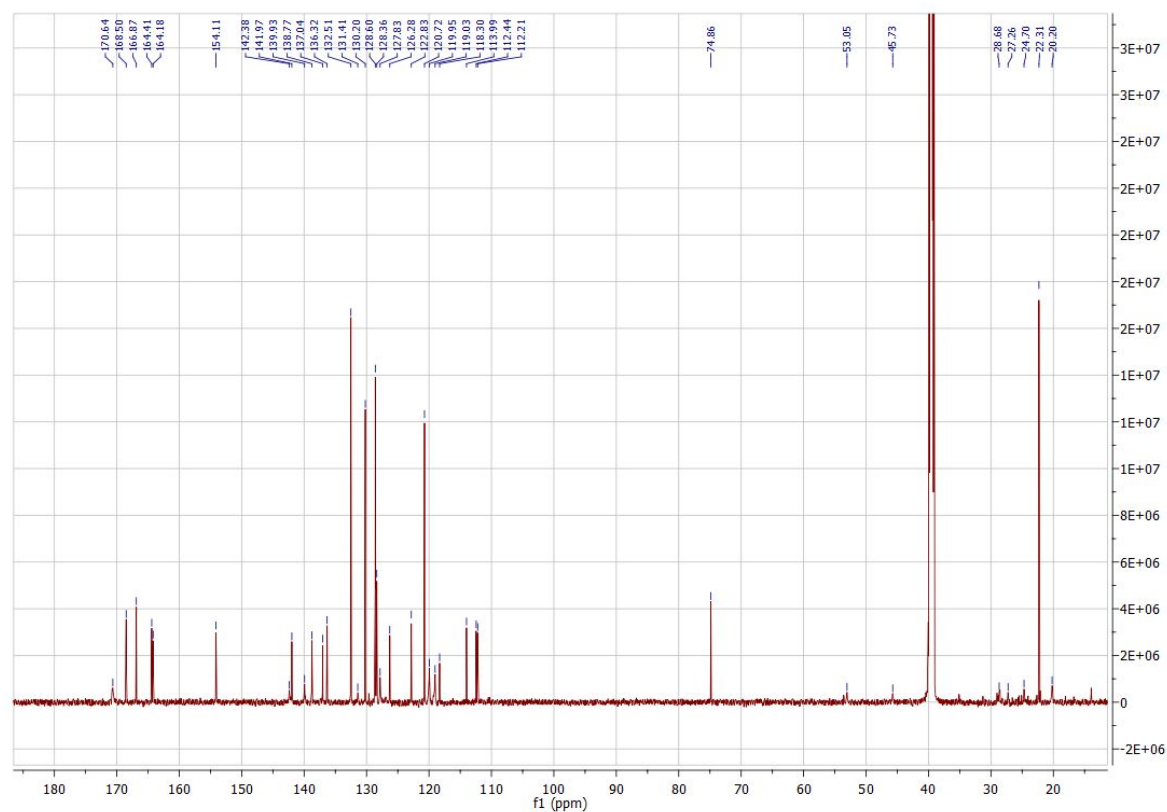

Figure S7. <sup>1</sup>H- (top) and <sup>13</sup>C-NMR (bottom) spectrum of compound **17**.



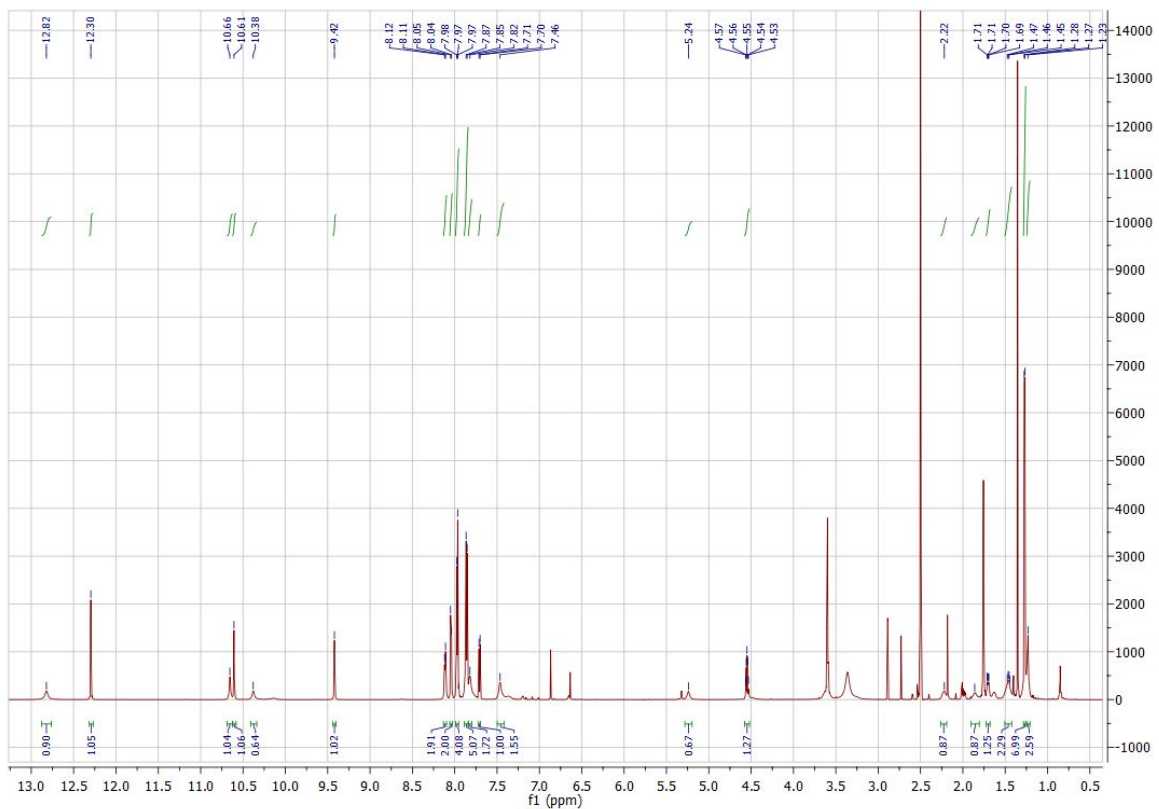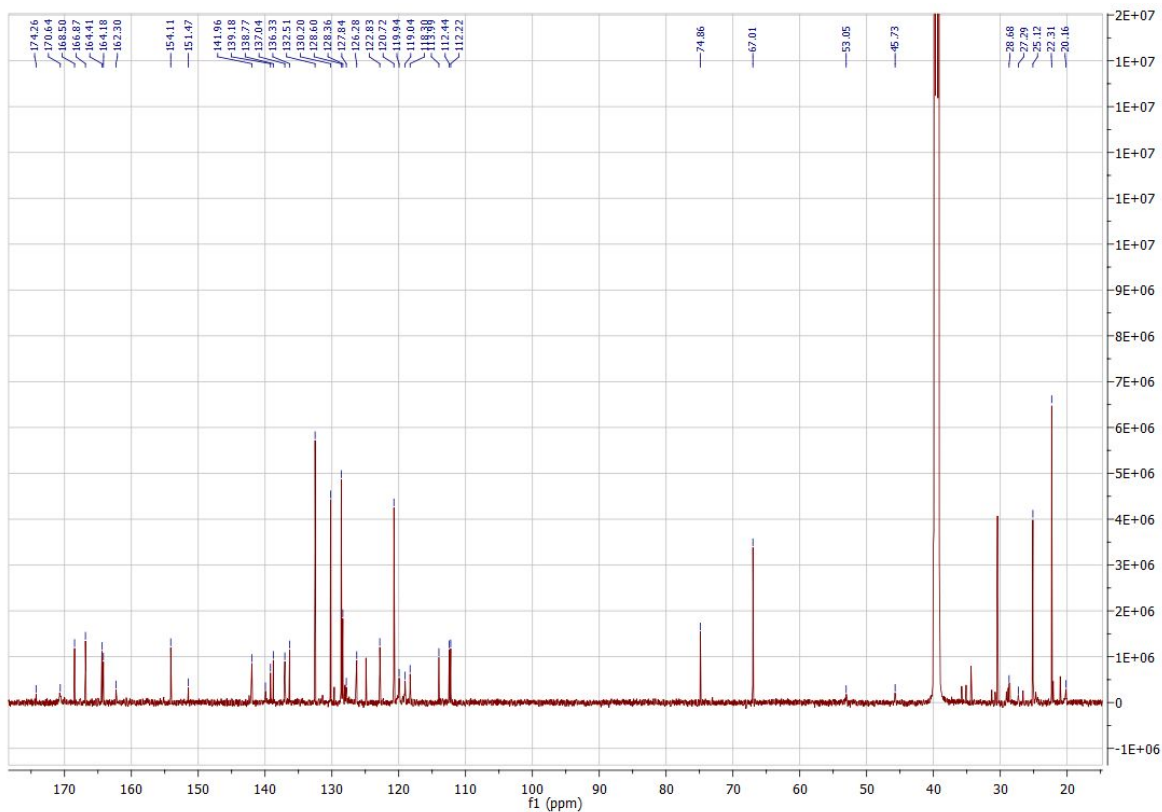

Figure S8.  $^1\text{H}$ - (top) and  $^{13}\text{C}$ -NMR (bottom) spectrum of compound **18**.

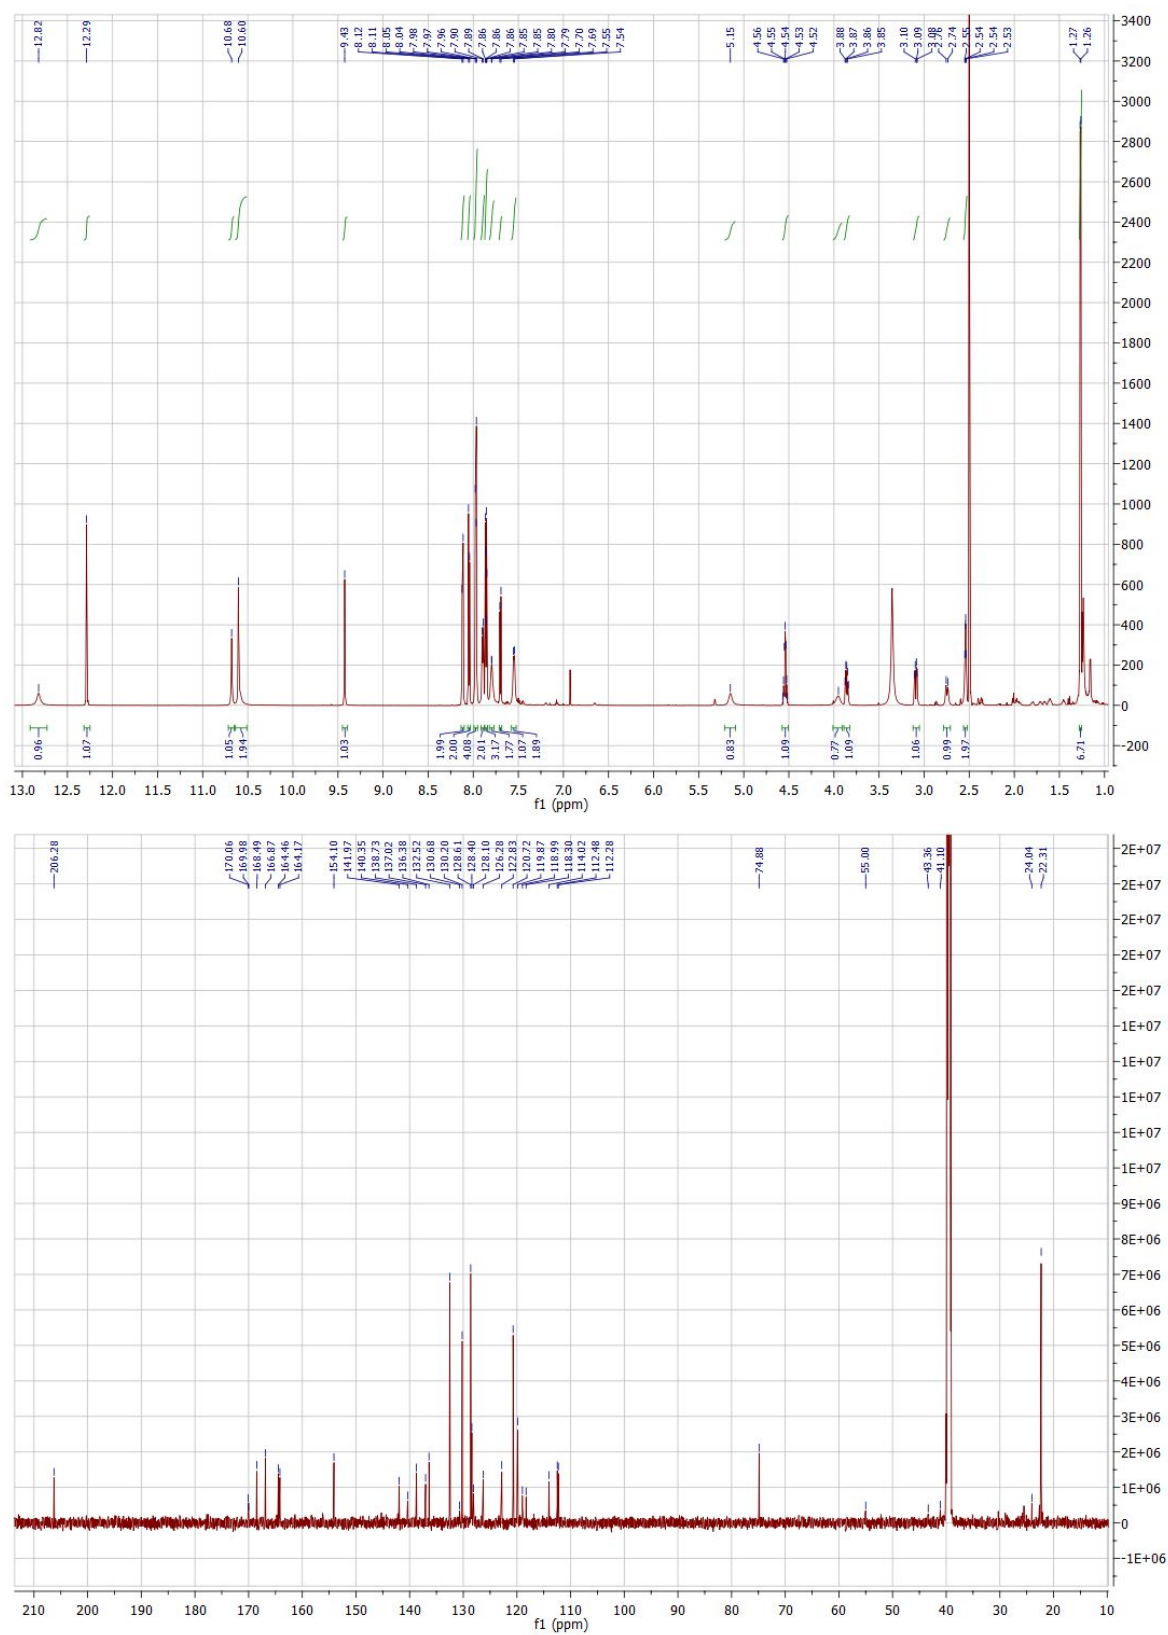

Figure S9.  $^1\text{H}$ - (top) and  $^{13}\text{C}$ -NMR (bottom) spectrum of compound **19**.

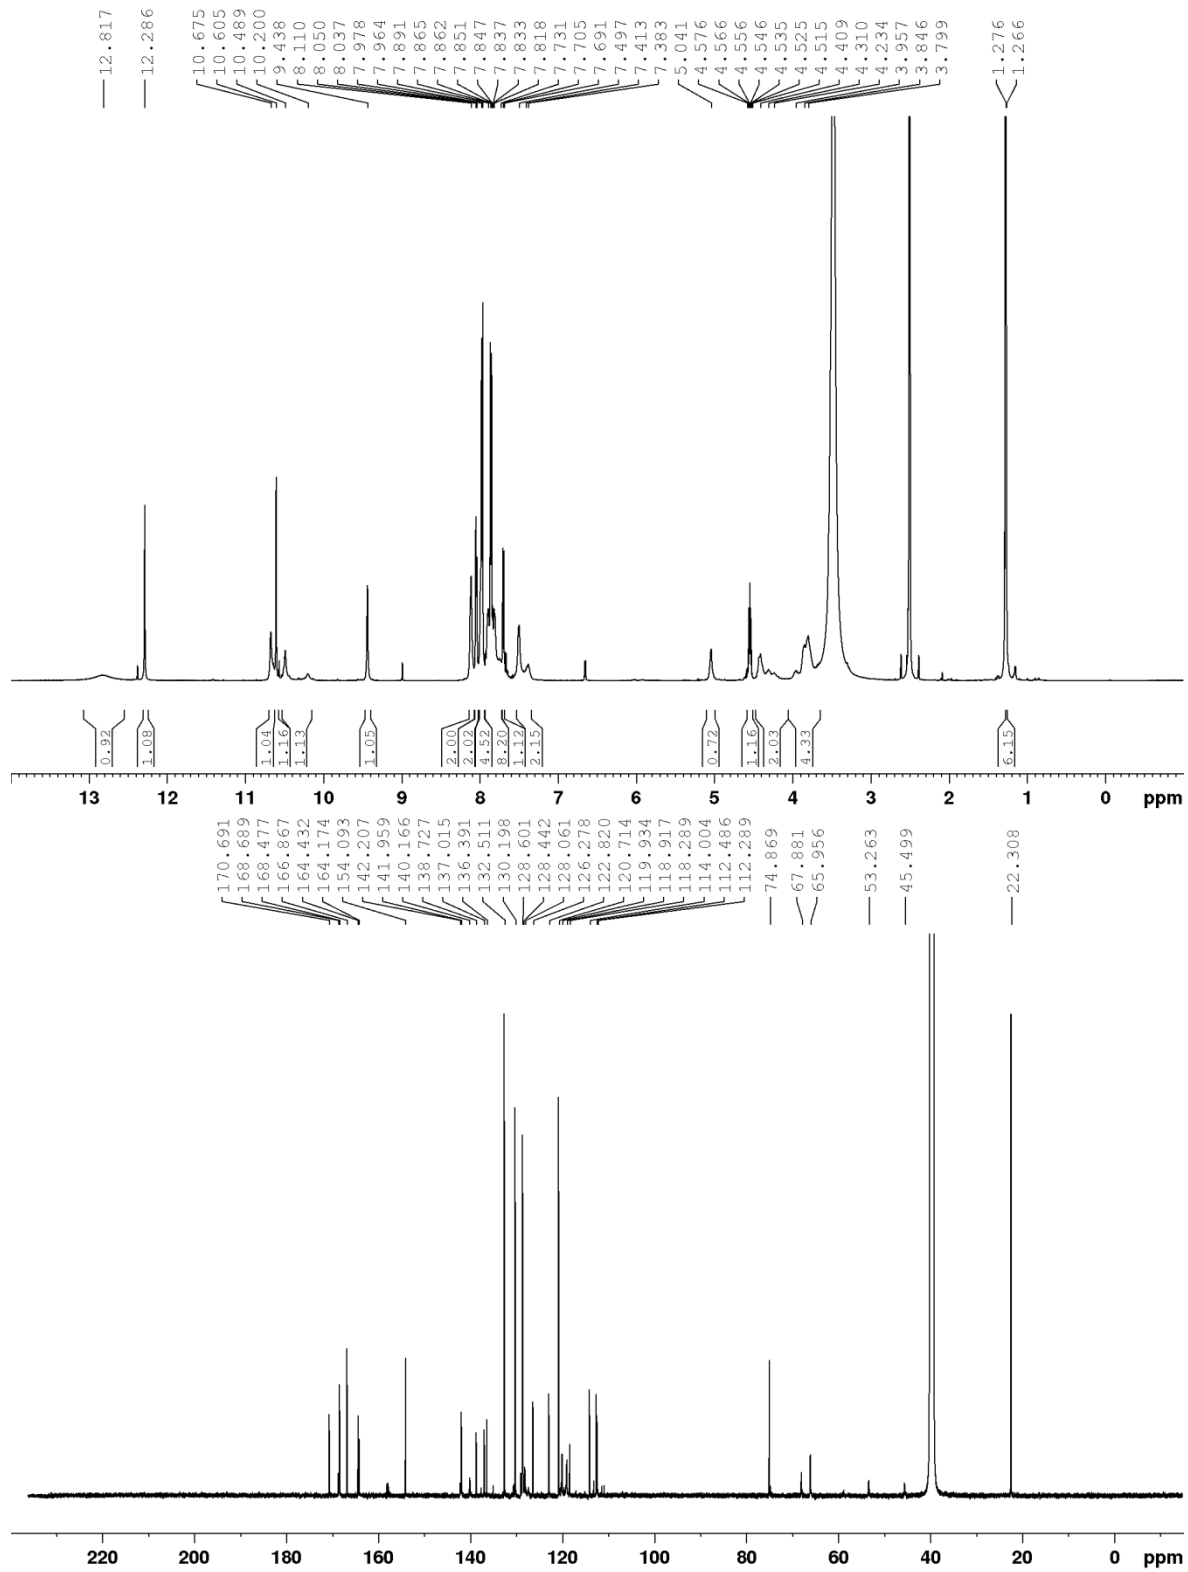

Figure S10. <sup>1</sup>H- (top) and <sup>13</sup>C-NMR (bottom) spectrum of compound **20**.

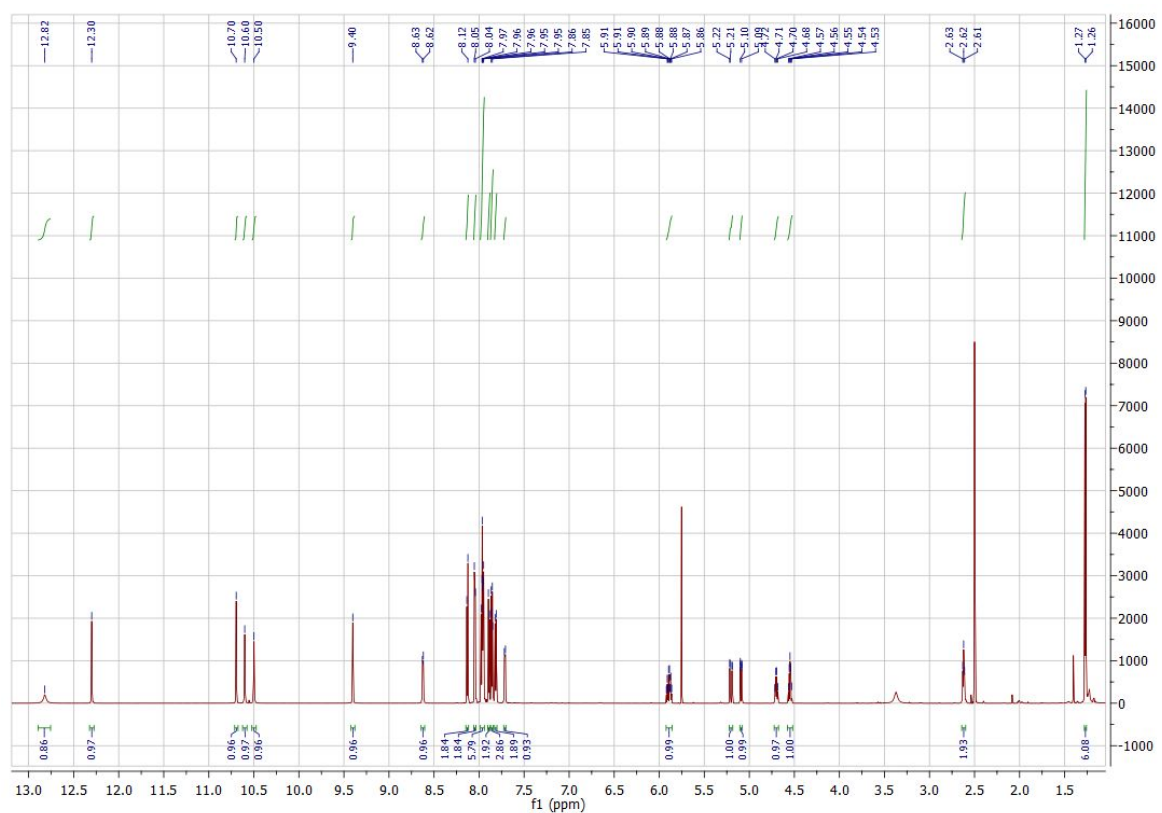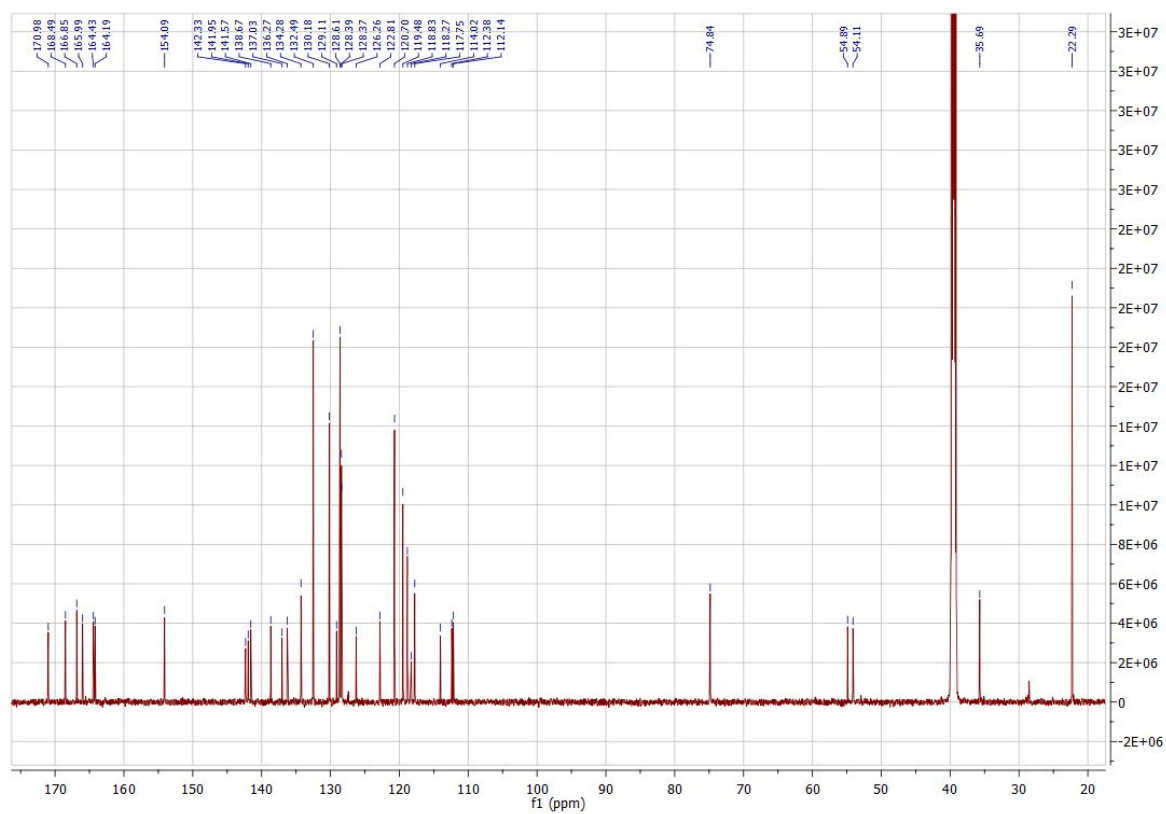

Figure S2. <sup>1</sup>H- (top) and <sup>13</sup>C-NMR (bottom) spectrum of compound **21**.

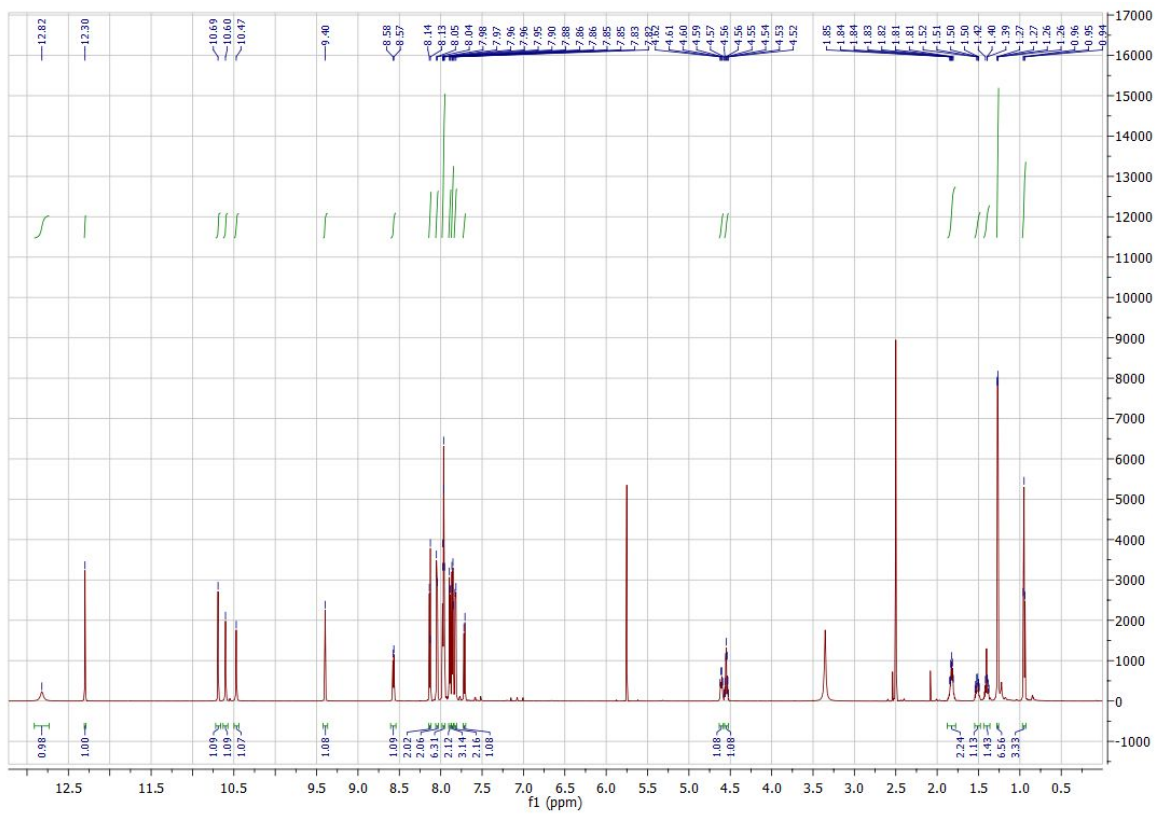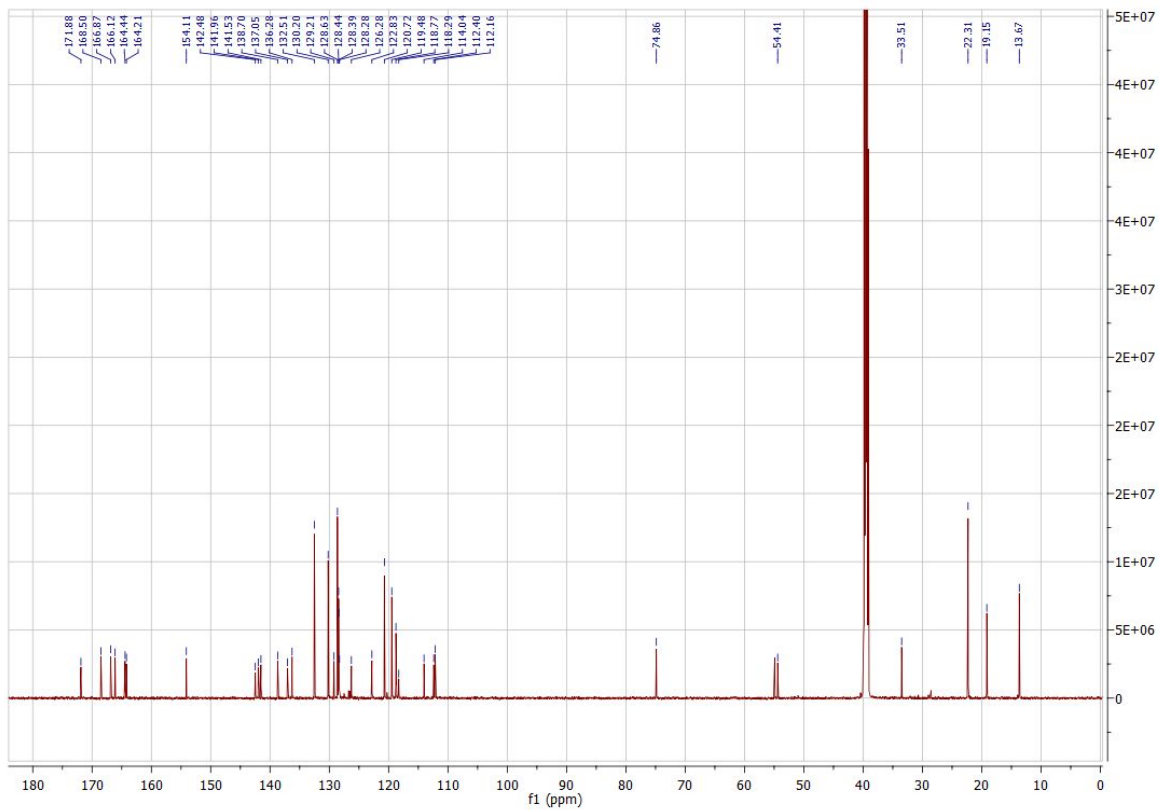

Figure S3. <sup>1</sup>H- (top) and <sup>13</sup>C-NMR (bottom) spectrum of compound **22**.

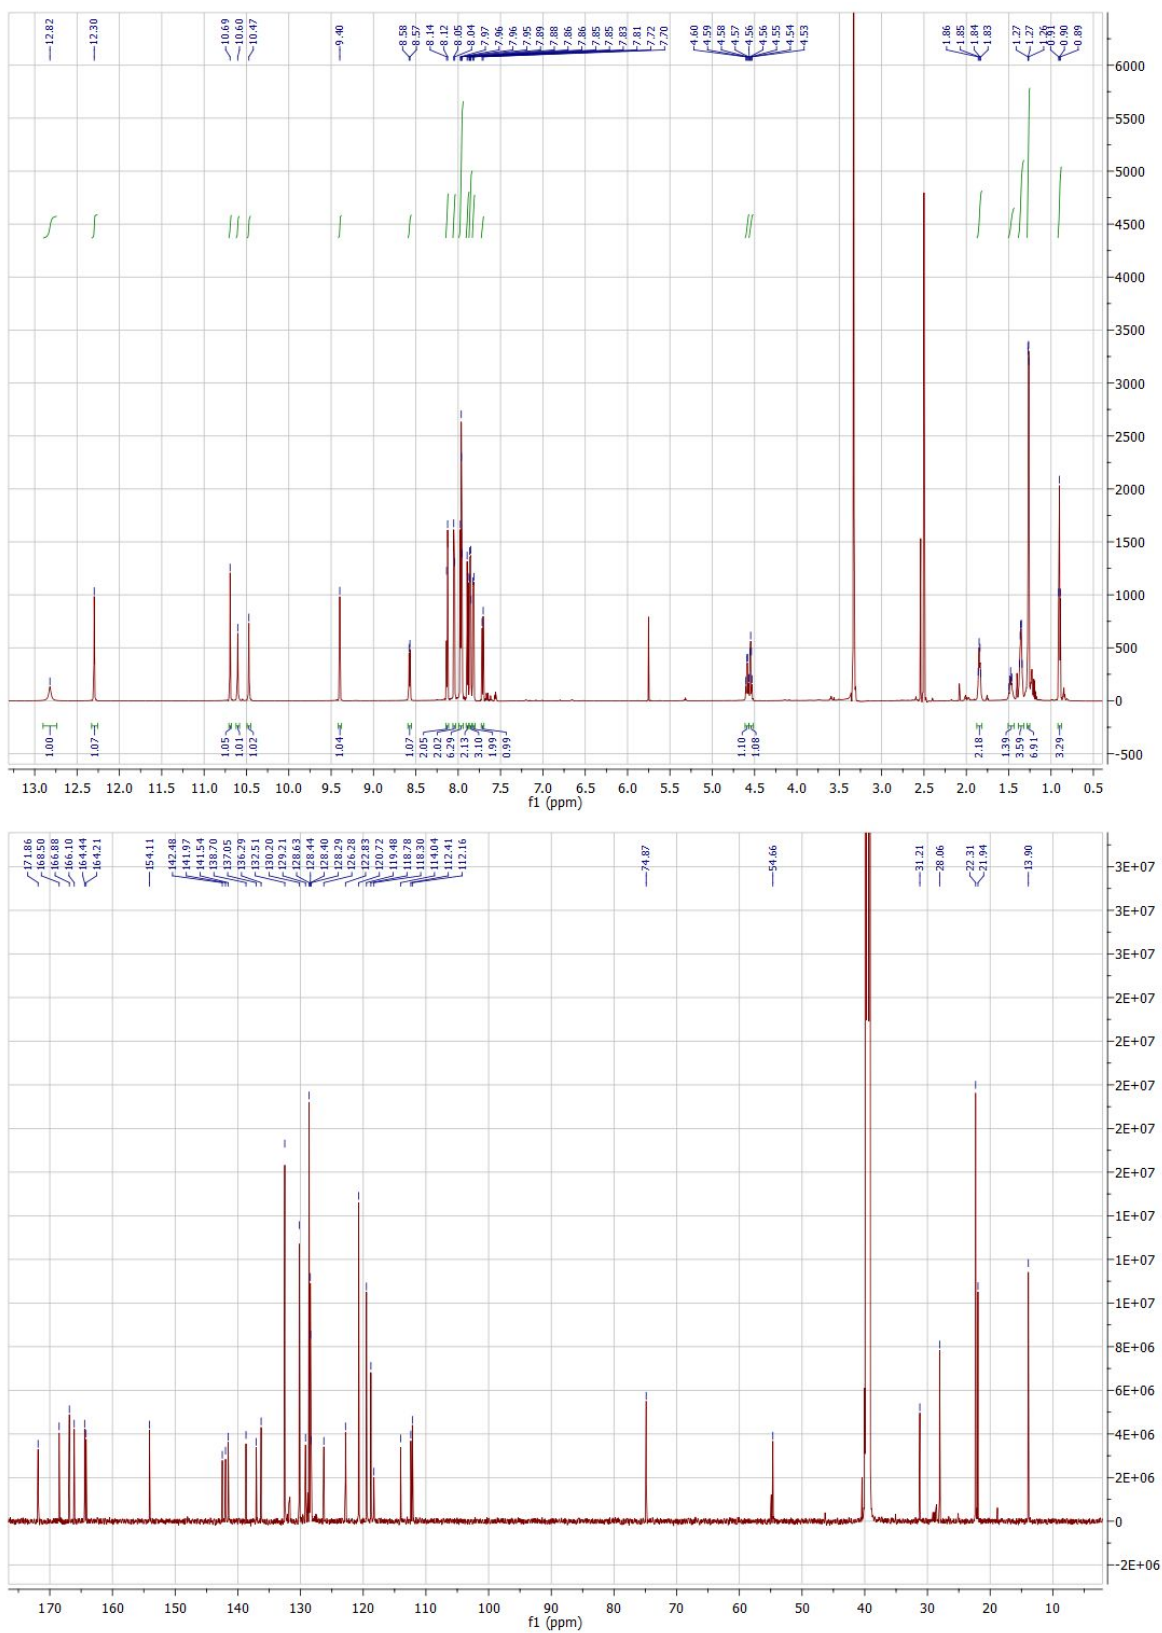

Figure S4.  $^1\text{H}$ - (top) and  $^{13}\text{C}$ -NMR (bottom) spectrum of compound **23**.

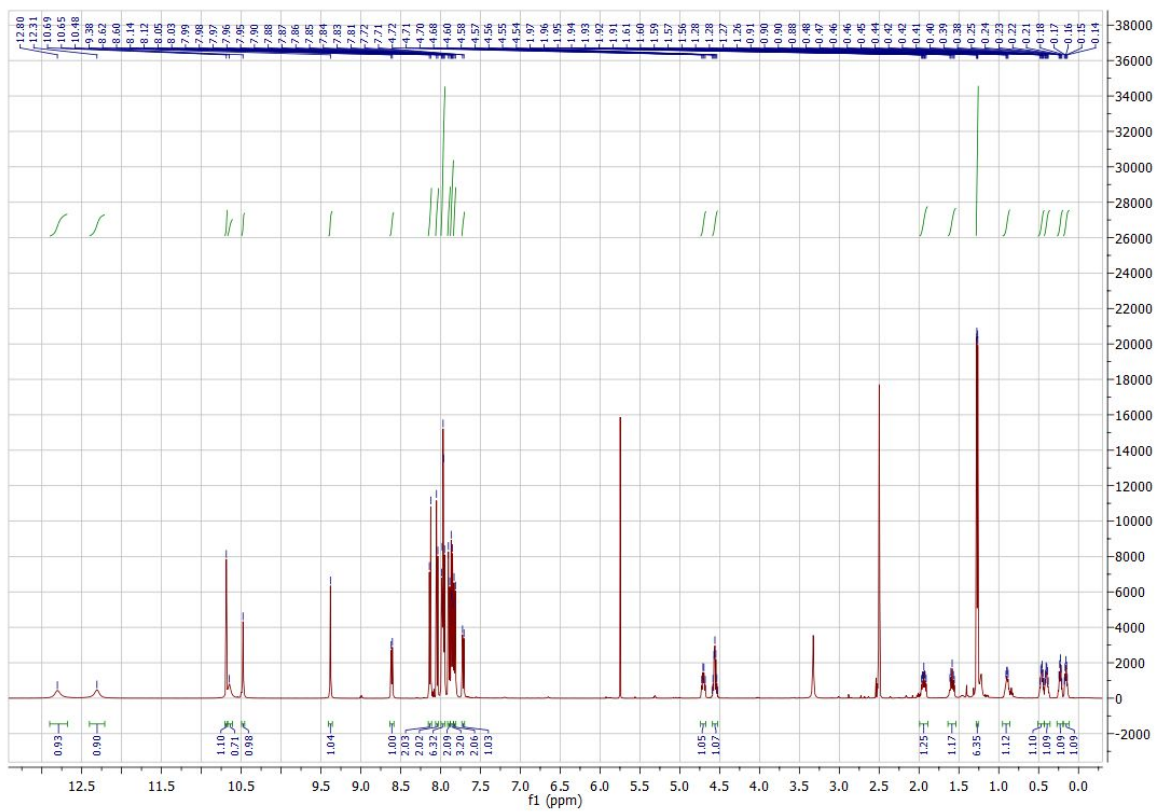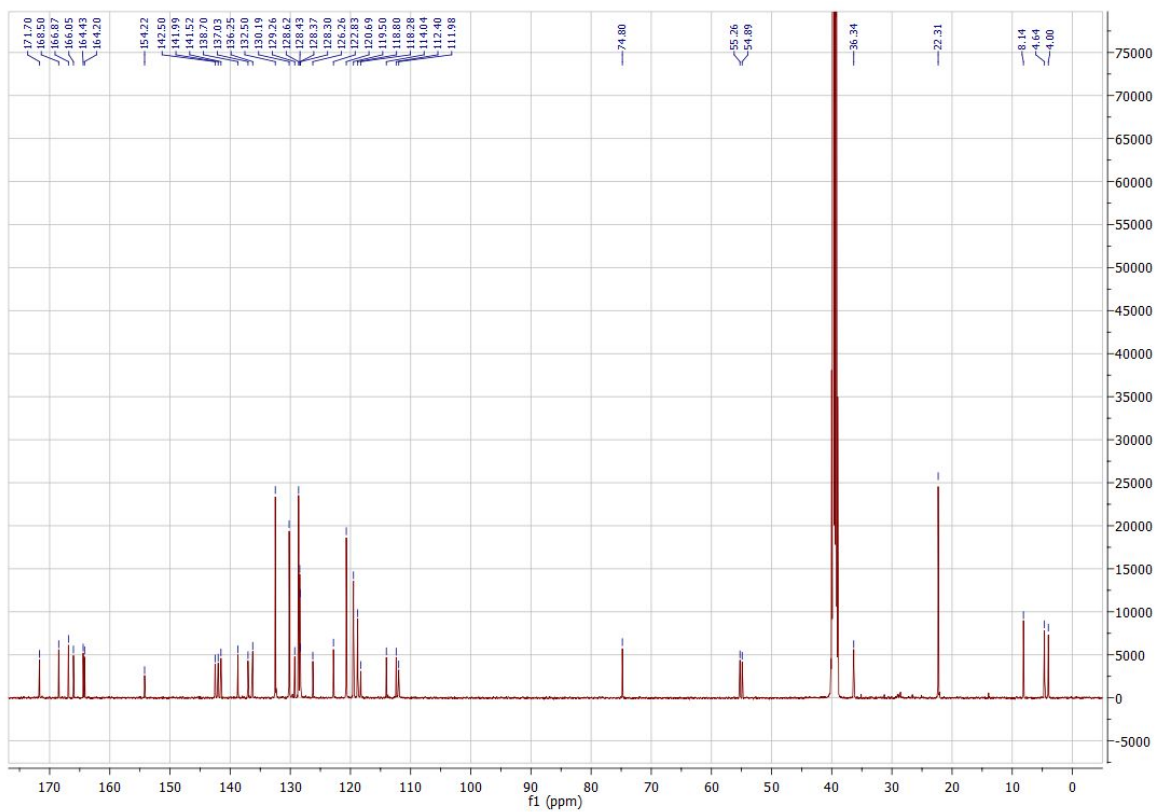

Figure S5.  $^1\text{H}$ - (top) and  $^{13}\text{C}$ -NMR (bottom) spectrum of compound **24**.

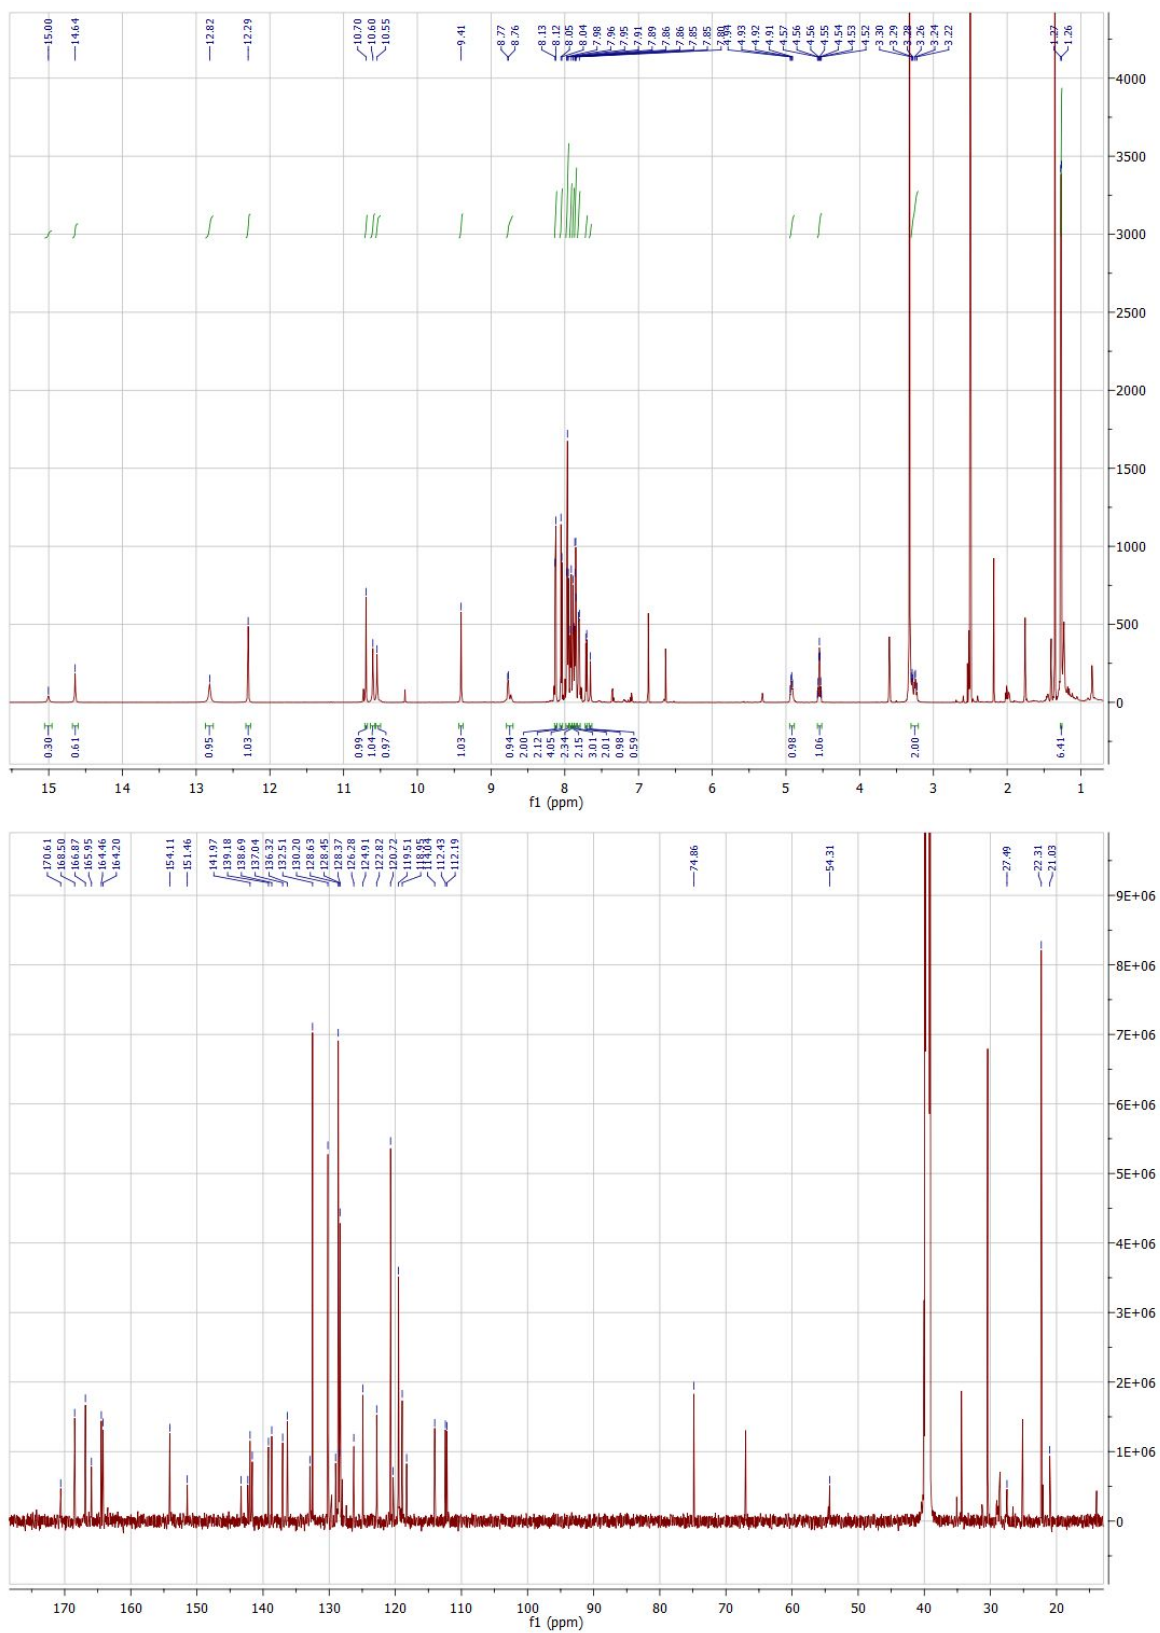

Figure S6. <sup>1</sup>H- (top) and <sup>13</sup>C-NMR (bottom) spectrum of compound **25**.



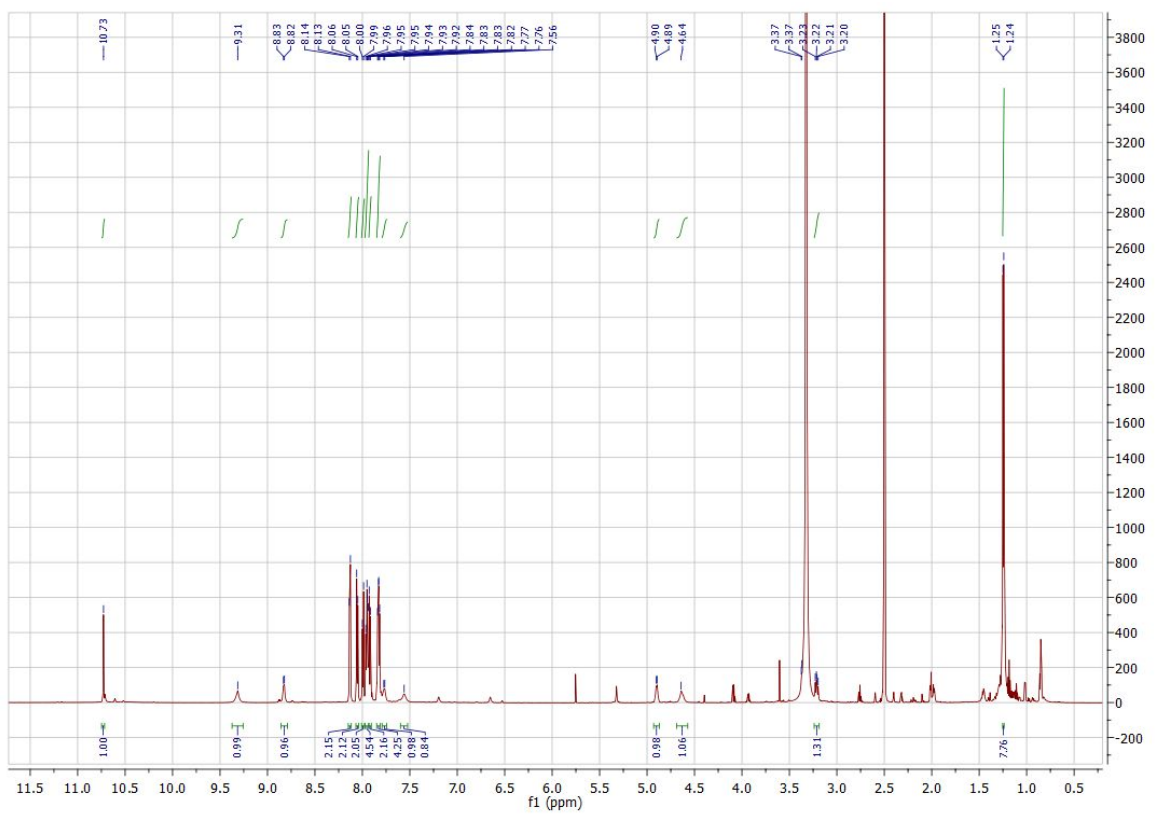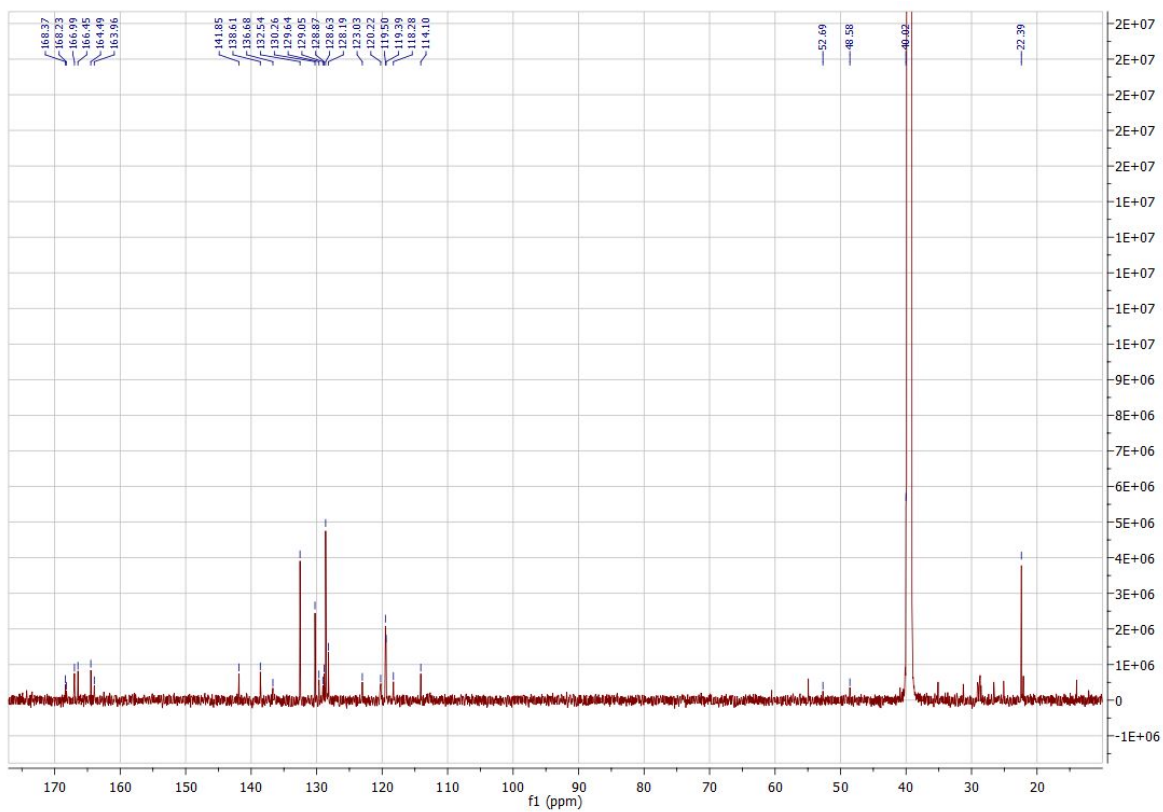

Figure S7.  $^1\text{H}$ - (top) and  $^{13}\text{C}$ -NMR (bottom) spectrum of compound **26**.

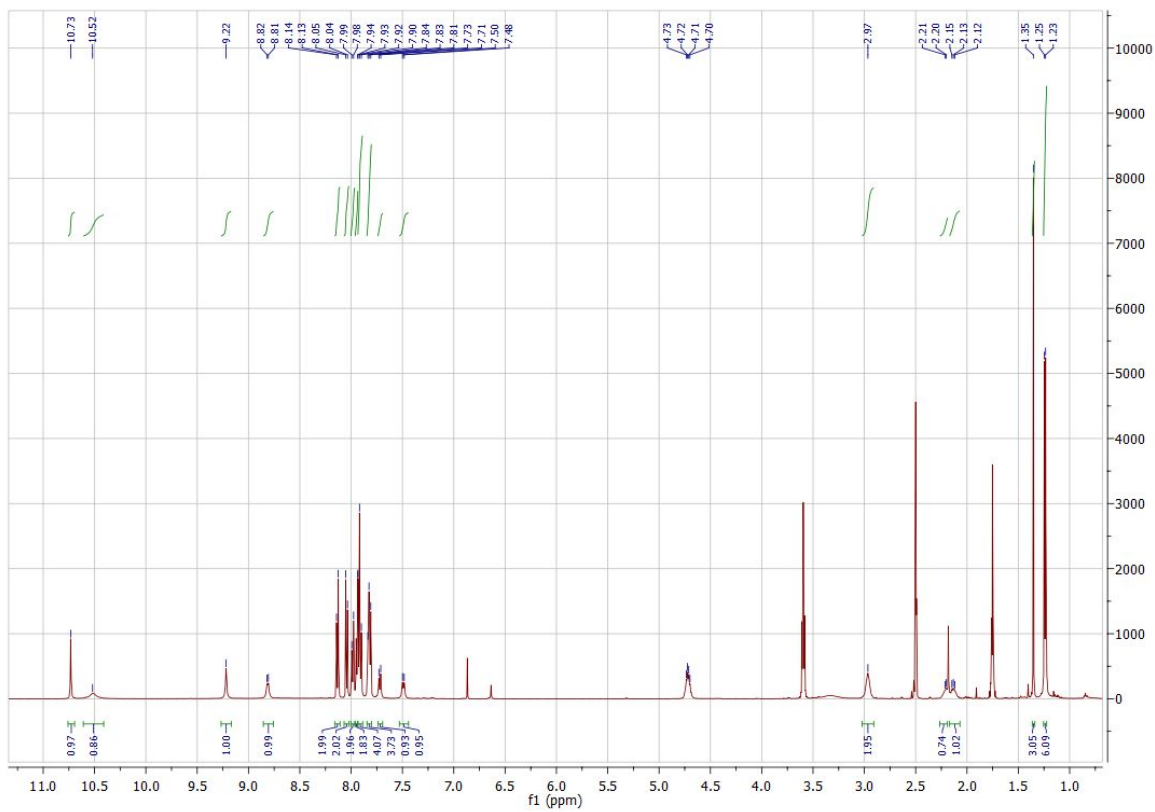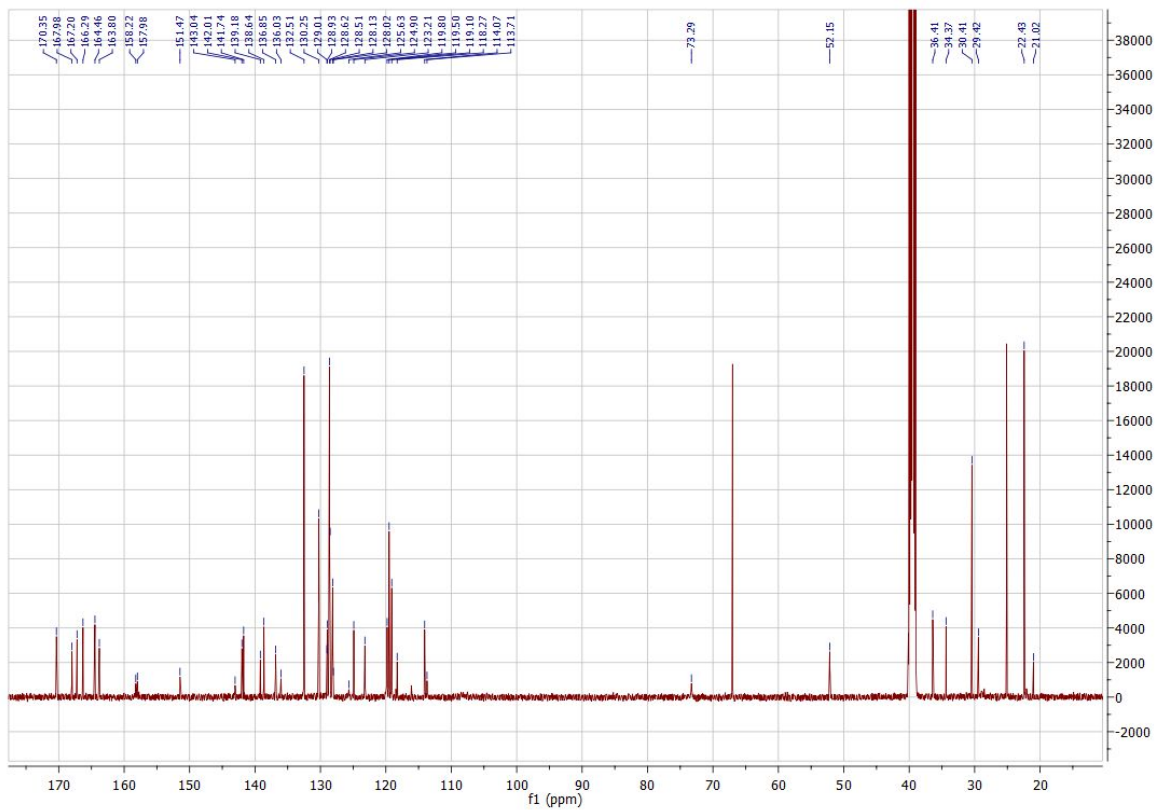

Figure S8. <sup>1</sup>H- (top) and <sup>13</sup>C-NMR (bottom) spectrum of compound **27**.

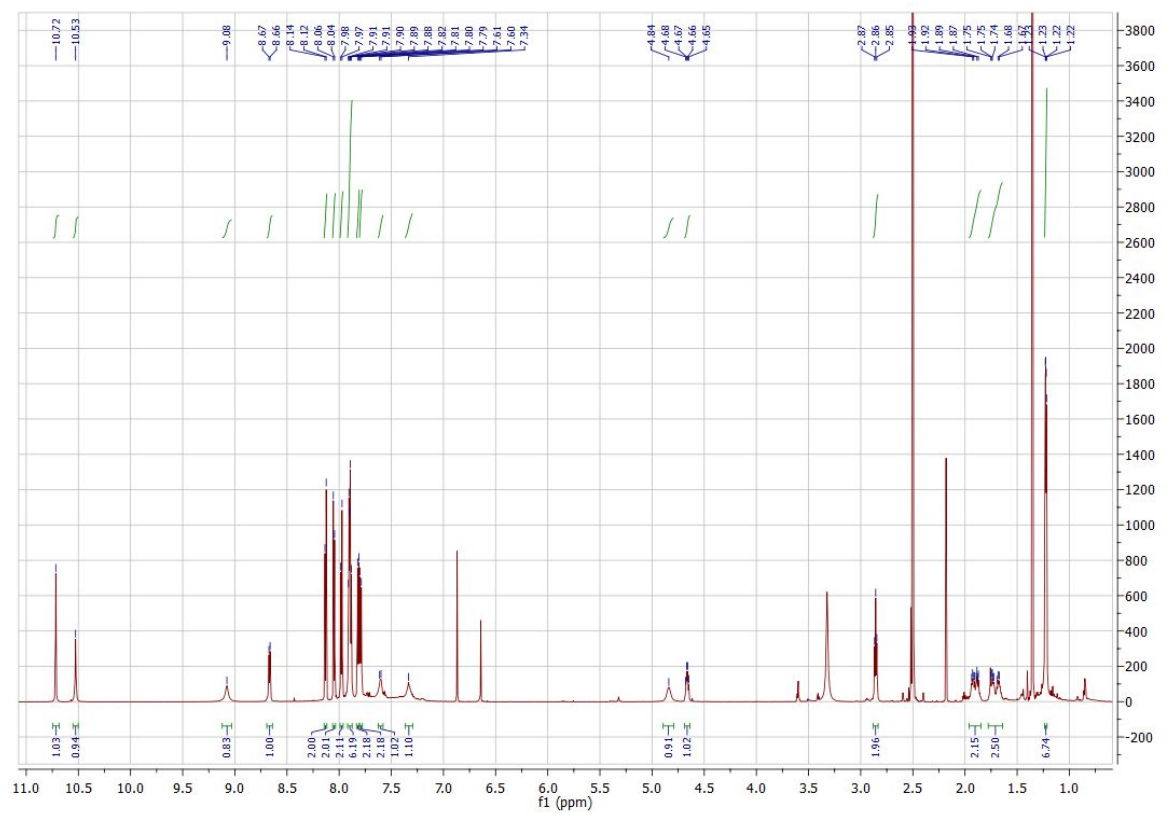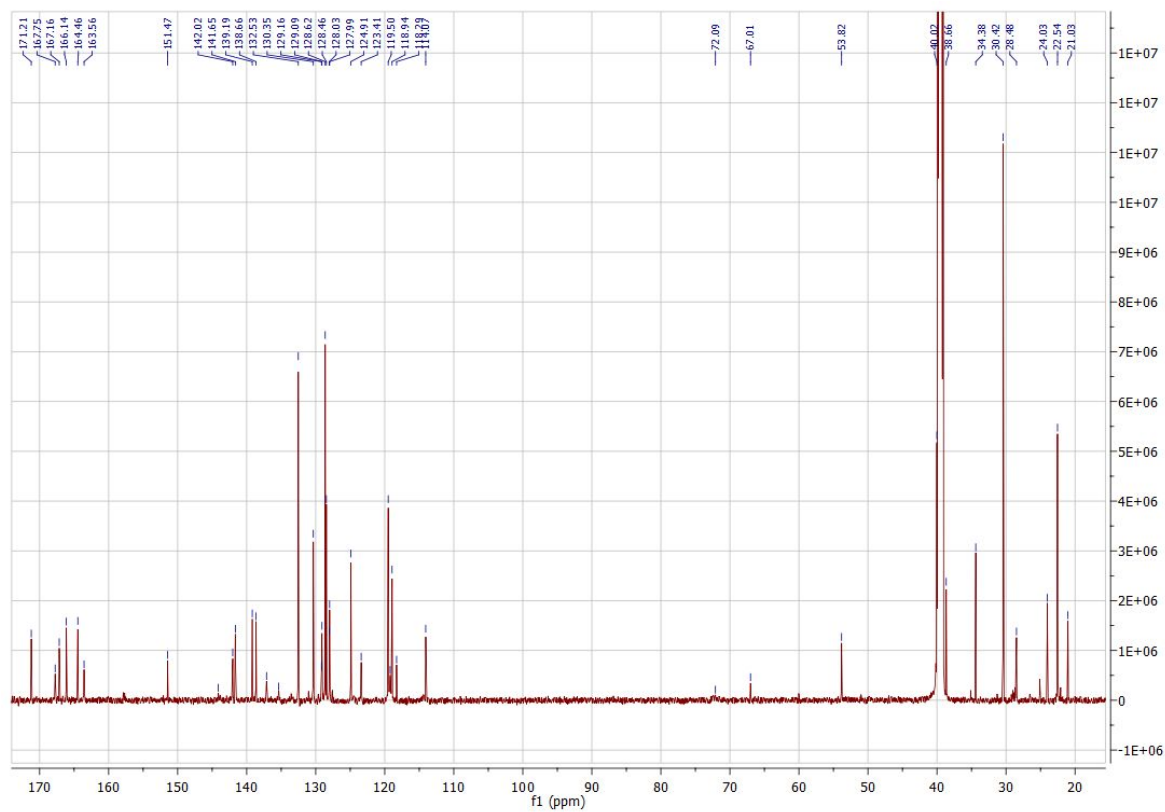

Figure S9. <sup>1</sup>H- (top) and <sup>13</sup>C-NMR (bottom) spectrum of compound **28**.

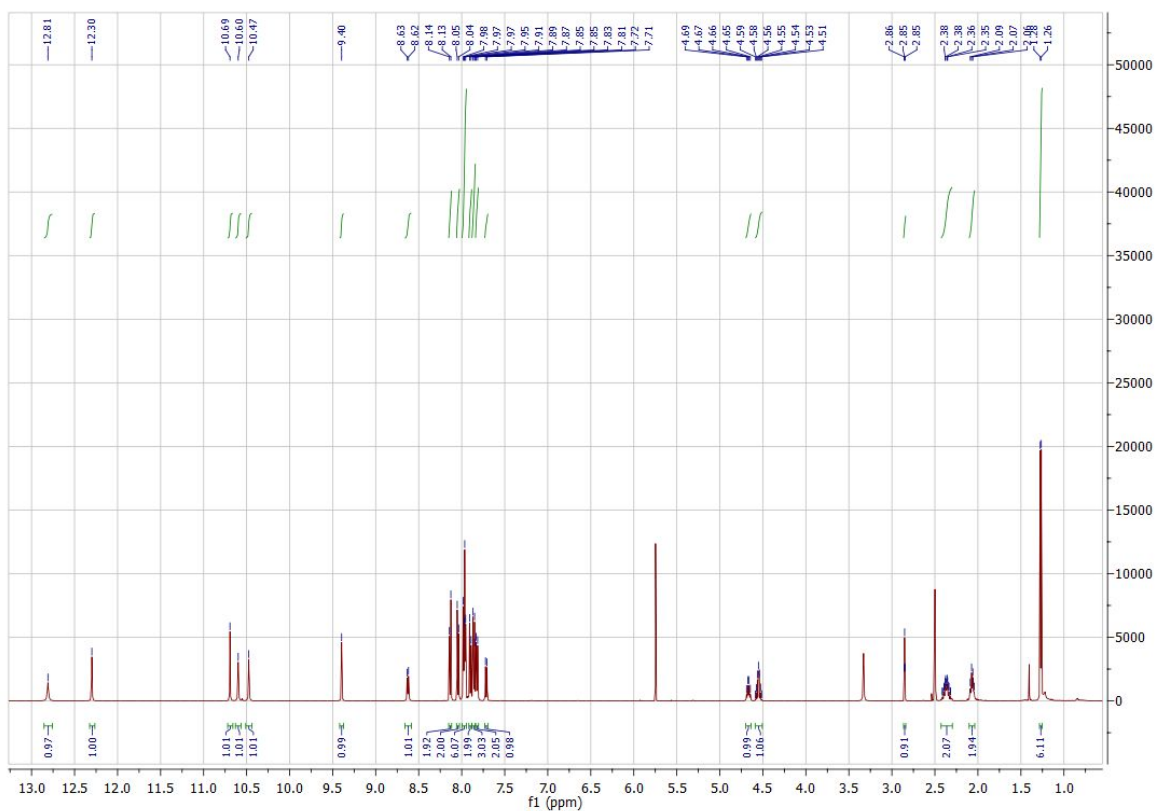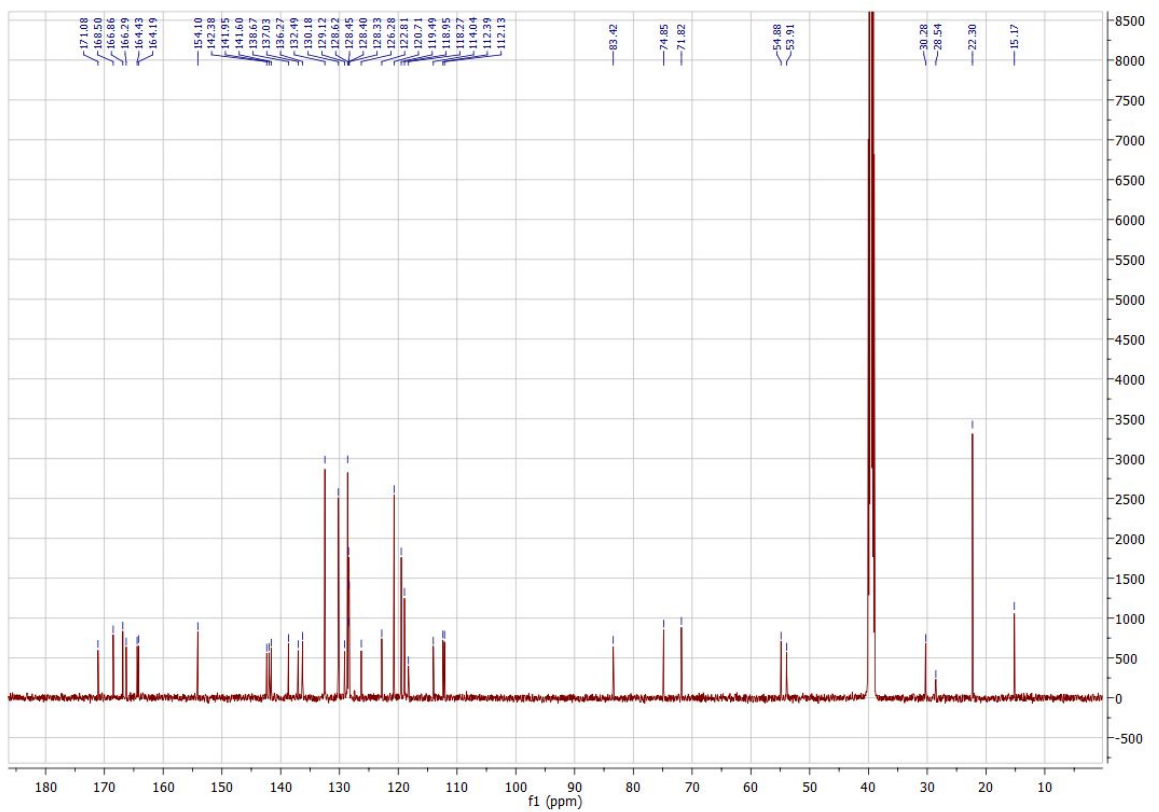

Figure S10. <sup>1</sup>H- (top) and <sup>13</sup>C-NMR (bottom) spectrum of compound **29**.

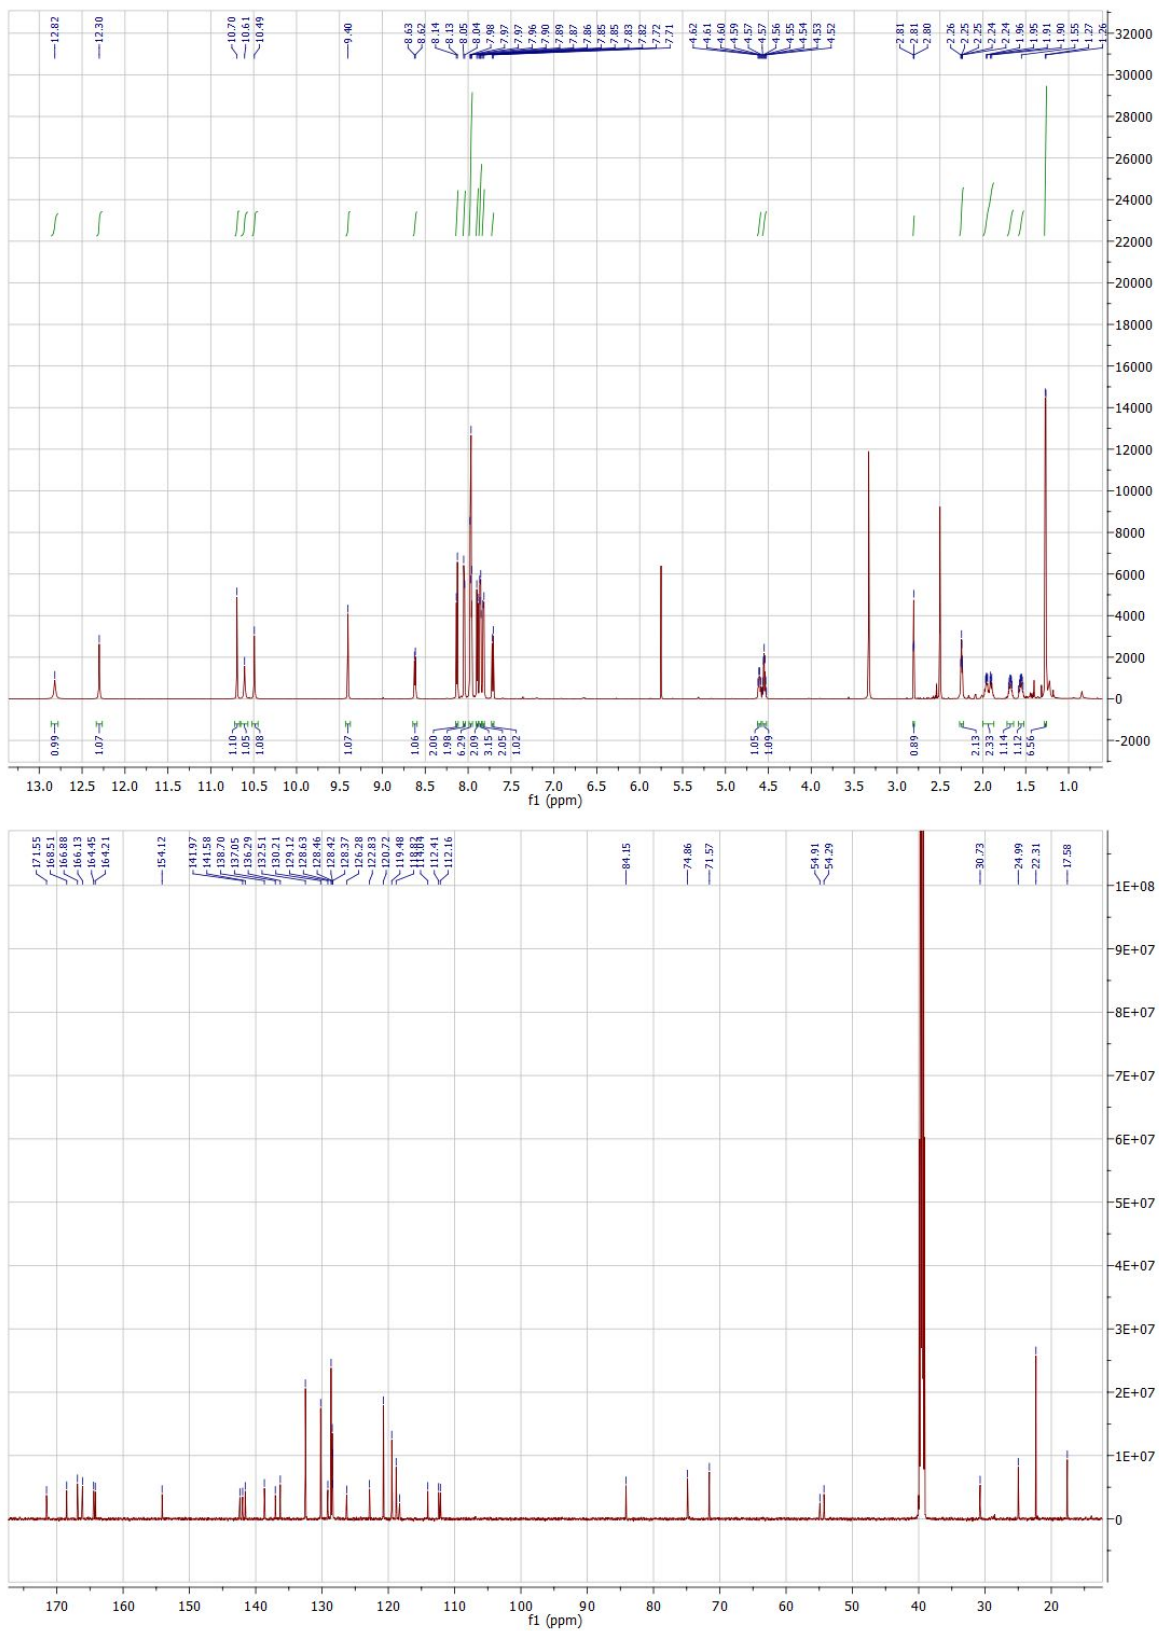

Figure S11. <sup>1</sup>H- (top) and <sup>13</sup>C-NMR (bottom) spectrum of compound 30.

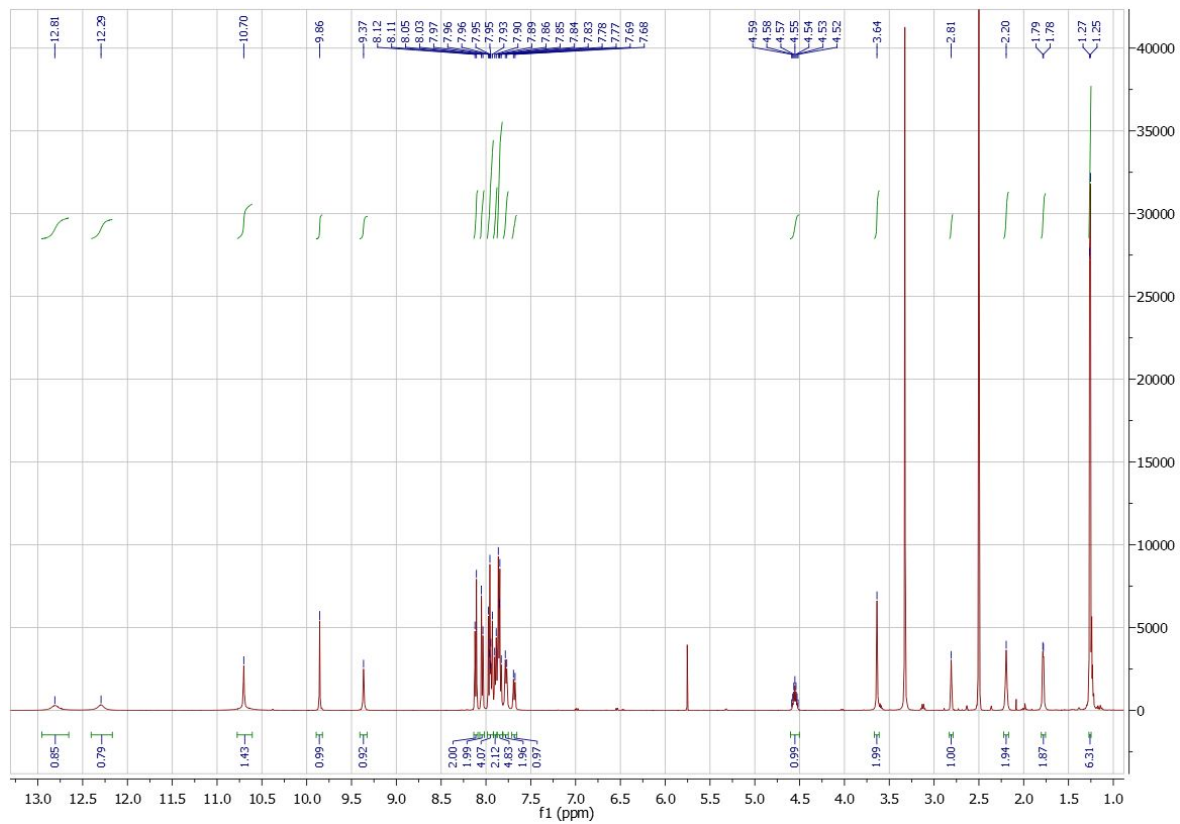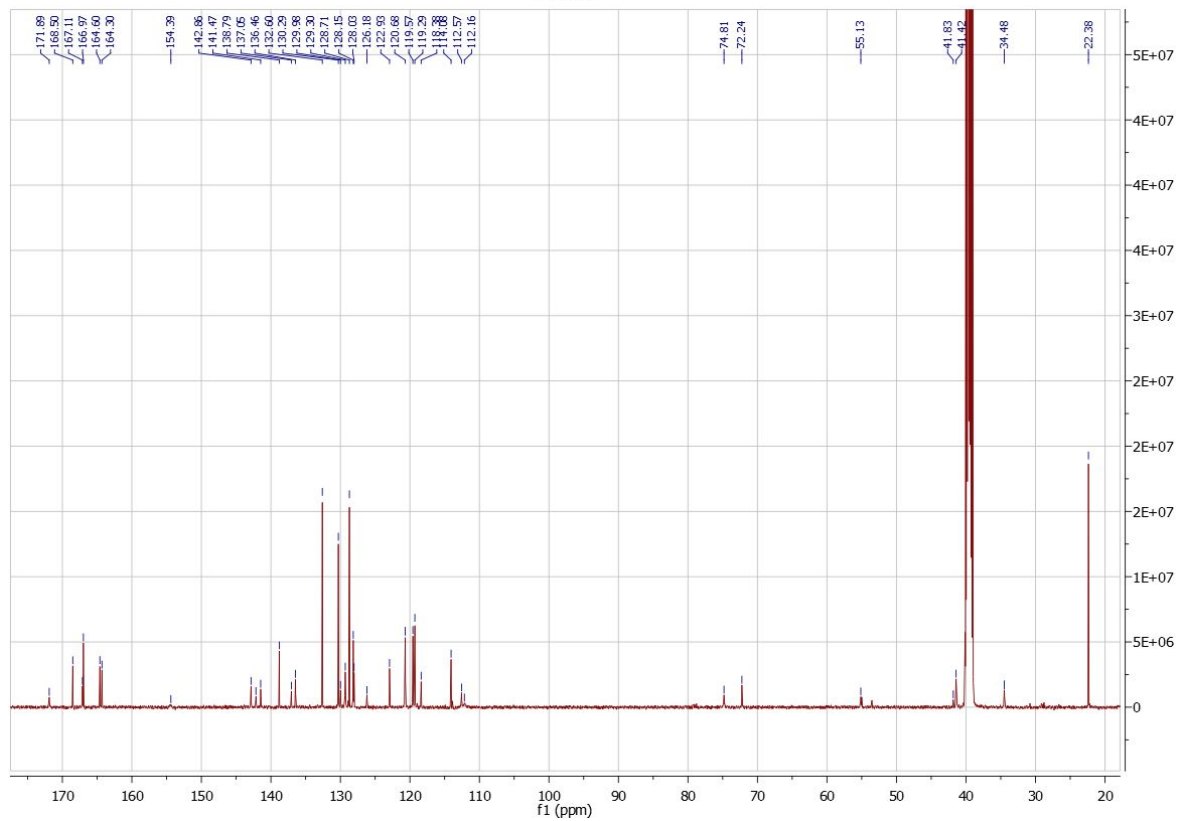

Figure S12. <sup>1</sup>H- (top) and <sup>13</sup>C-NMR (bottom) spectrum of compound **31**.

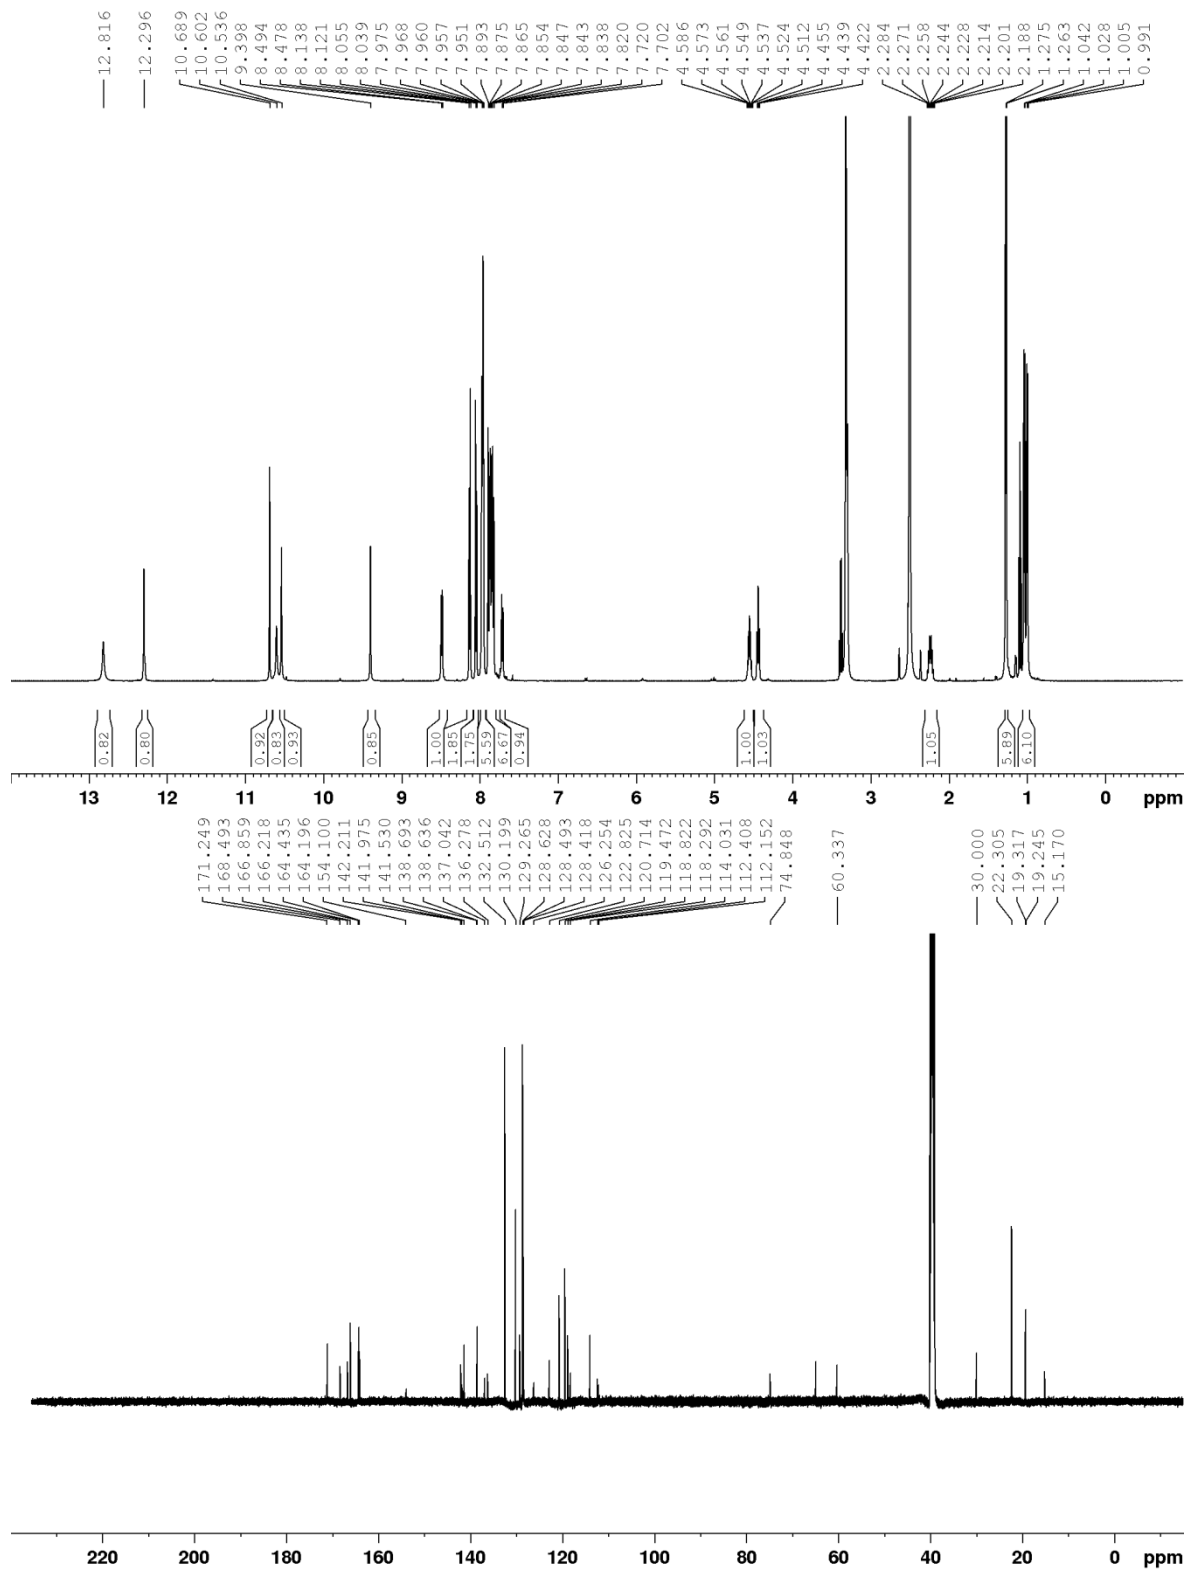

Figure S13. <sup>1</sup>H- (top) and <sup>13</sup>C-NMR (bottom) spectrum of compound **32**.

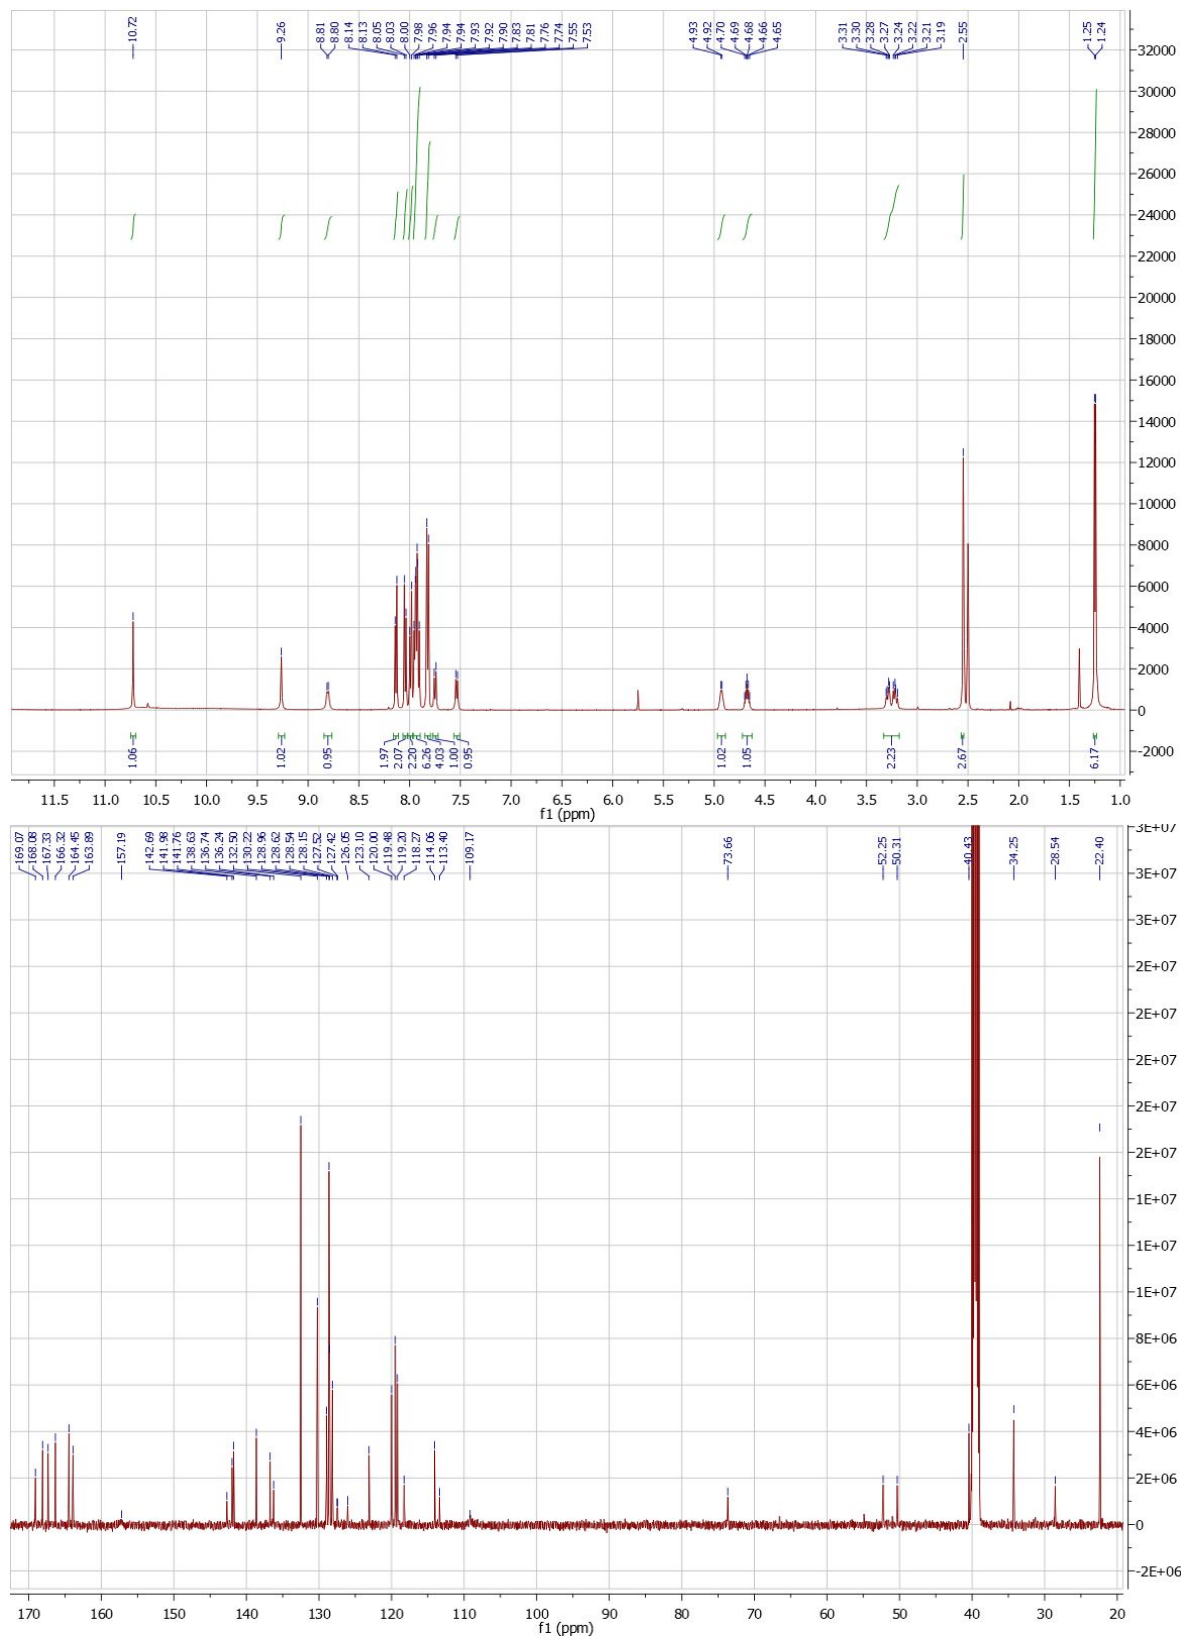

Figure S14.  $^1\text{H}$ - (top) and  $^{13}\text{C}$ -NMR (bottom) spectrum of compound 34.



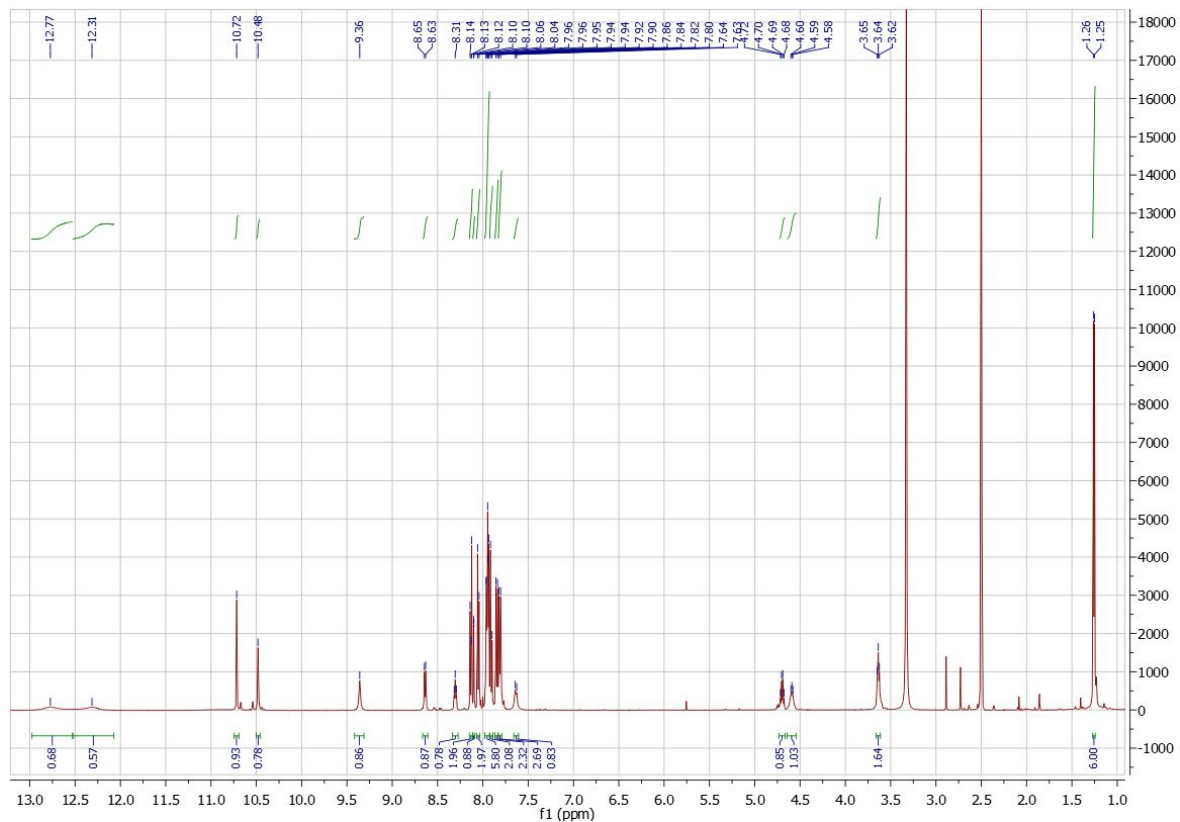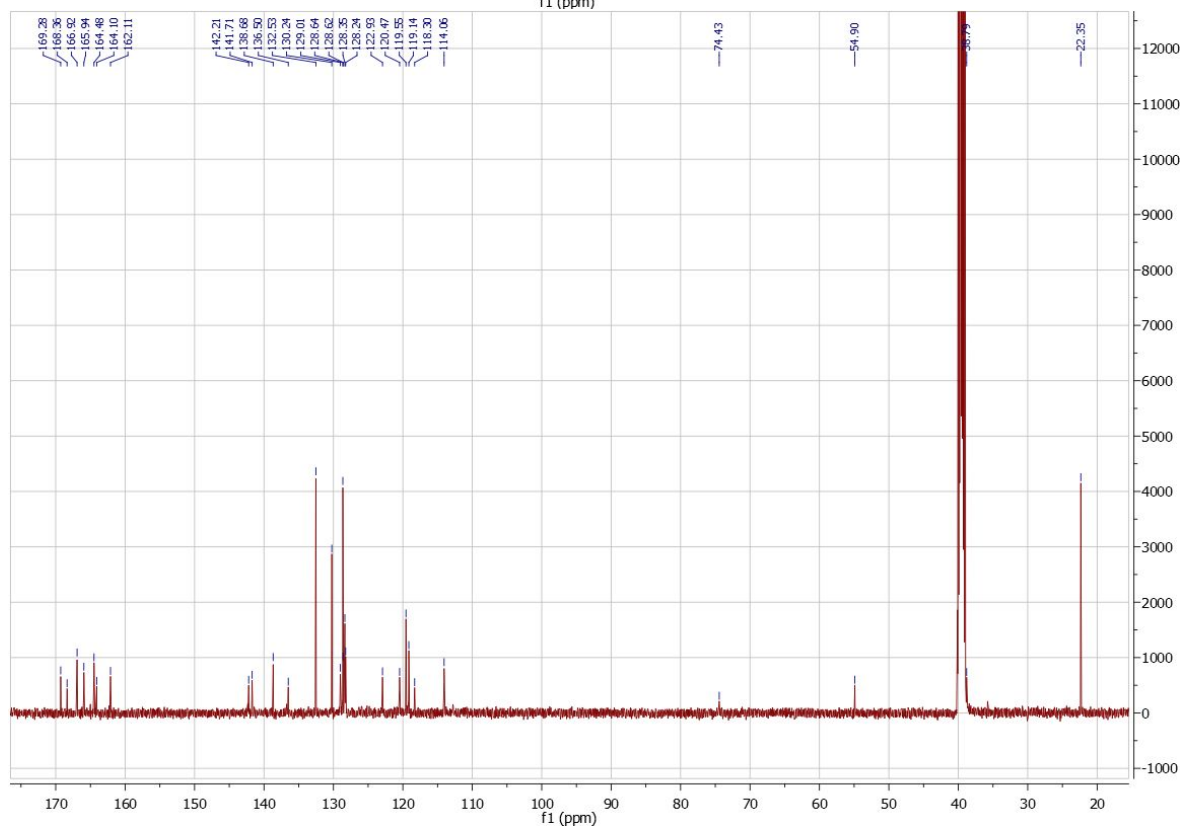

Figure S15. <sup>1</sup>H- (top) and <sup>13</sup>C-NMR (bottom) spectrum of compound **35**.

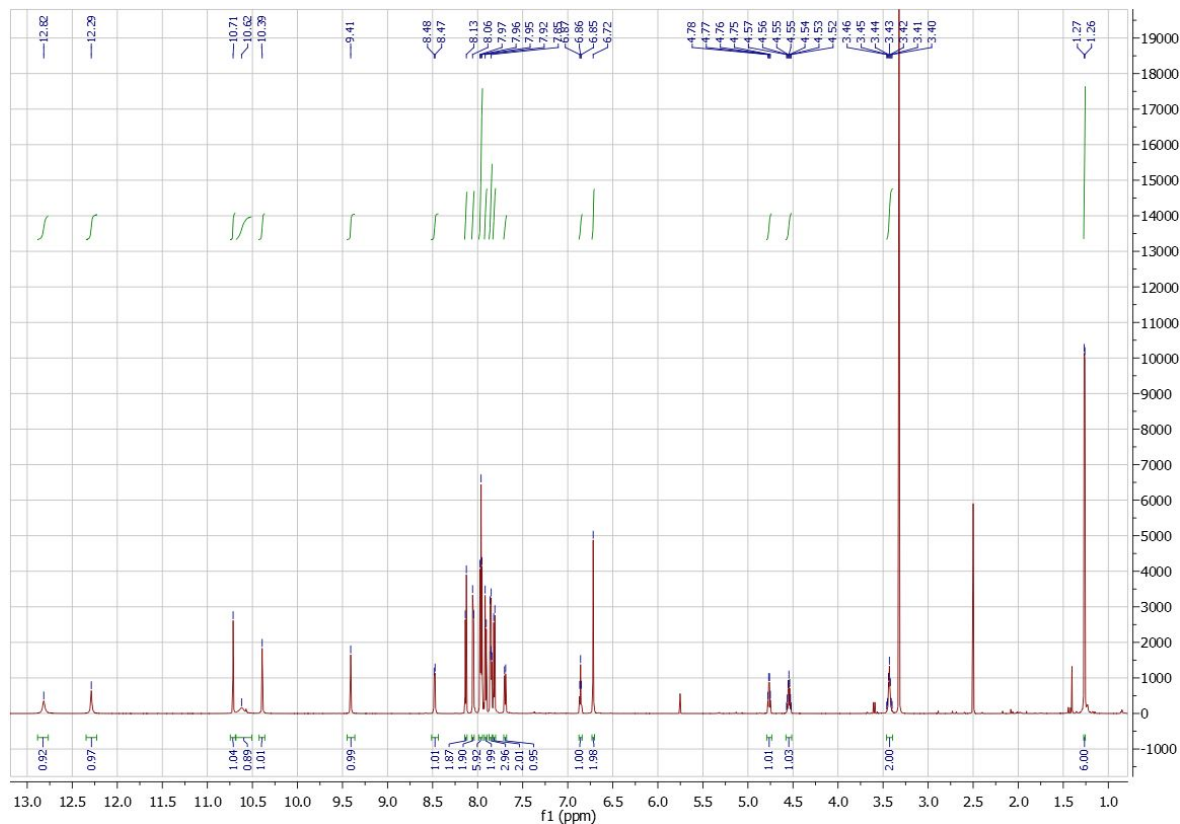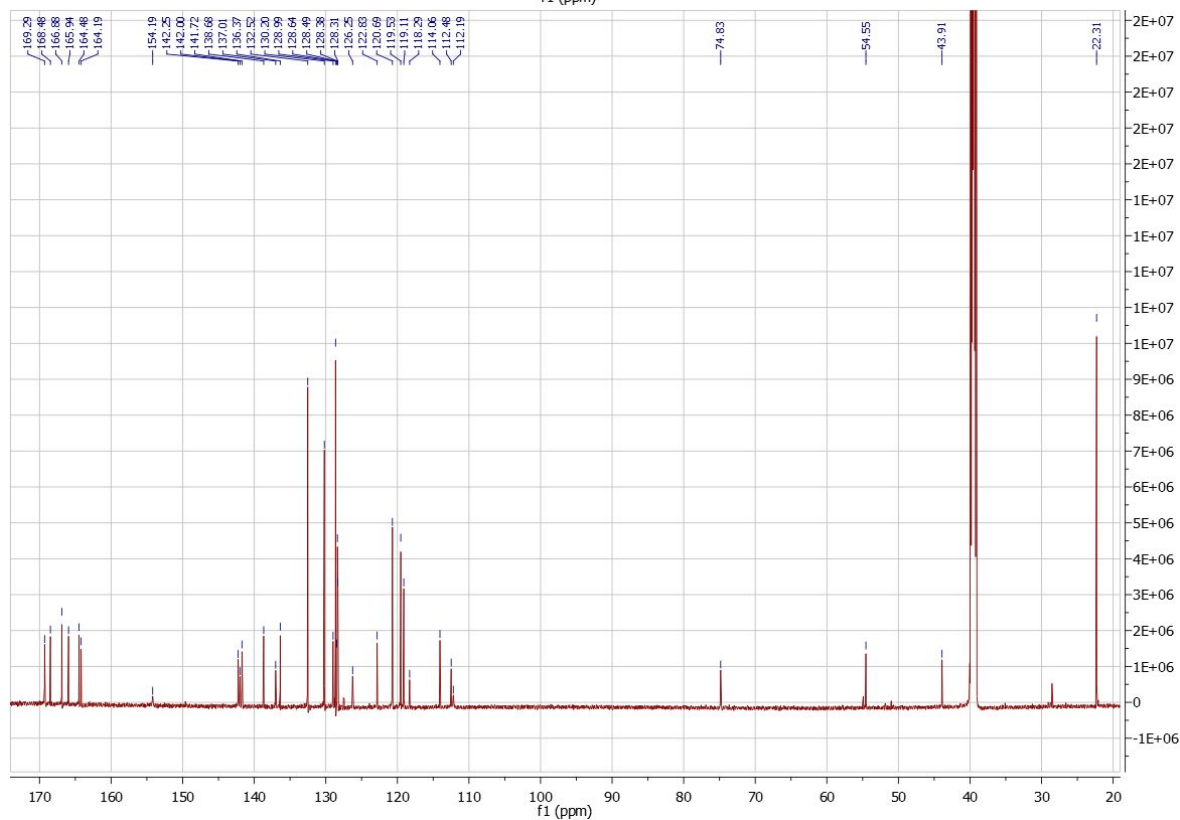

Figure S16. <sup>1</sup>H- (top) and <sup>13</sup>C-NMR (bottom) spectrum of compound **36**.

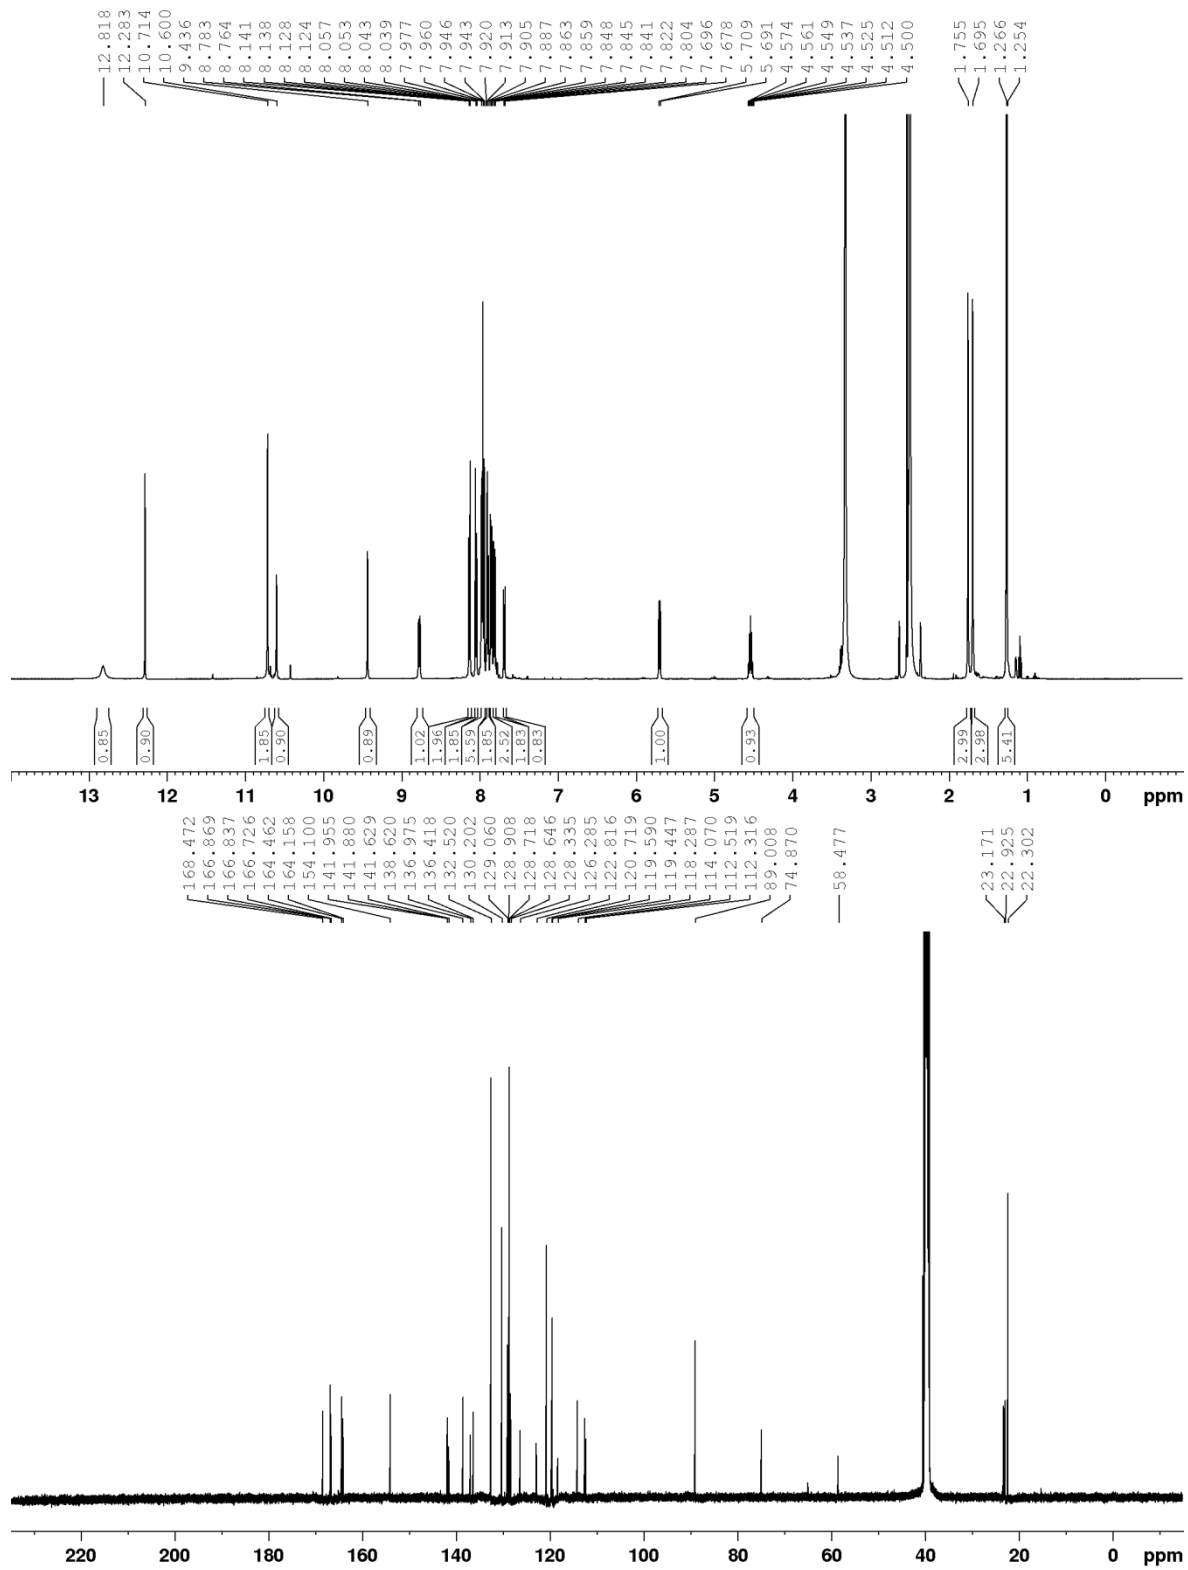

Figure S17. <sup>1</sup>H- (top) and <sup>13</sup>C-NMR (bottom) spectrum of compound 37.

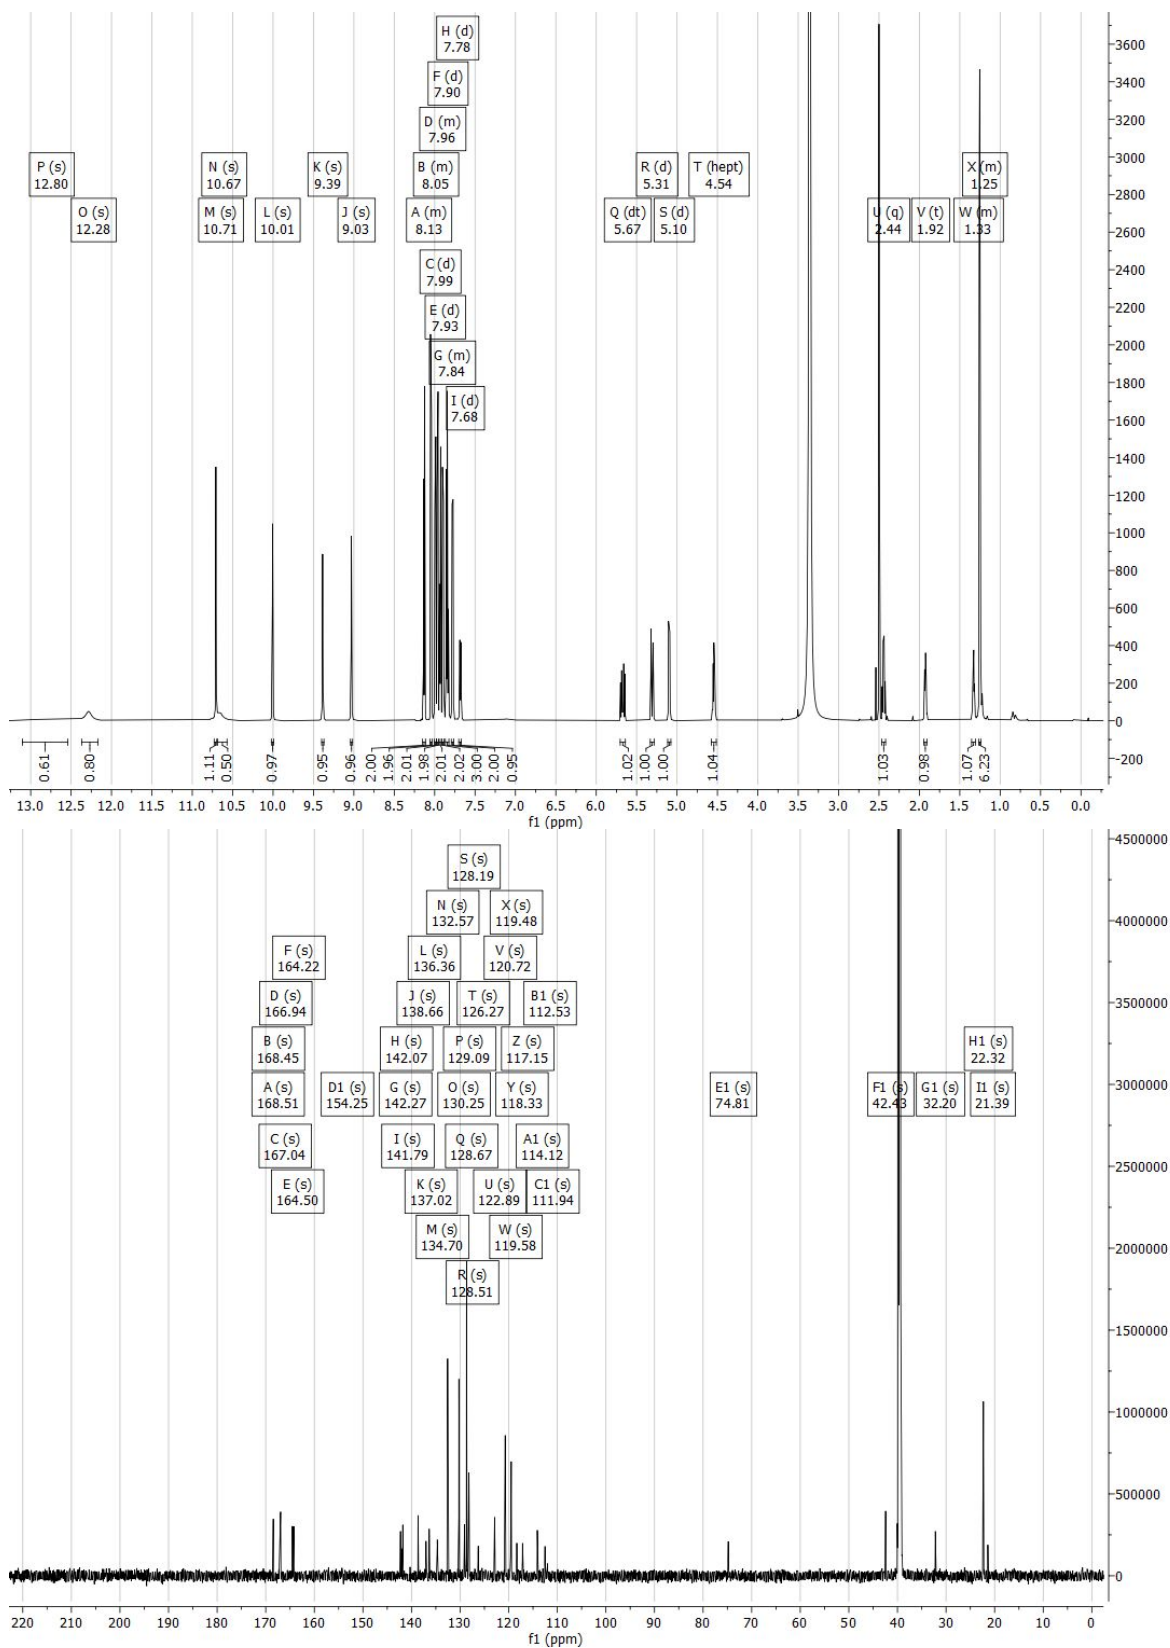

Figure S18. <sup>1</sup>H- (top) and <sup>13</sup>C-NMR (bottom) spectrum of compound **38**.

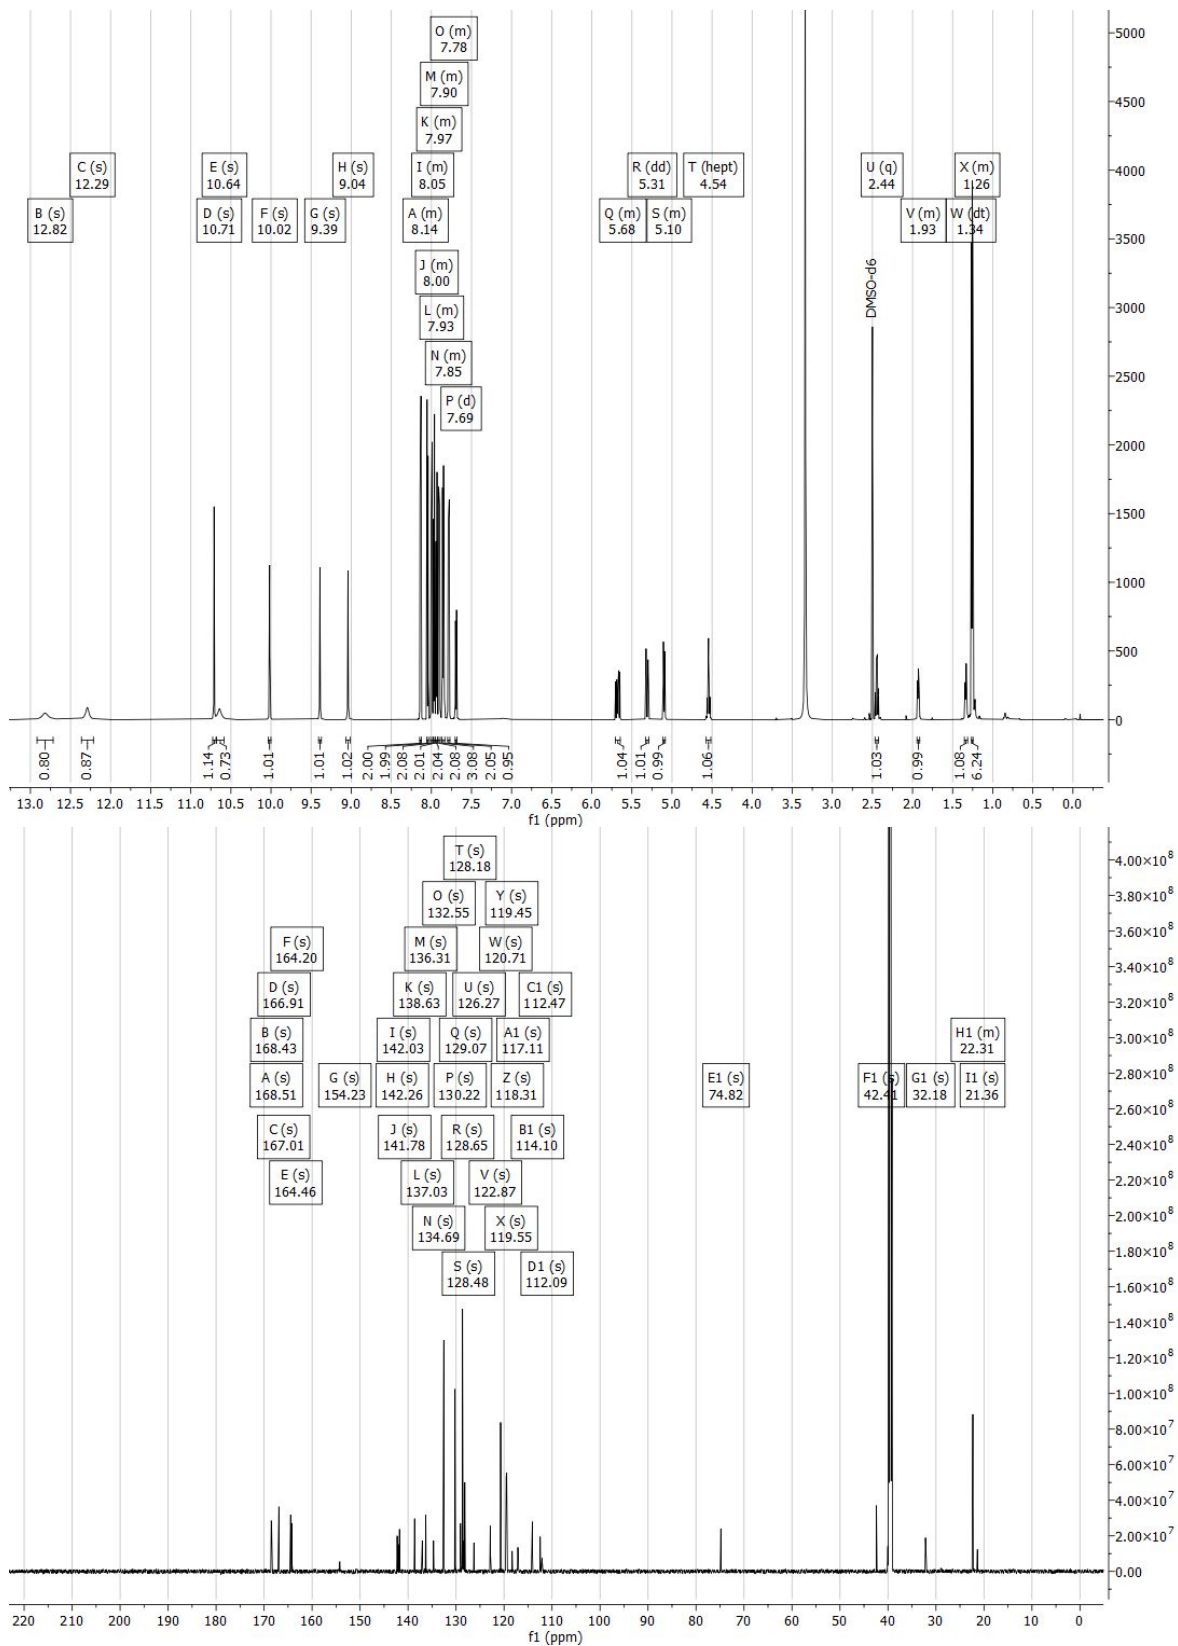

Figure S19. <sup>1</sup>H- (top) and <sup>13</sup>C-NMR (bottom) spectrum of compound **39**.

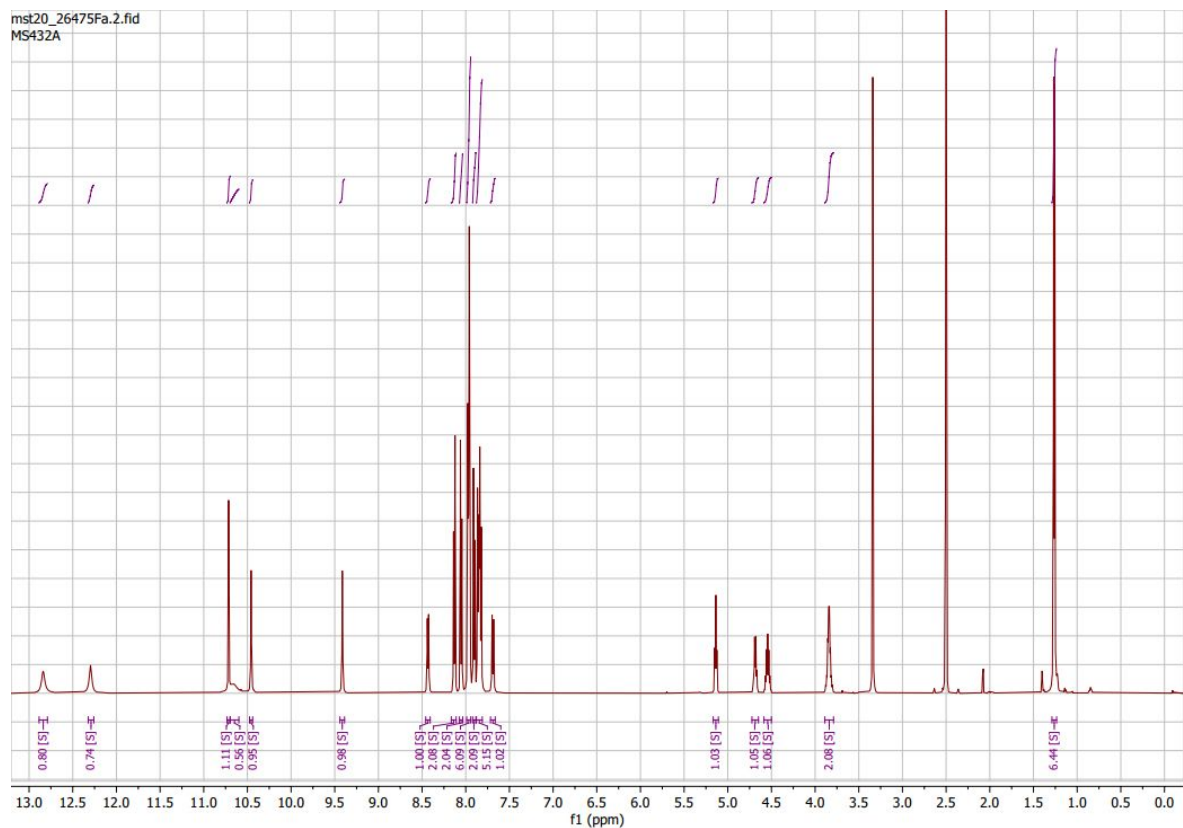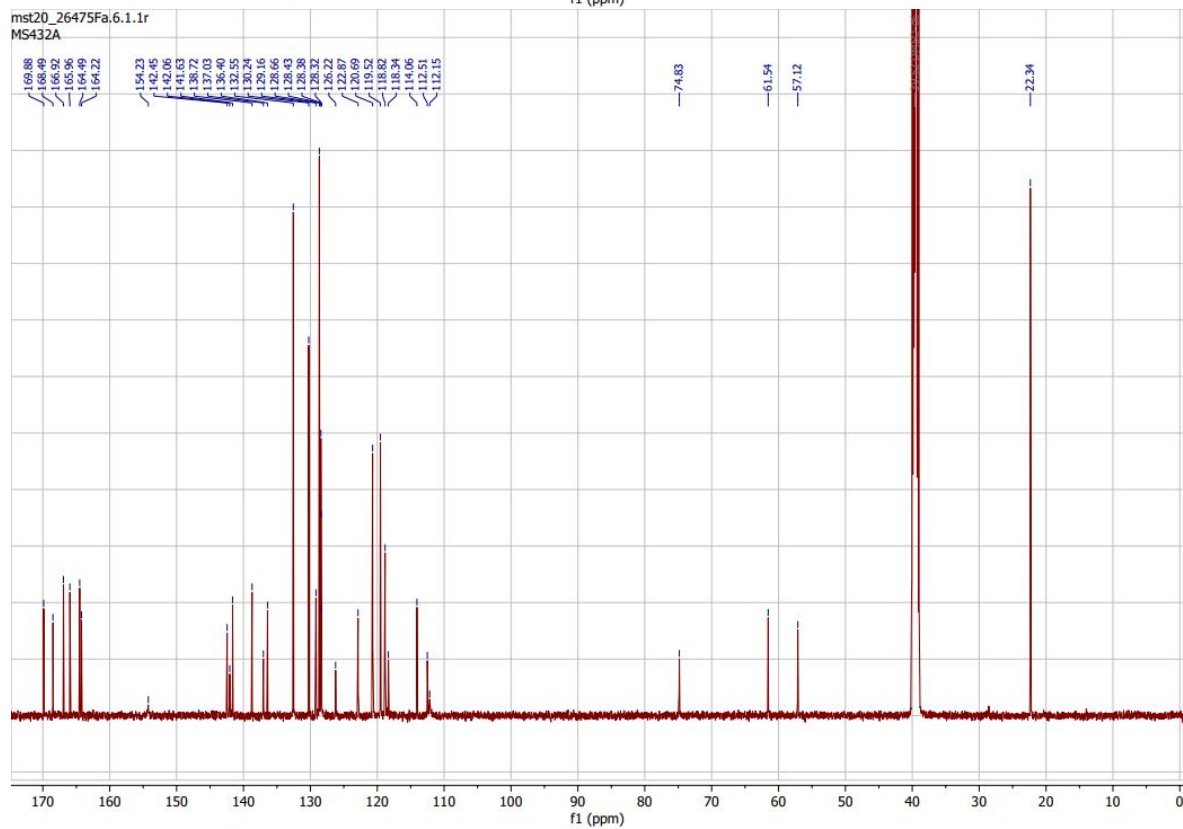

Figure S20.  $^1\text{H}$ - (top) and  $^{13}\text{C}$ -NMR (bottom) spectrum of compound **40**.

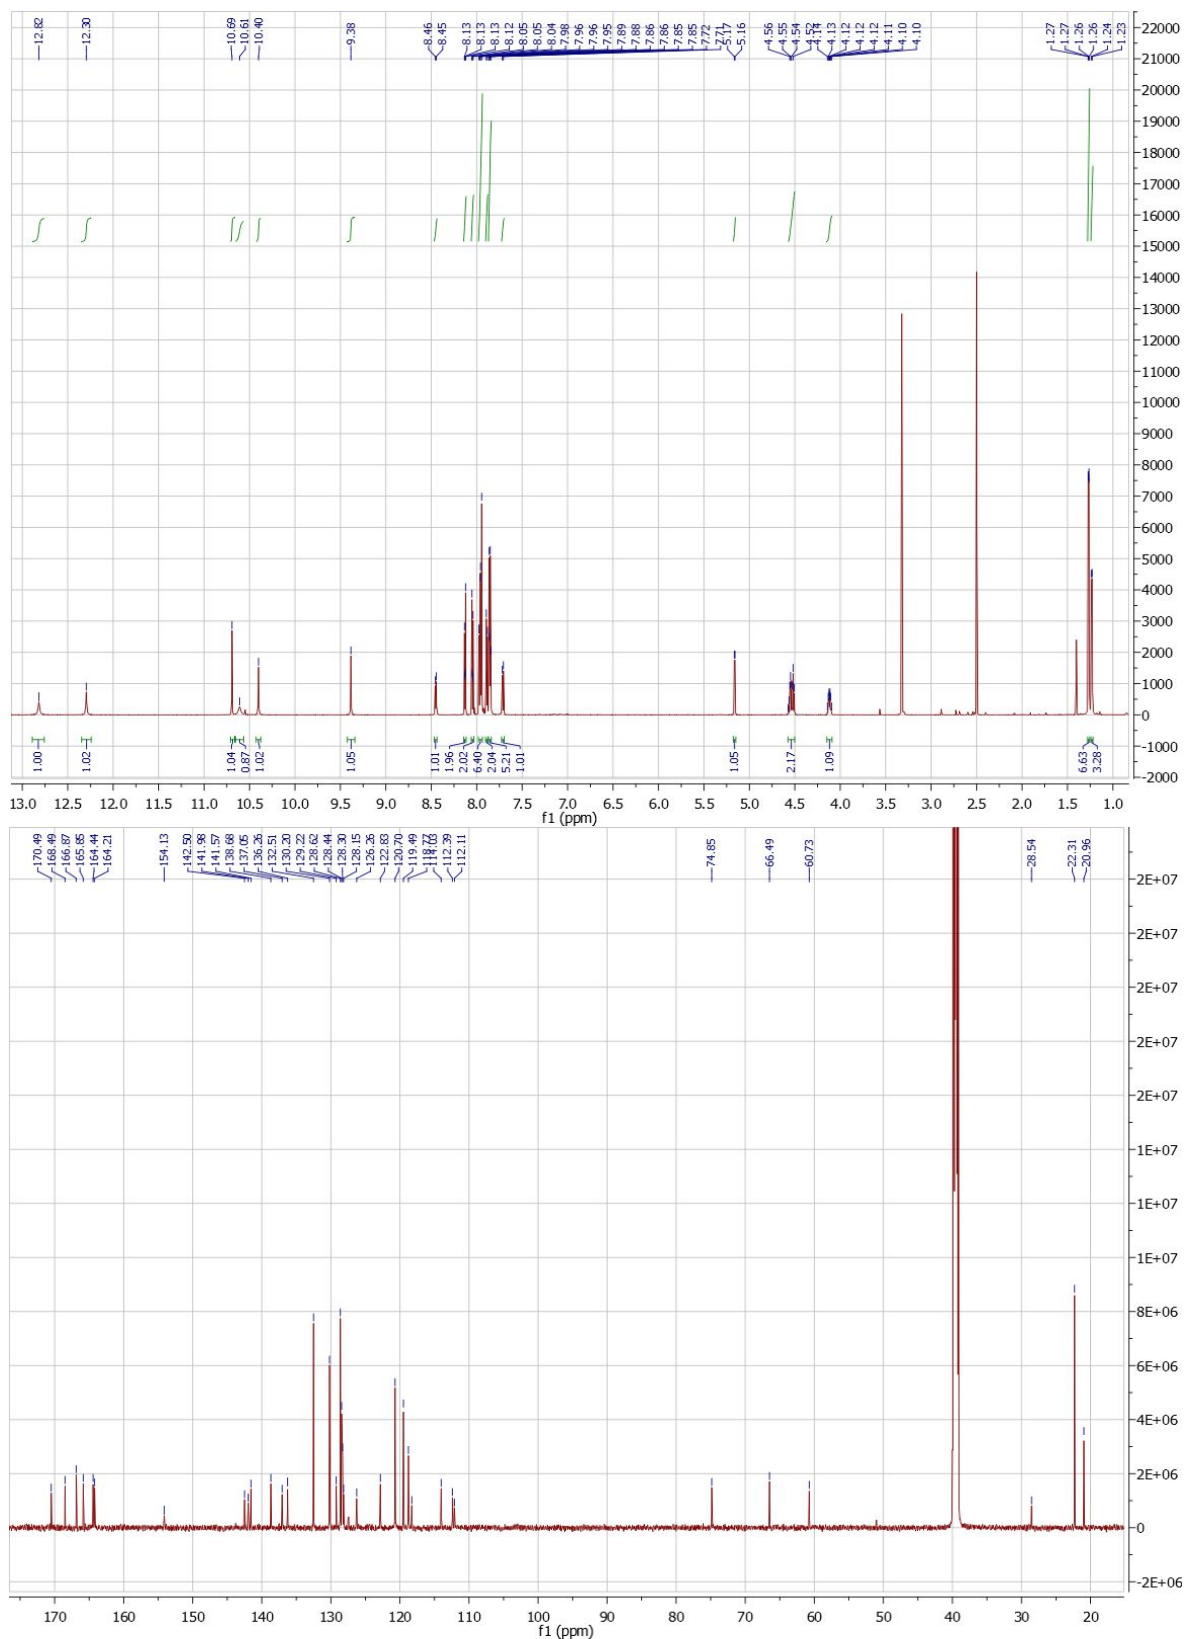

Figure S21.  $^1\text{H}$ - (top) and  $^{13}\text{C}$ -NMR (bottom) spectrum of compound **41**.

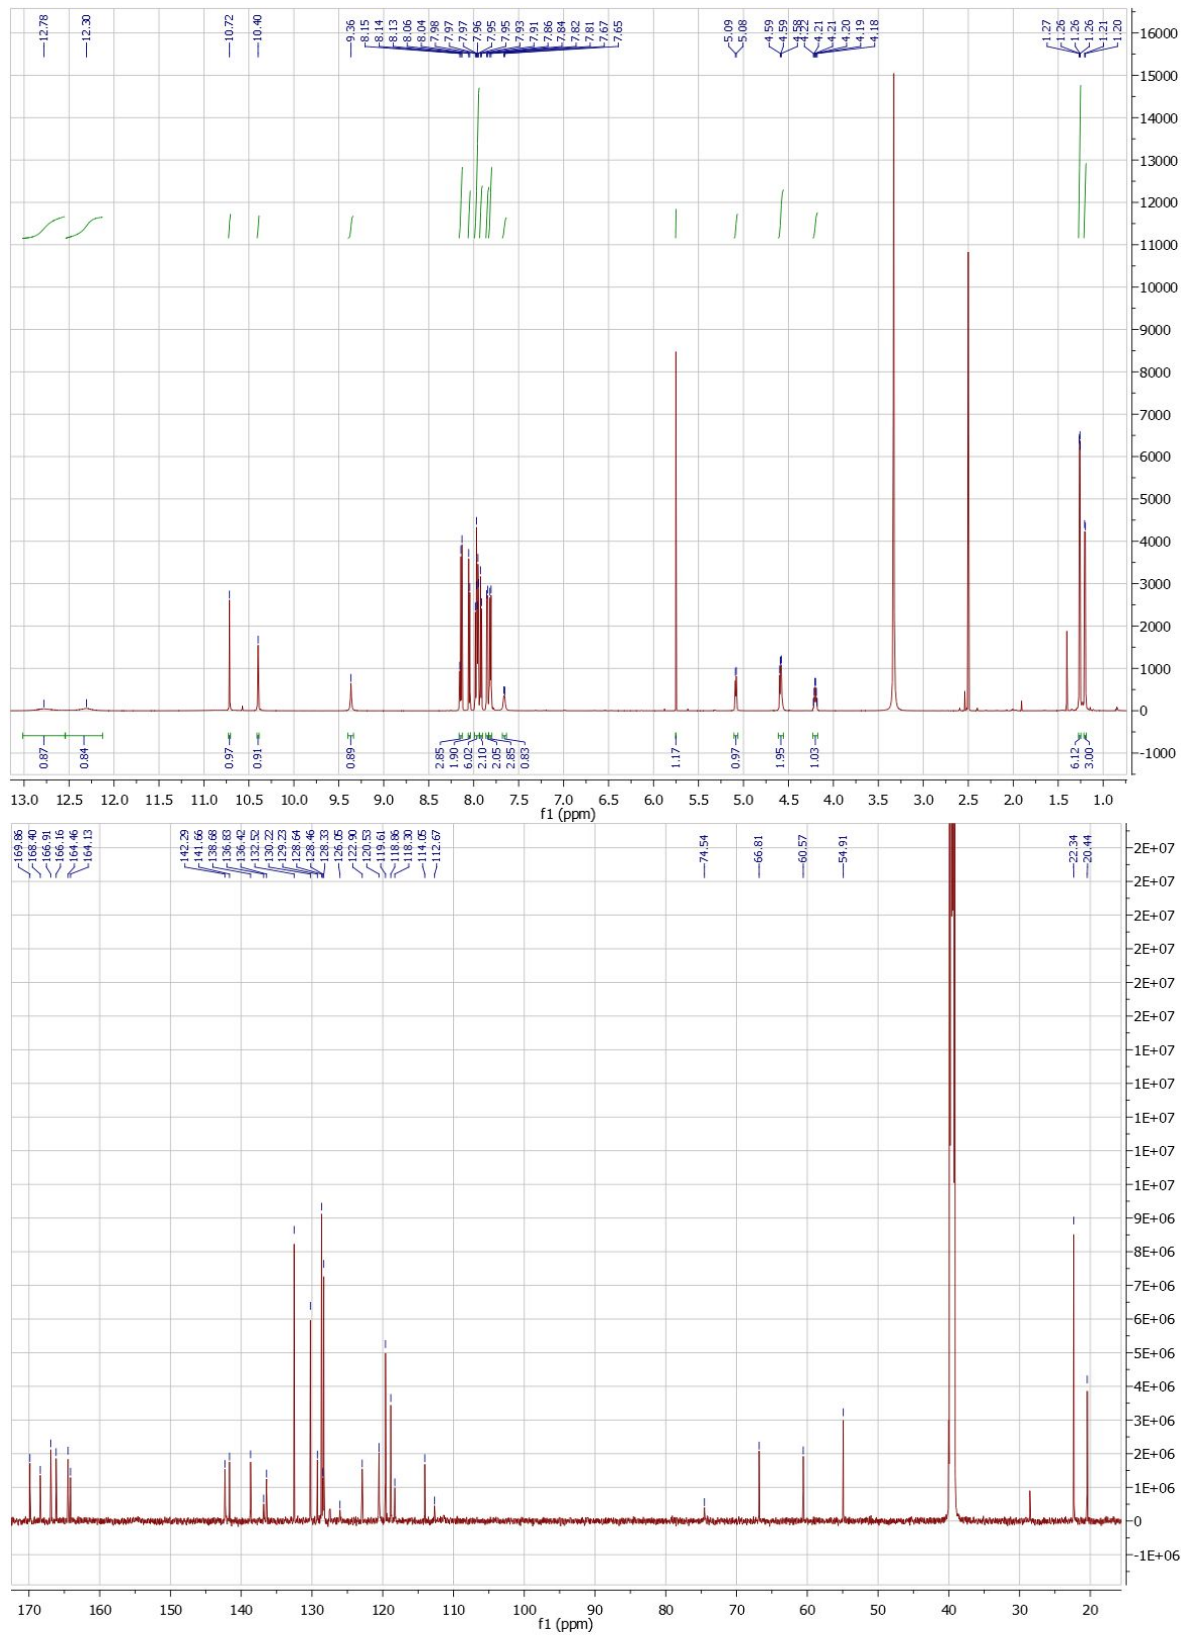

Figure S22.  $^1\text{H-}$  (top) and  $^{13}\text{C-}$ NMR (bottom) spectrum of compound **42**.



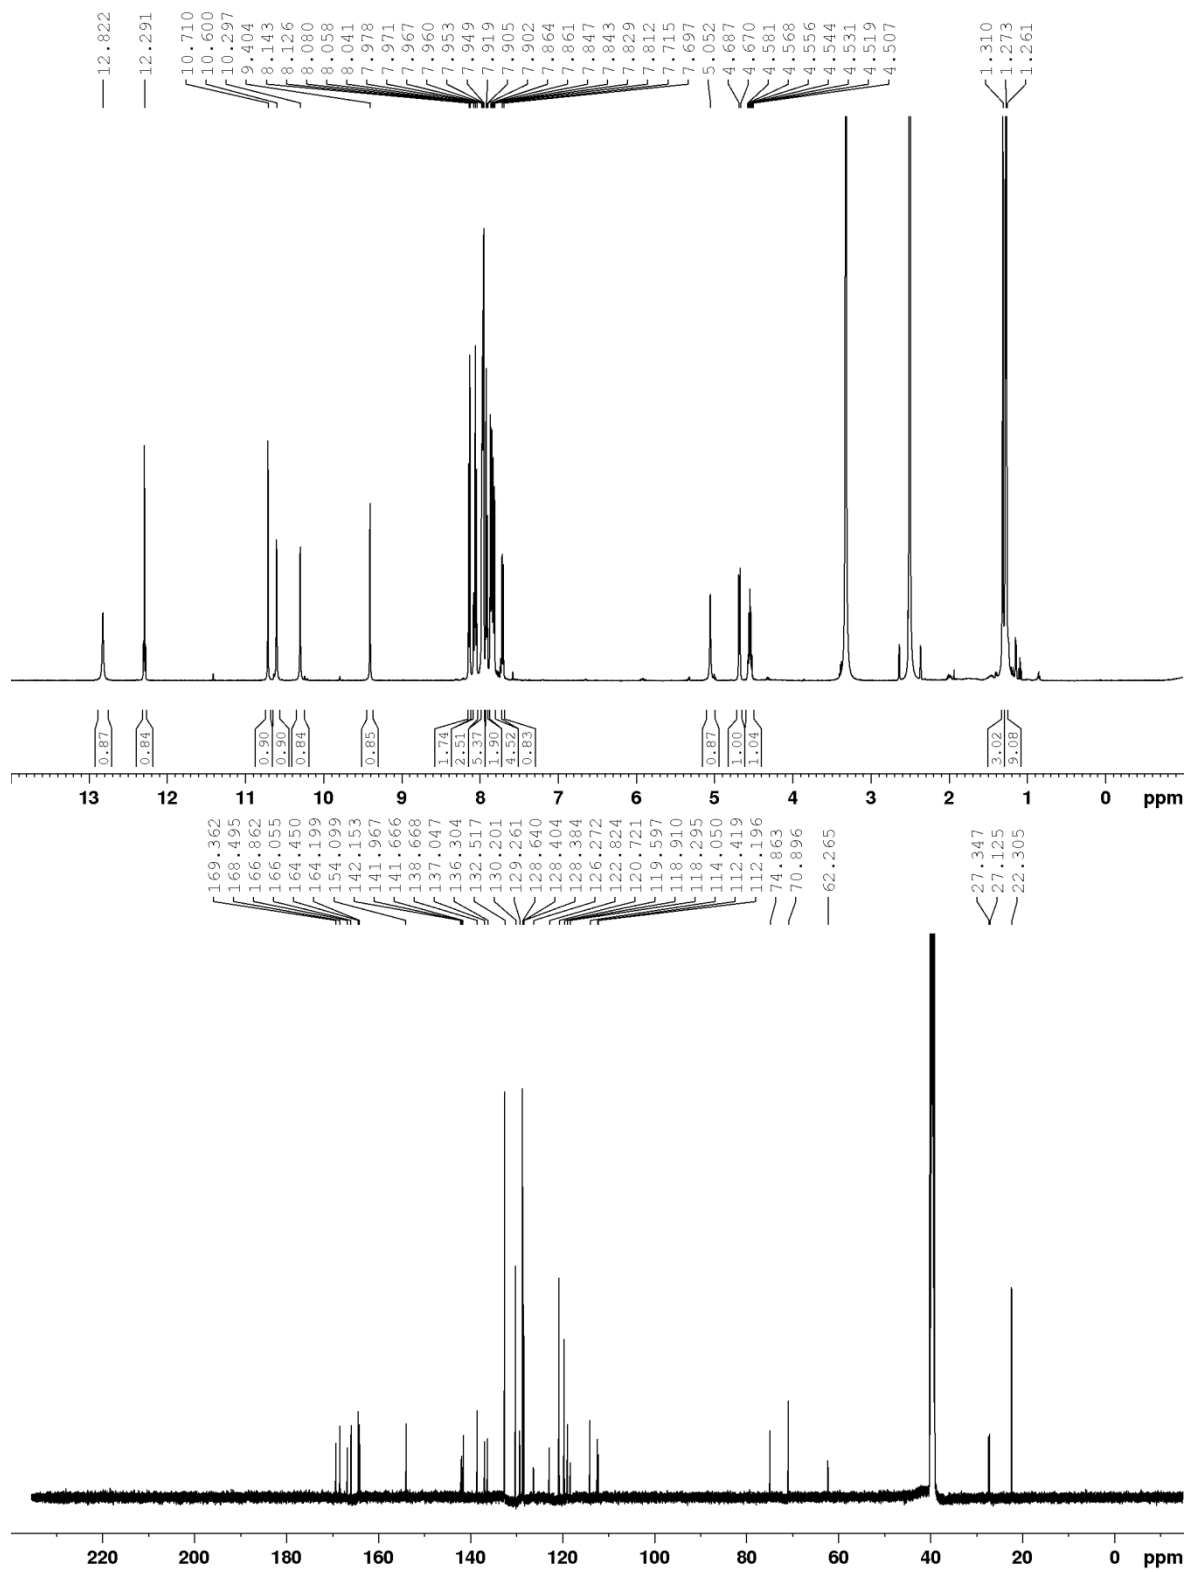

Figure S23. <sup>1</sup>H- (top) and <sup>13</sup>C-NMR (bottom) spectrum of compound **43**.

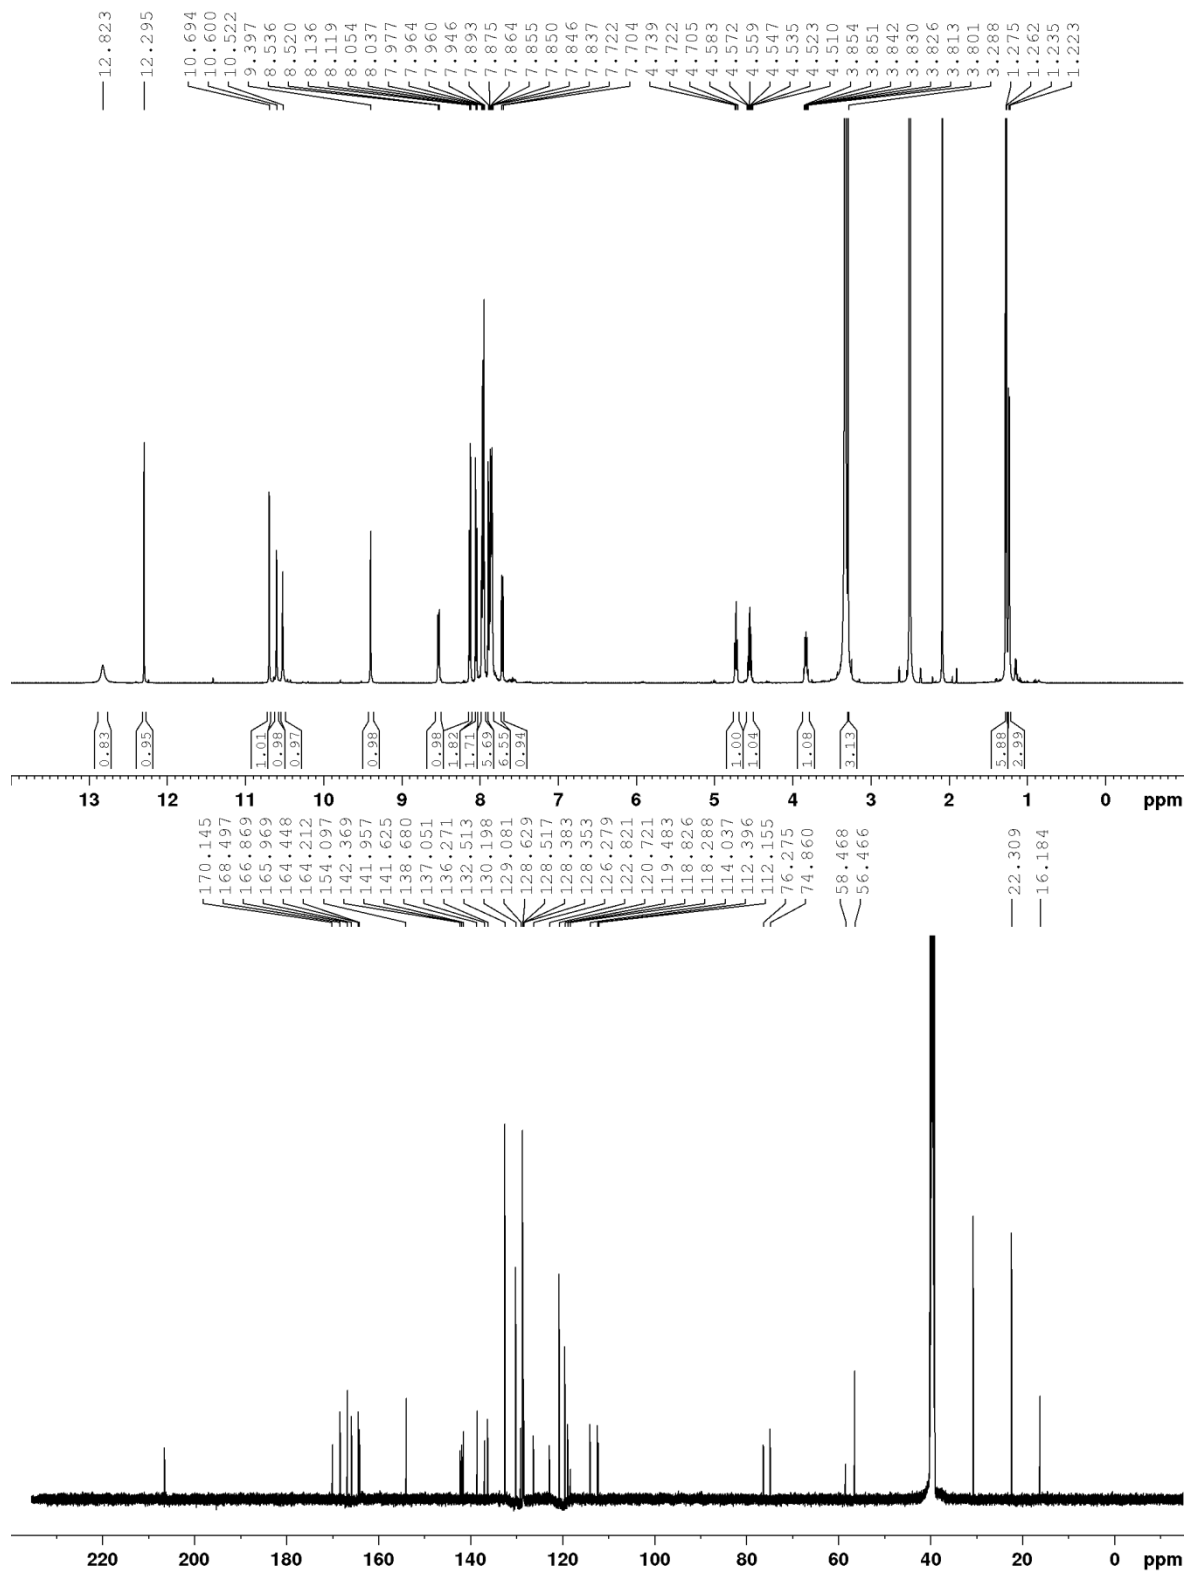

Figure S24. <sup>1</sup>H- (top) and <sup>13</sup>C-NMR (bottom) spectrum of compound **44**.

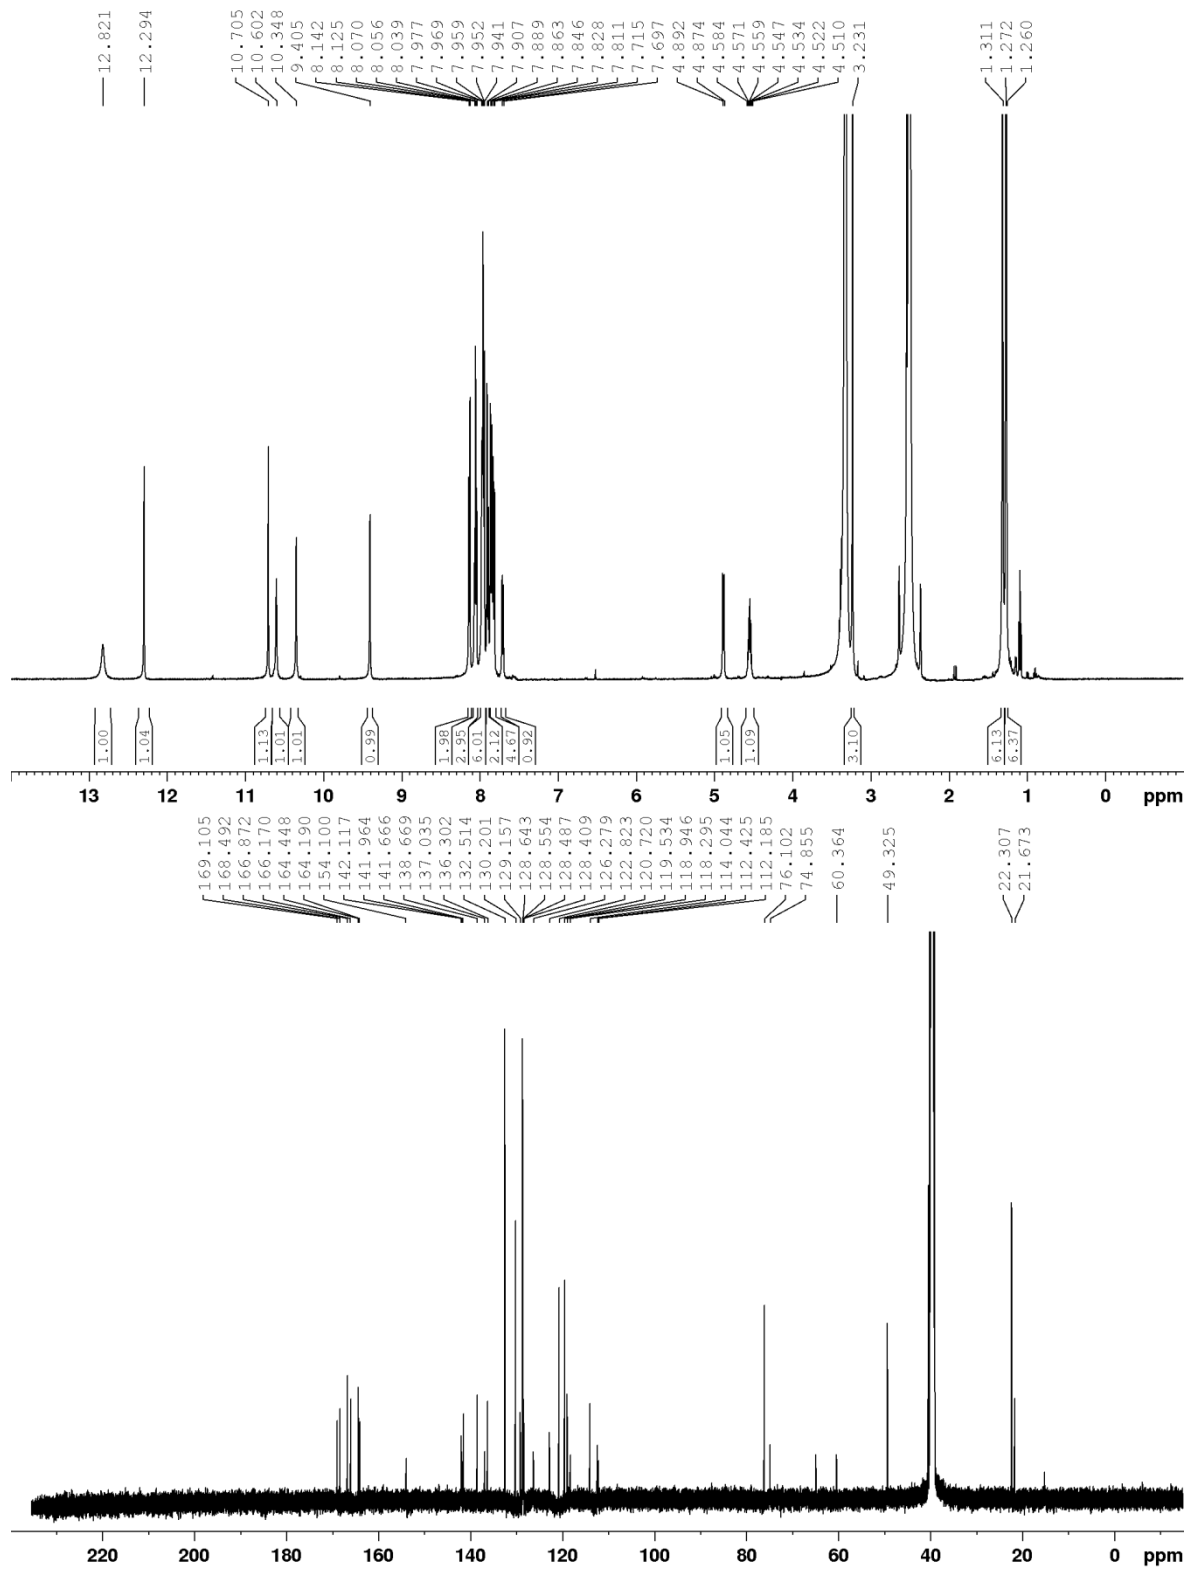

Figure S25. <sup>1</sup>H- (top) and <sup>13</sup>C-NMR (bottom) spectrum of compound 45.

## HPLC chromatograms

The HPLC chromatograms were determined as described in the manuscript with Phenomenex Aeris PEPTIDE XB-C18, 50 x 2.1 mm, 3.6  $\mu\text{m}$  at a flow rate of 700  $\mu\text{l min}^{-1}$ .

HPLC for compound **13**

Purity: 98.1 %

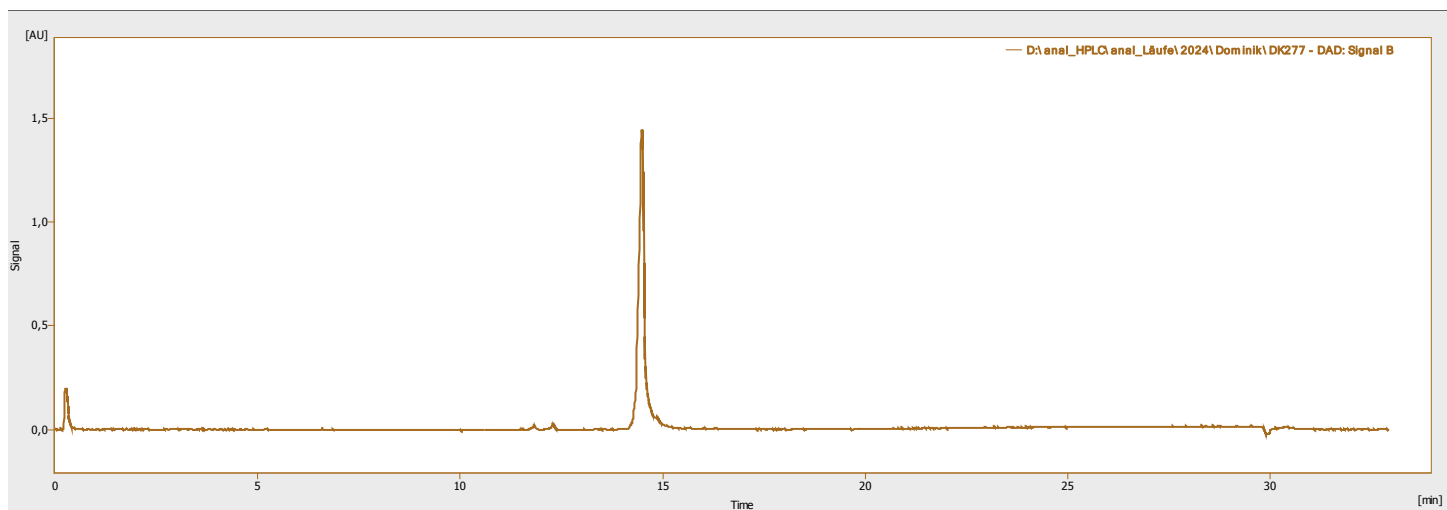

HPLC for compound **17**

Purity: 99.0 %

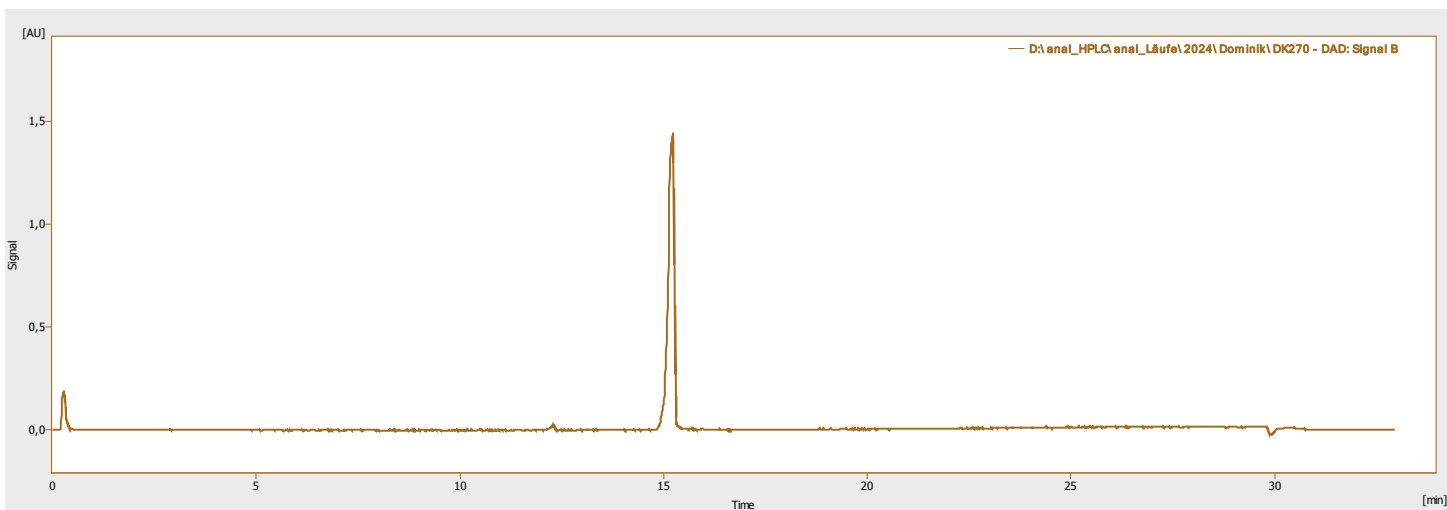

HPLC for compound **21**  
Purity: 99.0 %

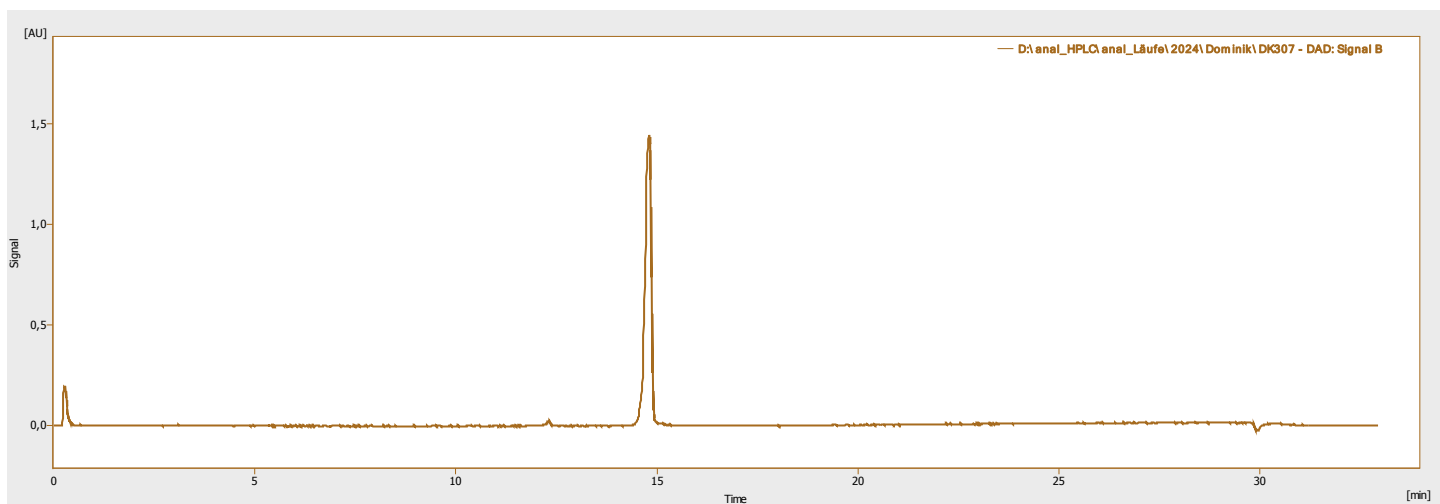

HPLC for compound **38**  
Purity: 99.0 %

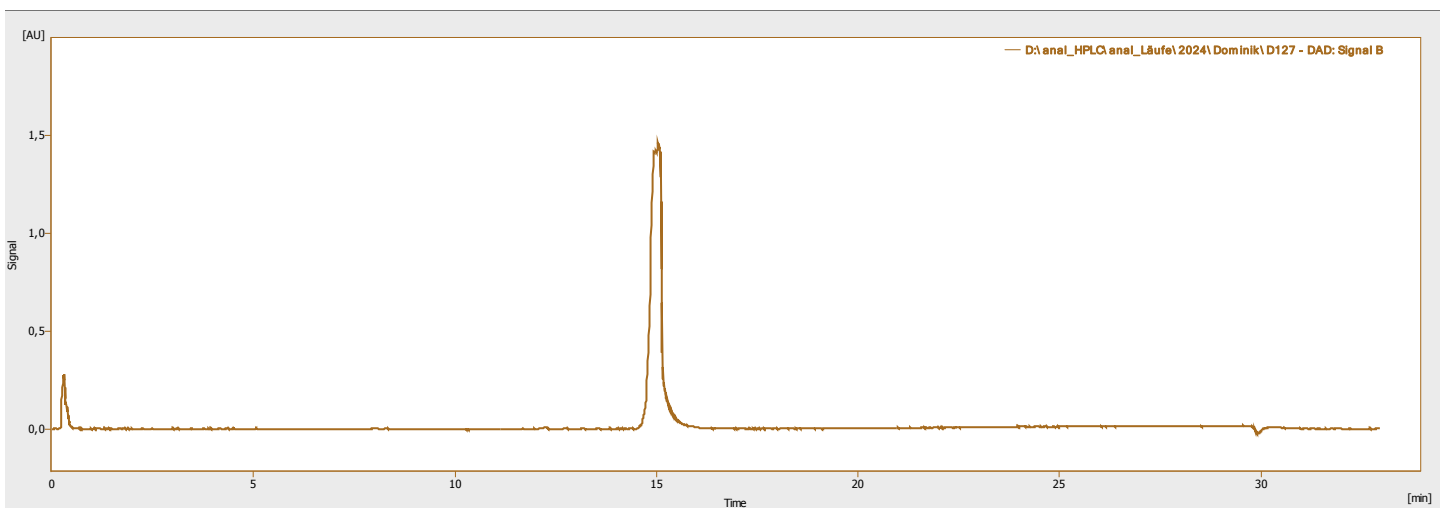

HPLC for compound **42**

Purity: 97.2 %

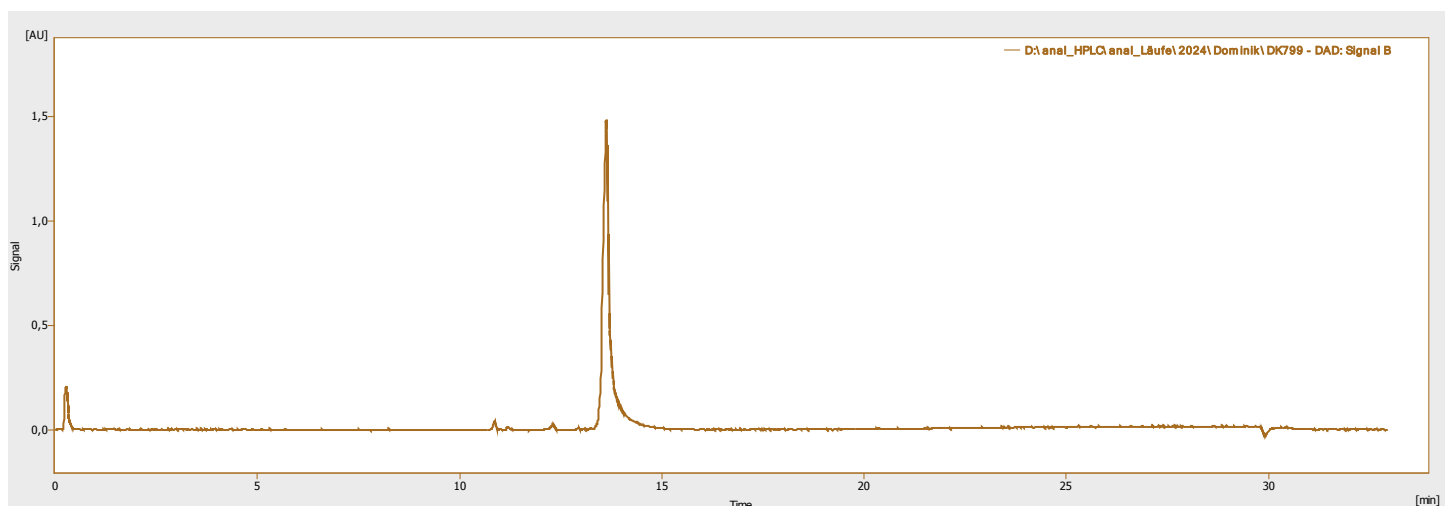

## References

- (1) Michalczyk, E.; Hommernick, K.; Behroz, I.; Kulike, M.; Pakosz-Stępień, Z.; Mazurek, L.; Seidel, M.; Kunert, M.; Santos, K.; von Moeller, H.; et al. Molecular mechanism of topoisomerase poisoning by the peptide antibiotic albicidin. *Nat. Catal.* **2023**, *6* (1), 52-67. DOI: 10.1038/s41929-022-00904-1.
- (2) Friesner, R. A.; Banks, J. L.; Murphy, R. B.; Halgren, T. A.; Klicic, J. J.; Mainz, D. T.; Repasky, M. P.; Knoll, E. H.; Shelley, M.; Perry, J. K.; et al. Glide: A New Approach for Rapid, Accurate Docking and Scoring. 1. Method and Assessment of Docking Accuracy. *J. Med. Chem.* **2004**, *47* (7), 1739-1749. DOI: 10.1021/jm0306430.
- (3) Krass, J. D.; Jastorff, B.; Genieser, H. G. Determination of lipophilicity by gradient elution high-performance liquid chromatography. *Anal Chem* **1997**, *69* (13), 2575-2581. DOI: 10.1021/ac961246i.
- (4) Baumann, S.; Herrmann, J.; Raju, R.; Steinmetz, H.; Mohr, K. I.; Hüttel, S.; Harmrolfs, K.; Stadler, M.; Müller, R. Cystobactamids: Myxobacterial Topoisomerase Inhibitors Exhibiting Potent Antibacterial Activity. *Angew. Chem. Int. Ed.* **2014**, *53* (52), 14605-14609, <https://doi.org/10.1002/anie.201409964>. DOI: <https://doi.org/10.1002/anie.201409964> (accessed 2023/07/14).
- (5) Wiegand, I.; Hilpert, K.; Hancock, R. E. W. Agar and broth dilution methods to determine the minimal inhibitory concentration (MIC) of antimicrobial substances. *Nat. Protoc.* **2008**, *3* (2), 163-175. DOI: 10.1038/nprot.2007.521.
